1 Running title: **Synergic and antagonist effects of P and Na<sup>+</sup> on *Arundo donax***

2

3 **Impact of high phosphorous and sodium on productivity and stress tolerance of**

4 ***Arundo donax* plants**

5

6 Coccozza Claudia<sup>1,\*</sup>, Brilli Federico<sup>1,\*</sup>, Miozzi Laura<sup>2</sup>, Pignattelli Sara<sup>1</sup>, Rotunno Silvia<sup>3</sup>,

7 Brunetti Cecilia<sup>4</sup>, Giordano Cristiana<sup>4</sup>, Pollastri Susanna<sup>1</sup>, Centritto Mauro<sup>4</sup>, Accotto Gian

8 Paolo<sup>2</sup>, Tognetti Roberto<sup>6,7</sup>, Loreto Francesco<sup>8</sup>

9

10 <sup>1</sup> National Research Council of Italy, Institute for the Sustainable Plant Protection (CNR -  
11 IPSP), Via Madonna del Piano 10, 50019 Sesto Fiorentino, Italy

12 <sup>2</sup> National Research Council of Italy, Institute for the Sustainable Plant Protection (CNR -  
13 IPSP), Strada delle Cacce 73, 10135 Torino, Italy

14 <sup>3</sup> Department of Biosciences and Territory, University of Molise, contrada Fonte Lappone,  
15 86090 Pesche, Italy

16 <sup>4</sup> National Research Council of Italy, Trees and Timber Institute (CNR - IVALSA), Via  
17 Madonna del Piano 10, 50019 Sesto Fiorentino, Italy,

18 <sup>5</sup> National Research Council of Italy, Institute for Biosciences and Bioresources (CNR -  
19 IBBR), Via Madonna del Piano 10, 50019 Sesto Fiorentino, Italy

20 <sup>6</sup> Department of Agriculture, Environment and Food Sciences, University of Molise, Via  
21 Francesco De Sanctis, 86100 Campobasso, Italy

22 <sup>7</sup> The EFI Project Centre on Mountain Forests (MOUNTFOR), Edmund Mach Foundation,  
23 38010 San Michele all'Adige, Italy

24 <sup>8</sup> National Research Council of Italy, Department of Biology, Agriculture, and Food  
25 Sciences, Piazzale Aldo Moro 7, Roma, Italy

26 \* authors contributed equally to this work

27 Corresponding author: claudia.cocozza@ipsp.cnr.it; +393332528829

28

29 **Highlights**

30 *Arundo donax* is sensitive to elevated salinity. High phosphorous supply to salt-stressed *A.*  
31 *donax* enhances transcriptomic changes that induce the onset of physiological  
32 mechanisms of stress tolerance but limits productivity.

33

34 **Keywords:** abiotic stress, giant reed, isoprene emission, phosphorous, salinity,  
35 transcriptome

36

37 **Abstract**

38 *Arundo donax* L. is an invasive species recently employed for biomass production that  
39 emits large amounts of isoprene, a volatile compound having important defensive role.  
40 Here, the potential of *A. donax* to grow in degraded soils, characterized by poor fertility,  
41 eutrophication and/or salinization, has been evaluated at morphological, biochemical and  
42 transcriptional level. Our results highlight sensitivity of *A. donax* to P deficiency. Moreover,  
43 we show that *A. donax* response to salt stress (high sodium, Na<sup>+</sup>), which impaired plant  
44 performance causing detrimental effects on leaf cells ultrastructure, is characterized by  
45 enhanced biosynthesis of antioxidant carotenoids and sucrose. Differently from Na<sup>+</sup>, high  
46 phosphorous (P) supply did not hamper photosynthesis although it affected carbon  
47 metabolism through reduction of starch content and by lowering isoprene emission. In  
48 particular, we revealed on salt-stress leaves that high P enhanced the expression of genes  
49 involved in abiotic stress tolerance, but further increased diffusive limitations to  
50 photosynthesis and slowed-down sugar turnover without modifying isoprene emission.  
51 Therefore, despite limiting productivity, high P improved *A. donax* tolerance to salinity by  
52 favouring the accumulation of carbohydrates that protect cells and increase osmotic  
53 potential, and by stimulating the synthesis of antioxidants that improves photo-protection  
54 and avoids excessive accumulation of reactive oxygen species.

## 55 **Introduction**

56 Phosphorus (P) is an essential element for many key enzymes and intermediates of plants  
57 photosynthetic CO<sub>2</sub> assimilation and sugar biosynthesis (Beck and Ziegler, 1989).

58 Phosphorous regulates energy storage reactions and maintains structural integrity of  
59 cellular membranes (Marschner, 1995). Phosphorous concentration is tightly regulated  
60 within the cells because changes in its availability can seriously impair plant physiological  
61 processes and structure (Shen *et al.*, 2011). On one hand, P deficiency affects the overall  
62 plant metabolism (Hernández *et al.*, 2007) reducing growth (Chiera *et al.*, 2002) and  
63 hampering the ability to reproduce and adapt to different environments (Wassen *et al.*,  
64 2005). On the other hand, P surplus decreases plant performances by inhibiting the  
65 biosynthesis of starch (Fredeen *et al.*, 1989) and other secondary metabolites (e.g.  
66 isoprenoids, Fernández-Martínez *et al.*, 2017, Fares *et al.*, 2008), and lowers nitrate  
67 assimilation in the roots (Rufy *et al.*, 1990).

68 Intensive exploitation of phosphate rock reserves for fertilization purposes may lead to  
69 their depletion by the end of this century (Cordell *et al.*, 2009). However, marginal lands,  
70 where high amounts of P are associated with salinity, are not suitable for agriculture. It is  
71 well-know that salinity impairs plant performance and productivity (Munns and Tester,  
72 2008). In particular, exposure to high sodium (Na<sup>+</sup>) concentration in soil increases diffusive  
73 (Centritto *et al.*, 2003) and biochemical limitations to photosynthetic CO<sub>2</sub> assimilation  
74 (Chaves *et al.*, 2009), decreases water transpiration rates, modifies the biosynthesis of  
75 both soluble sugars (Dubey and Singh, 1999) and starch (Parida *et al.*, 2002), and reduces  
76 pigments content in leaves (Kalaji *et al.*, 2011). Moreover, excess of Na<sup>+</sup> impairs root  
77 nutrient uptake by altering the trans-membrane transport of ions that leads to loss of turgor  
78 of plant cells and to further membrane damage following the formation of reactive oxygen  
79 species (ROS) (Sobhanian *et al.*, 2011).

80 *Arundo donax* L., the giant reed, is a non-food perennial rhizomatous invasive grass  
81 species belonging to *Poaceae* family (Pilu *et al.*, 2012). *A. donax* is one of the most  
82 efficient C3 plant species, able to colonize a wide spectrum of habitats worldwide, from  
83 very wet loam to relatively dry sandy soils (Webster *et al.*, 2016). *A. donax* displays a high  
84 photosynthetic rate and a fast-growing habit that make its cultivation suitable for biomass  
85 and bioenergy production (Webster *et al.*, 2016; Sánchez *et al.*, 2016). In addition, the  
86 tolerance to abiotic stress of *A. donax* has been already demonstrated across a range of  
87 stressful conditions, thus allowing the exploitation of degraded and marginal lands with *A.*  
88 *donax* crops (Calheiros *et al.*, 2012; Nackley and Kim, 2015). In fact, *A. donax* is able to  
89 maintain a high leaf-level photosynthesis and biomass gain under drought (Haworth *et al.*,  
90 2017b) and salinity (Nackley and Kim, 2015). In particular, efficient stomata regulation in  
91 *A. donax* is induced by increase in leaf ABA content in response to drought (Haworth *et al.*,  
92 2018). Moreover, *A. donax* is able to adjust the xylem vessel size to regulate the  
93 vulnerability to embolism under water deficit conditions (Haworth *et al.*, 2017c). Recently, it  
94 has been shown that symbiosis with arbuscular mycorrhiza increases *A. donax*  
95 performance to salinity, through proline accumulation and isoprene formation (Pollastri *et al.*,  
96 2018).

97 *A. donax* leaves constitutively produce a large amount of isoprene (Velikova *et al.*, 2016),  
98 which is known to be involved in mechanisms of protection against abiotic (Vickers *et al.*,  
99 2009) and biotic stresses (Loivamäki *et al.*, 2008). However, there is no clear pattern in  
100 isoprene emission in response to abiotic stress in reeds, as isoprene emission increased  
101 in *A. donax* following drought (Haworth *et al.*, 2017a), decreased in *Phragmites australis*  
102 (the common reed, and a close relative of *Arundo*) plants exposed to high P  
103 concentrations (Fares *et al.*, 2006), and was unaltered in salt-stressed *A. donax* (Pollastri  
104 *et al.*, 2018).

105 In this study, *A. donax* plants grew under controlled laboratory conditions by providing a  
106 nutrient solution deprived of P, or enriched with a high concentration of P also in  
107 combination with high concentrations of sodium chloride (NaCl). Our investigation aimed  
108 at: a) characterizing the response of *A. donax* plants to P availability, both under P-  
109 deficiency and supply of high P concentration; b) testing the performance of *A. donax*  
110 under multiple (abiotic) stresses, such as a simultaneous excess of P and Na<sup>+</sup>. To this  
111 purpose, we used an integrated approach, combining physiological and biochemical  
112 measurements with transcriptomic analysis. Leaf and root transcriptomes of *A. donax* have  
113 been recently explored only in healthy plants (Sablok *et al.*, 2014) and in plants exposed to  
114 drought stress (Fu *et al.*, 2016; Evangelistella *et al.*, 2017). Understanding, at molecular  
115 level, the response of *A. donax* to combined P and Na<sup>+</sup> stress is crucial for implementing  
116 adaptation strategies in order to achieve high biomass yield and productivity in marginal  
117 areas for agriculture.

118

## 119 **Materials and methods**

120

### 121 **Plant material, growth conditions, supply of P and Na<sup>+</sup>**

122 *A. donax* plants were propagated from rhizomes of plants collected in Sesto Fiorentino  
123 (Italy). Rhizomes were kept in tap water for one day (d) and then planted in 6 dm<sup>3</sup> pots  
124 containing quartz sand. All potted plants were then grown in a climatic chamber under  
125 controlled environmental conditions (temperature ranging between 24°C and 26°C; relative  
126 air humidity ranging between 40% and 60%; photosynthetic photon flux density (PPFD) of  
127 700 μmol m<sup>-2</sup> s<sup>-1</sup> for 14 h per d), and were regularly watered twice a week with half strength  
128 Hoagland solution (Hoagland and Arnon, 1950) for two months before beginning the  
129 experiment.

130 The experiment was performed by applying five different nutrient conditions: 1) Hoagland  
131 solution (C); 2) Hoagland solution deprived of phosphorous (-P); Hoagland solution  
132 complemented with 8.0 mM  $\text{KH}_2\text{PO}_4$  (+P); Hoagland solution complemented with 200 mM  
133 NaCl (+Na); and Hoagland solution complemented with both 200 mM NaCl and 8.0 mM  
134  $\text{KH}_2\text{PO}_4$  (+NaP). All different solutions were supplied twice a week during the whole  
135 duration of the experiment (43 days).

136

### 137 **Biometrical traits, leaf determination of C, N, P and $\text{Na}^+$**

138 Biometrical traits (leaf number and culm length) were measured weekly. The relative water  
139 content (RWC) of leaves was determined on the second fully expanded leaf at the end of  
140 the treatment. Fresh weight (FW) was immediately determined following leaf collection.  
141 The same leaf was then immersed into water for 24 h before measuring the turgid weight  
142 (TW). Finally, the leaf was oven dried at 80°C for 48 h before measuring the dry weight  
143 (DW). RWC was calculated by using the formula:

$$144 \text{ RWC} = (\text{FW} - \text{DW}) / (\text{TW} - \text{DW}).$$

145 Total C and total N concentrations (%) were quantified at the end of the treatment with a  
146 Carlo Erba NA 1500 CNS Analyzer (Milan, Italy) through the chromatographic column by a  
147 thermal conductivity detector.

148  $\text{Na}^+$  and P concentrations were determined at the end of the treatment.  $\text{Na}^+$  concentration  
149 was measured by flame atomic absorption spectrometry (Analyst 200, Perkin Elmer), and  
150 P concentration was measured by inductively coupled plasma atomic emission  
151 spectrometry (ICP-AES; iCAP 6500 Duo; ThermoFisher, Dreieich, Germany), employing  
152 appropriate quality standard controls (Sreenivasulu *et al.*, 2017).

153

### 154 **$\text{CO}_2/\text{H}_2\text{O}$ gas exchange, fluorescence and isoprene measurements**

155 Gas exchange of CO<sub>2</sub> and H<sub>2</sub>O and fluorescence measurements were performed at the  
156 end of the treatment by using a portable gas exchange system equipped with a  
157 fluorometer (Li-Cor 6400, Li-Cor Biosciences Inc., NE, USA). The third (from the shoot  
158 apex) fully expanded leaf of *A. donax* was clamped in the 2 cm<sup>2</sup> Li-Cor cuvette and  
159 exposed to a saturating PPFD of 1000 μmol m<sup>-2</sup> s<sup>-1</sup>, CO<sub>2</sub> concentration of 400 ppm,  
160 temperature of 30°C and relative humidity (RH) ranging between 45 and 50%.  
161 Photosynthesis (A), stomatal conductance (g<sub>s</sub>) and internal CO<sub>2</sub> concentration (C<sub>i</sub>) were  
162 calculated using the formulations of von Caemmerer and Farquhar (1981) 10 min after  
163 reaching steady-state conditions. The linear electron transport rate (ETR) was calculated  
164 from fluorescence measurements of PSII efficiency, according to Genty *et al.* (1989).  
165 Photosynthesis under low O<sub>2</sub> conditions was measured reducing the air O<sub>2</sub> concentration  
166 from 21% to 2%. We used a nitrogen cylinder connected with a mass flow controller  
167 (Rivoira, Italy) that precisely enriched the concentration of N<sub>2</sub> in the air entering the LI-Cor  
168 6400 from 89 to 99%, while CO<sub>2</sub> concentration was maintained steady at 400 ppm. The O<sub>2</sub>  
169 inhibition of photosynthesis was calculated from the A values measured at 21% and at 2%  
170 of O<sub>2</sub> (v/v) using the following formula (Zhang *et al.*, 2017):  
171 
$$\text{O}_2 \text{ inhibition of photosynthesis} = (A_{2\% \text{ O}_2} - A_{21\% \text{ O}_2}) * 100 / A_{2\% \text{ O}_2}.$$
  
172 Isoprene emitted by leaves was collected at the end of the treatment after concentrating 3  
173 L of the air exiting from the cuvette in a cartridge filled with 30 mg of Tenax and 30 mg of  
174 Carboxen (Gerstel, Mülheim an der Ruhr, Germany). A pump (Elite 5; A.P. Buck, Orlando,  
175 FL, USA) set at 200 ml min<sup>-1</sup> rate was used to fill cartridges with the same volume of air  
176 without contamination from air that did not pass through the cuvette. All cartridges were  
177 stored at 4°C before being analysed through thermo-desorption followed by gas  
178 chromatograph-electro impact mass spectrometry (7890 GC – 5975 MSD 8 Agilent Tech,  
179 Santa Clara, CA, USA), as reported in Pollastri *et al.* (2018). Isoprene was identified by



180 using the NIST 11.L 08 library spectral database and quantified with an isoprene gas  
181 standard (99.9%, Sigma-Aldrich) prepared in the laboratory.

182 During isoprene collection, a charcoal filter (Supelco, Bellafonte, USA) was placed ahead  
183 of the Li-Cor 6400 in order to remove all volatile organic compounds (including isoprene)  
184 from ambient air before reaching the gas exchange cuvette. Isoprene background was  
185 measured every day before starting the measurements by collecting 3 L of air the air  
186 exiting the empty cuvette.

187

### 188 **RNA sequencing**

189 The first leaf was collected at the end of the treatment for RNA extraction and stored at -  
190 80°C. RNA extraction was done with TRIzol® Reagent (Ambion). RNA concentrations and  
191 quality were determined with NanoDrop spectrophotometer (Thermo Scientific,  
192 Wilmington, USA) and Agilent 2100 Bioanalyzer (Agilent, Santa Clara, CA). According to  
193 RNA quality and quantity, three out of four samples for each treatment were chosen for  
194 RNA sequencing and sent to the HuGeF sequencing service (<http://www.hugef-torino.org>,  
195 Human Genetics Foundation, Turin, Italy). A total of 15 paired-end libraries (2x75bp) were  
196 constructed using the TruSeq RNA library Prep Kit v2 (Illumina, San Diego, CA) with poly-  
197 A enrichment and sequenced on Illumina NextSeq 500. Raw data have been deposited in  
198 the Sequence Read Archive (<https://www.ncbi.nlm.nih.gov/sra>) with SRA accession  
199 SRP145569. Assessment of read quality metrics was carried out with FastQC software  
200 (<http://www.bioinformatics.babraham.ac.uk/projects/fastqc/> version 0.11.3). Quality  
201 filtering, adapter cutting and trimming were carried out with Trimmomatic (version 0.33)  
202 (Bolger *et al.*, 2014), which can handle fastqc paired-end synchronization. After Illumina  
203 adapters clipping, the first 12 bases were trimmed due to sequencing biases (Hansen *et*  
204 *al.* 2010), leading and trailing low quality (below 3) or N bases and reads with low average

205 quality (15) in a 4-bases scan were removed. Finally, reads less than 36 bases long after  
206 these steps were dropped.

207 Trinity software (version 2.0.6) was used for transcripts reconstruction. Contigs less than  
208 200 bp and with coverage less than 5 were discarded (Haas *et al.* 2013). Transcripts  
209 redundancy was reduced with CD-HIT software (version 4.6.6), using a word size of 10  
210 and 95% identity (Li and Godzik, 2006). Trinity software was able to assemble a total of  
211 184,849 transcripts (Table S1). After removing redundancy, we obtained a total of 120,553  
212 transcripts. The quality of our reconstructed transcriptome was tested mapping each  
213 paired-end library against it; the percentage of reads mapping back to transcriptome  
214 (RMBT) were between 78.66% and 89.87%, perfectly concordant with the expected  
215 percentage for RNA-seq experiment. In fact, because of the lack of a reference genome,  
216 the percentage of multimapping appears greater than single mapping (Table S2). Based  
217 on these results, the assembled transcriptome was considered reliable as reference for  
218 differential expression analysis.

219

## 220 **Identification of differentially expressed genes (DEGs), functional annotation and** 221 **enrichment analysis**

222 Reads from each of the 15 libraries were mapped against our reference transcriptome and  
223 quantified using RSEM (version 1.3.0) (Li and Dewey, 2011). The quantification was  
224 obtained as fragment per kb of exon per million fragments mapped (FPKM). In order to  
225 identify the differentially expressed genes, Trinity provided scripts based on the R package  
226 edgeR (R version 3.3.2; edgeR version 3.16.5) were used. Pairwise comparisons were  
227 made to highlight different expression in different conditions. Genes with a false discovery  
228 rate cutoff of 0.05 (5% FDR) were considered as differentially expressed.

229 To annotate the genes, blastx searches were performed against NCBI non-redundant  
230 database with an e-value cut-off of  $1e^{-3}$ . Blastx results, saved as xml files, were loaded into

231 Blast2GO tool (version 4.1; database Germany, DE3, version b2g\_jan17) (Conesa and  
232 Götz, 2008), and mapping, annotation and InterPro scanning were performed. To  
233 associate annotations obtained with Blast2GO to DEGs, the R package Annotation Tools  
234 (version 1.44.0) was used (Kuhn *et al.*, 2008). GO enrichment analysis of DEGs was  
235 performed on Blast2GO applying Fisher's Exact Test with a FDR of 0.05. Pathways  
236 enrichment analysis of DEGs was carried out with KOBAS tool (v3.0) (Xie *et al.*, 2011)  
237 using *Oryza sativa* var. *japonica* as reference. Pathways were visualized with KEGG  
238 Mapper, a collection of tools for KEGG mapping (Kanehisa *et al.*, 2016).

239

#### 240 **Quantification of metabolites**

241 Soluble carbohydrates were identified and quantified by HPLC-RI analysis at the end of  
242 the treatment following the protocol of Tattini *et al.* (1996). Starch was quantified as  
243 reported in Chow and Landhäusser (2004) on the pellet resulting from ethanol extraction  
244 for the analysis of soluble carbohydrates. Glucose was quantified through peroxidase-  
245 glucose oxidase/o-dianisidine reagent (Sigma-Aldrich, Milano, Italy), reading the  
246 absorbance at 525 nm after the addition of sulfuric acid.

247 Hydrogen peroxide was measured spectrophotometrically at the end of the treatment after  
248 reaction with KI, according to a slightly modified method (Alexieva *et al.*, 2001). A  
249 modification of the Sedlak and Lindsay (1968) method was used for the glutathione (GSH)  
250 determination at the end of the treatment. Individual carotenoids were identified and  
251 quantified at the end of the treatment as reported in García-Plazaola and Becerril (1999).  
252 Phenylpropanoids were extracted and purified at the end of the treatment following the  
253 protocol of Tattini *et al.* (2004). Abscisic acid (ABA) was extracted and quantified at the  
254 end of the treatment using the protocol of López-Carbonell *et al.* (2009).

255

256 **Hydrogen peroxide (H<sub>2</sub>O<sub>2</sub>) localization and leaf ultrastructure by Transmission**  
257 **Electron Microscopy (TEM)**

258 Hydrogen peroxide localization in leaves was estimated cytochemically via determination  
259 of cerium perhydroxyde upon reaction of cerium chloride (CeCl<sub>3</sub>) with endogenous H<sub>2</sub>O<sub>2</sub>,  
260 following the protocols of Bestwick *et al.* (1997) and Ranieri *et al.* (2003). At the end of the  
261 treatment, portion of approximately 0.15 mm<sup>2</sup> were sampled in the center of the leaf blade  
262 and then infiltrated (under vacuum) with 5 mM CeCl<sub>3</sub> in 50 mM 3-(N-morpholino)-propane  
263 sulfonic acid (pH 7.2). The CeCl<sub>3</sub>-treated and control leaf samples (without CeCl<sub>3</sub>-staining)  
264 were then fixed in 2.5% glutaraldehyde, in 0.2 M phosphate buffer (pH 7.2) for 1 h, and  
265 washed twice with the same buffer, prior of post-fixing with 2% osmium tetroxide in  
266 phosphate buffer (pH 7.2). Leaves were dehydrated in a graded ethanol series (30, 40, 50,  
267 70, 90 and 100%), and gradually embedded in Spurr Resin (Sigma Aldrich). Ultrathin  
268 sections were obtained on an LKB IV ultramicrotome, mounted on Formvar coated copper  
269 grids, stained with UranyllessEm Stain (Electron Microscopy Science) and lead citrate, and  
270 examined by using Philips CM12 transmission electron microscope (Philips, Eindhoven,  
271 The Netherlands) operating at 80 kV.

272

273 **Statistical analyses**

274 Analysis of variance (ANOVA) was applied to test the effect of Na<sup>+</sup> and P supply in *A.*  
275 *donax* plants. LSD post-hoc test was applied to assess significantly different means  
276 among treatments (P < 0.05 level).

## 277 **RESULTS**

### 278 **Plant biometrics, gas exchange, chlorophyll fluorescence measurements and** 279 **isoprene emission**

280 At the end of the experiment, P concentration doubled in +P leaves, but did not decrease  
281 significantly in -P leaves, as compared to control (Table 1). In leaves of +Na plants,  
282 sodium (Na<sup>+</sup>) was two orders of magnitude higher than in control. When Na<sup>+</sup> and P were  
283 both provided in excess (+NaP), an increase of Na<sup>+</sup> and a slightly reduced accumulation of  
284 P, in comparison to leaves of +Na and +P plants, respectively, was observed.

285 Excess supply of Na<sup>+</sup> reduced culm length, number of leaves, leaf RWC, and leaf carbon  
286 content with respect to control (Table 1). P starvation reduced culm height, leaf number  
287 and nitrogen concentration, while P excess did not significantly affect any of the  
288 investigated parameters. However, in +NaP plants, culm length, number of leaves, leaf  
289 RWC and carbon content decreased to the same extent as in the +Na plants, with respect  
290 to control (Table 1).

291 Photosynthesis of *A. donax* decreased in -P, whereas it was similar to control in +P plants  
292 (Table 2). Photosynthesis was inhibited in +Na plants with respect to control, and the  
293 effect was even stronger in +NaP plants. In both +Na and +NaP plants, photosynthesis  
294 reduction was associated to reduced  $g_s$ ,  $C_i$ , and ETR, compared to control (Table 2).

295 Isoprene emission from *A. donax* leaves was not affected by lack of P but was inhibited in  
296 +P plants, in comparison to control (Table 2). Isoprene emission was slight, but non  
297 statistically significant, stimulated by the +Na and +NaP treatments. (Table 2).

298

### 299 **Analysis of differentially expressed genes (DEGs)**

300 Exposure to high P concentration induced differences in the expression of a higher  
301 number of genes in *A. donax* leaves with respect to P starvation (Fig. 1, Table 3). The  
302 excess supply of P caused the differential expression of a similar number of up- and down-

303 regulated genes, while the  $-P$  treatment mainly induced gene down-regulation. High  
304 concentration of  $Na^+$  had a higher impact on the total amount of DEGs (Fig. 1, Table 3),  
305 resulting in a higher extent of down-regulated genes with respect to high P treatment (Fig.  
306 2). However, the number of DEGs increased 10-fold in +NaP treated plants (Fig. 1, Table  
307 3) indicating, at molecular level, a higher response of *A. donax* to the combined ( $Na^+$  and  
308 P) than to the singularly applied treatments (Fig. 1, Fig. 2, Table 3). The complete list of  
309 DEGs is reported in Table S3.

310 In order to functionally inspect the overall DEGs and identify the major biological  
311 processes affected by the different supply of P and  $Na^+$ , the transcriptome of *A. donax*  
312 leaves was annotated by mean of Gene Ontology (GO). More than half of the transcripts  
313 were annotated to at least one GO term (Fig. S1) and the first ten top-hit species found  
314 through the blastx search belonged to the *Poaceae* family (Fig. S2), indicating the  
315 reliability of the obtained GO annotation.

316 As a result of the GO category enrichment analysis (considering a p-value threshold of  
317 0.05), only one functional category ('*catalytic activities*') was significantly over-represented  
318 in  $-P$ . Whereas, the over-represented categories were 33 (especially '*metabolic*  
319 *processes*' and '*localization and transport*') in +P, 38 (especially '*metabolic and*  
320 *biosynthetic processes*' involving '*protein binding*', '*translocation and transportation*', as  
321 well as '*catalytic activities*' and '*biological processes of the extracellular region*') in +Na,  
322 and 139 (especially '*cellular, metabolic and biosynthetic processes of macromolecules and*  
323 *organic compounds*' and '*binding activities*', also involving the '*development of anatomical*  
324 *structure*' and the '*organization of cellular (and intercellular) parts and organelles*', as well  
325 as '*changes in the extracellular region*') in +NaP plants. A complete overview of all the  
326 over-represented functional categories is shown in Table S4.

327

328 **Quantification of soluble carbohydrates and starch, photosynthetic pigments,**  
329 **abscisic acid (ABA), hydrogen peroxide (H<sub>2</sub>O<sub>2</sub>), glutathione (GSH) and caffeic acid**  
330 **derivative**

331 Carbohydrate biosynthesis was impaired by different supply of P. However, a reduction of  
332 starch content was found in +P leaves, while in -P leaves the content of sucrose, fructose  
333 and non-structural carbohydrates was reduced compared to control (Table 4). DEG  
334 analysis showed that genes coding for ADP-glucose pyrophosphorylase, soluble acid  
335 invertases and a sucrose-phosphate synthase, involved in starch and sucrose metabolism  
336 pathway, were down-regulated in both treatments (Table S5). On the opposite, in +Na  
337 leaves the content of sucrose doubled compared to control, and +NaP treatment further  
338 increased the sucrose content and enhanced two-fold the contents of glucose, fructose,  
339 non-structural carbohydrates and starch, compared to control (Table 4). Moreover,  
340 pathway analysis on +NaP plants revealed an up-regulation of genes coding for enzymes  
341 involved in fructose and glucose synthesis (Table S5, Fig. S3B).

342 In +Na and +NaP leaves, leaf ABA content increased two-fold with respect to control (Fig.  
343 3C). In these same leaves, molecular analysis showed a down-regulation of the gene  
344 coding for the ABA 8-hydroxylase 3, a key enzyme in ABA catabolism (Table S3).  
345 However, three ABA stress-ripening coding genes, involved in response to abiotic stress,  
346 were induced in +NaP plants (Table S3).

347 Hydrogen peroxide (H<sub>2</sub>O<sub>2</sub>) and glutathione (GSH) highly accumulated in +NaP plants with  
348 respect to all the other treatments (Fig. 3A, B). Consistent with these observations, genes  
349 involved in the glutathione metabolism were more up-regulated in +NaP leaves than in +P  
350 leaves (Fig. S3E, Fig. S3F).

351 The content of flavonoids was significantly enhanced in +NaP leaves, while the other  
352 treatments caused only a moderate increase of these secondary metabolites, with respect  
353 to control (Fig. 3). The pathway of flavonoids biosynthesis was significantly perturbed in

354 +NaP plants. Indeed, genes like flavonol synthase, trans-cinnamate 4-monooxygenase,  
355 flavonoid 3'-monooxygenase and chalcone synthase were up-regulated in +NaP plants  
356 with respect to control (Fig. S3C, Fig. S3D).

357 Zeaxanthin and  $\beta$ -carotene were enhanced in +Na leaves with respect to control, whereas  
358 zeaxanthin and acid caffeic derivatives were further stimulated in +NaP plants (Fig. 3C, D,  
359 E, F). Although there was no differential regulation in genes involved in zeaxanthin and  $\beta$ -  
360 carotene synthesis in +Na leaves, a down-regulation of lycopene  $\beta$ -cyclase and phytoene  
361 synthase, genes responsible for  $\beta$ -carotene synthesis was measured in +NaP plants  
362 (Table S3).

363

#### 364 **Transmission electron microscopy images of leaves ultrastructure**

365 The ultrastructure of *A. donax* control leaves highlighted a peripheral location of  
366 organelles, and a large vacuole in the center of the cells (Fig. 4). Cytoplasmic organelles  
367 (nucleus, mitochondria, vacuole, endoplasmic reticula, Golgi apparatus) showed typical  
368 structure and distribution, and chloroplasts had distinct granal and stromal thylakoid  
369 arrangement and a well-defined stroma matrix where few and little starch grains were  
370 present (Fig. 4B).

371 In +P plants, chloroplasts displayed very little or no starch grains (Fig. 4C), confirming the  
372 decrease of starch also reported in Table 3. These cells showed more and bigger  
373 plastoglobules than those of control plants (Fig. 4C). In addition, the envelope membrane  
374 of few +P chloroplasts appeared damaged, with thylakoids not clearly recognizable (Fig.  
375 4C). Some +P cells also had wavy plasma membrane, large peroxisomes (Fig. 4D), and  
376 electron dense cerium perhydroxide precipitates in the cell walls after treatment with  
377  $\text{CeCl}_3$ , thus indicating the onset of ROS accumulation and stressful conditions (Fig. 4C;  
378 4D).



379 Chloroplasts of -P leaves were characterized by an extensive system of grana and stroma  
380 lamellae (also reported by Hall et al., 1972), filling the stroma, that also contained a  
381 moderate number of plastoglobules (Fig. 4E). The nucleus of -P cells showed poorly  
382 condensed chromatin. Moreover, deposition of  $\text{CeCl}_3$  was found in cell walls (Fig. 4F) and  
383 in bundle sheath cells.

384 In leaves of +Na plants, the shape of the cells changed from elliptical to wrinkle elongated,  
385 and cell walls appeared curled (indicated by arrows in Fig. 5A). Strong local  $\text{H}_2\text{O}_2$   
386 accumulation in the cell walls (indicated by the black arrow in Fig. 5B) and large  
387 cytoplasmic lipid bodies (Fig. 5B) were detectable in some +Na cells. Moreover, some  
388 mesophyll cells were destroyed, and cytoplasmic organelles were no longer recognizable  
389 except for swollen or disintegrated chloroplast (Fig. 5C). However, chloroplasts of +Na  
390 cells that were still visible showed a wavy outline (indicated by the white arrow in Fig. 5B),  
391 significant loss of clear stromal matrix, with swelling and curling thylakoids, and an  
392 increased number of plastoglobules (Fig. 5A, 5B). In addition, many peroxisomes with  
393 scarce electron dense deposits of  $\text{CeCl}_3$  were observed (data not shown).

394 Mesophyll cells of +NaP plants contained chloroplasts with numerous and large  
395 plastoglobules and very large starch granules (Fig. 5D), matching the reported increase of  
396 starch (Table 3) and carotenoid (i.e., zeaxanthin) content of these leaves (Fig. 2E). Large  
397 lipid bodies were also present in the cytoplasm of these cells, and  $\text{CeCl}_3$  deposits were  
398 observed in chloroplasts, peroxisomes and mitochondria (Figs. 5E; 5F).

399

## 400 Discussion

### 401 Performance of *Arundo donax* grown under high- or low- concentration of 402 phosphorus (P)

403 A two-fold increase of P in the leaves of *A. donax* approached toxic levels, as confirmed by  
404 early symptoms of alteration of cell ultrastructure and the presence of peroxisomes (Fig.  
405 4D), indicating starting oxidation processes. However, high P concentrations did not  
406 hamper *A. donax* growth and photosynthesis (Table 1). Tolerance of photosynthesis to  
407 high P concentration could be the result of the tight regulation of P homeostasis within the  
408 cytoplasm, due to the activation of mechanisms that transport and store the excess of P  
409 into the vacuoles (Mimura *et al.*, 1990). However, excess of P strongly decreased starch  
410 accumulation in leaves (Table 4), as confirmed by histological observations (Fig. 4C, D).  
411 Our transcriptomics results indicate that the inhibition of starch metabolism in *A. donax*  
412 exposed to +P was mainly due to the transcriptional repression of the ADP-glucose  
413 pyrophosphorylase, rather than by enhanced translocation of triosephosphates, that  
414 reduces the availability of these substrates for starch synthesis in the chloroplasts  
415 (Pozueta-Romero *et al.*, 1991; Heldt *et al.*, 1991). Moreover, in +P plants there was a  
416 strong induction of few transcripts coding for cytosolic fructose-1,6- bisphosphatase an  
417 enzyme that, by catalyzing the first irreversible reaction that turn fructose-1,6-bisphosphate  
418 into fructose-6-phosphate and inorganic phosphate (Ladrör *et al.*, 1990), plays an  
419 important regulatory role in carbohydrates biosynthesis and metabolism (Daie, 1993).  
420 Consistently with previous results (Fares *et al.*, 2008) and a recent meta-analysis  
421 (Fernández-Martínez *et al.*, 2017), leaves of +P plants emitted less isoprene than control  
422 and -P plants. Although isoprene production is a highly ATP demanding process (Loreto  
423 and Sharkey 1990), exposure to high P concentration may prompt a competition between  
424 mitochondrial respiration and the methylerythritol 4-phosphate (MEP) pathway, in turn  
425 limiting isoprene biosynthesis (Loreto *et al.*, 2007). In particular, phosphoenolpyruvate

426 (PEP) is a substrate for both isoprene biosynthesis and mitochondrial respiration.  
427 Mitochondrial respiration was likely stimulated in plants grown at high P concentration  
428 (Fares *et al.* 2008). Indeed, we observed an increased transcription of genes involved in  
429 energy requiring processes of protein production and export (Fig. S3). Therefore, our  
430 results seem to indicate that incorporation of P into PEP, principally serving the respiratory  
431 metabolism, made it less available for isoprene production.

432 *A. donax* was sensitive to P deficiency. Although 43 days of P starvation did not  
433 significantly decrease the leaf P concentration, in -P leaves the expression of numerous  
434 genes was down-regulated (Müller *et al.*, 2007; Hernández *et al.*, 2007) and the  
435 ultrastructure of leaf cells was altered. Further results confirmed that, under reduced P  
436 availability, *A. donax* reduces photosynthesis, grows shorter, and produces a lower  
437 number of leaves (with reduced N content) than plants grown under normal P availability.  
438 Sensitivity to low P availability may affect the capacity of *A. donax* to colonize new habitats  
439 (Wassen *et al.*, 2005), and limits *A. donax* use for biomass production in poorly fertile soils.

440

#### 441 **Different response of *A. donax* to Na<sup>+</sup> stress, and to synergistic action of high Na<sup>+</sup>** 442 **and P**

443 Accumulation of Na<sup>+</sup> in leaves affected stomatal conductance by increasing diffusive  
444 limitations of photosynthesis (the acquisition of CO<sub>2</sub> to be assimilated), as further  
445 confirmed by low values of Ci. This response to high Na<sup>+</sup> concentrations widely occurs  
446 across plant species (Delfine *et al.*, 1999; Centritto *et al.*, 2003). Stomata closure was  
447 likely triggered by increased synthesis of ABA upon salinity stress (Wilkinson and Davies,  
448 2002; Seiler *et al.*, 2011). In leaves of Na<sup>+</sup>-stressed *A. donax*, photosynthesis and ETR  
449 were strongly reduced, whereas zeaxanthin and β-carotene were largely synthesized. This  
450 suggests the onset of coordinated photochemical processes to inhibit the accumulation of  
451 reactive oxygen species (ROS). Salinity stress also stimulated the biosynthesis of sucrose

452 in *A. donax* leaves (Table 4), as also confirmed by the significant over-representation of  
453 GO categories related to '*carbohydrate metabolic process*' (Table S4). Beside exerting a  
454 signaling role (Park *et al.*, 2016), sucrose was likely able to balance the drop in osmotic  
455 potential as leaf RWC decreases during progressive exposure to salinity stress (Table 1).  
456 However, changes observed to the leaf ultrastructure of Na<sup>+</sup>-stressed plants, where only  
457 some mesophyll cells and chloroplast resulted completely destroyed (Fig. 5), confirmed  
458 that *A. donax* is moderately sensitive to high Na<sup>+</sup> concentration in leaves. Indeed, *A. donax*  
459 possesses more glycophytic than halophytic features (Nackley and Kim, 2015) and  
460 tolerates salinity through mechanisms that may prevent ROS formation despite  
461 accumulation of Na<sup>+</sup> in the leaves (Mumm and Tester, 2008).

462 Salinity impaired photosynthesis but increased (although not significantly) isoprene  
463 emission from *A. donax* leaves. Isoprene is synthesized from carbon assimilated through  
464 photosynthesis (Delwiche and Sharkey, 1993), but its emission may be also sustained by  
465 extra-chloroplastic carbon sources when photosynthesis is limited under (abiotic) stress  
466 (Brilli *et al.*, 2007; Fortunati *et al.*, 2008). Overall, the simultaneous increases in the  
467 biosynthesis of isoprene and carotenoids may imply activation of the 2-C-methyl-D-  
468 erythritol 4-phosphate (MEP) pathway in +NaP-stressed *A. donax* plants to enhance  
469 protection against stressful condition (Loreto *et al.*, 2014; Marino *et al.*, 2017).

470

471 An additive effect of simultaneous supply of high Na<sup>+</sup> and P concentrations was clearly  
472 highlighted by a 10-fold increase in the number of both up- and down-regulated genes in  
473 leaves of +NaP *A. donax* plants. Some of the most representative transcription factors  
474 already identified in *A. donax* under drought (Fu *et al.*, 2016) were also regulated under  
475 Na<sup>+</sup> and P stress. Among them, NAC was strongly induced in +Na, +P and +NaP, whereas  
476 WRKY 50, 53 and 41 were down-regulated only in +NaP plants. NAC and WRKY genes  
477 family are known to mediate water- (Hadiarto and Tran, 2011) and Na<sup>+</sup>- stress responses,

478 as well as ABA signaling pathway in plants (Jiang *et al.*, 2017). Genes coding for stress-  
479 associated proteins (SAPs) are important regulators of multiple abiotic stress tolerance  
480 (Giri *et al.*, 2013) and found to be induced in water-stressed *A. donax* plants  
481 (Evangelistella *et al.*, 2017). However, only two SAPs were down-regulated in +Na and  
482 +NaP plants. Despite inducing a higher expression of genes involved in abiotic stress  
483 tolerance (e.g., NAC, WRKY and SAP genes), high P concentration exacerbated the  
484 reduction of photosynthesis in Na<sup>+</sup>-stressed *A. donax* plants, as also indicated by the over-  
485 representation of many GO categories related to '*cellular metabolic process*' in +NaP  
486 plants (Table S4). Photosynthesis could have been limited by altered sugar metabolism,  
487 as the amount of non-structural carbohydrates, fructose, glucose and starch increased  
488 two-fold in +NaP plants. It is suggested that combined supply of Na<sup>+</sup> and P strongly  
489 reduced the turnover of carbohydrates, which may have favored the formation of large  
490 starch grains in the chloroplasts (Fig. 5D, E, F). Our results show that increase of starch  
491 biosynthesis in +NaP plants was related (as in +P plants) to the induction of the ADP-  
492 glucose pyrophosphorylase, whereas translocation of triosephosphates was not  
493 significantly affected. However, in +NaP plants photosynthesis was stimulated under low  
494 O<sub>2</sub> conditions, indicating that feedback inhibition of photosynthesis, typically induced by  
495 carbohydrates accumulation (Sharkey, 1990; Xu *et al.*, 2015) did not occur. The  
496 accumulation of carbohydrates induced by P supply in Na<sup>+</sup>-stressed plants may serve  
497 protective purposes, in enhancing osmotic capacity to assimilate water (Lambers *et al.*,  
498 2008) as confirmed by the over-representation of GO categories regarding '*organic*  
499 *substance metabolic process*' in +NaP plants (Table S4). Carbohydrate accumulation may  
500 also help prevent damage to the cell structures (Yang and Guo, 2017). Indeed, the +NaP  
501 treatment induced a SNF1-related protein kinase coding gene (SnRK2), which was also  
502 found to be responsive to both ionic and non-ionic osmotic stressful conditions (Fu *et al.*,  
503 2016; Virilouvet and Fromm, 2015). Genes coding for dehydrins (DHNs) proteins, which

504 play cellular protection in abiotic stress tolerance (Gao and Lan, 2016; Verma *et al.*, 2017),  
505 were also up-regulated in leaves of +NaP plants. Remarkably we also observed that, while  
506 Early Responsive to Dehydration (ERD4) were induced as expected in *Poaceae* (see Fu *et*  
507 *al.*, 2016 for similar finding in drought-stress conditions), two ERD6 genes coding for  
508 carbohydrate transporters were down-regulated, consistent with carbohydrates  
509 accumulation shown in leaves of +NaP plants.

510 Interaction between high concentrations of Na<sup>+</sup> and P did not significantly affect isoprene  
511 emission, which was once again uncoupled from photosynthesis in stressed leaves (Brilli  
512 *et al.*, 2007; Vickers *et al.*, 2009; Marino *et al.*, 2017). The small reduction of isoprene  
513 emission with respect to +P leaves could be associated to the very large negative effect of  
514 the combined treatment (+NaP) on photosynthesis, and to the consequently reduced  
515 photosynthetic substrate entering the MEP pathway. Transcriptomics show up-regulation  
516 of ABA biosynthesis and down-regulation of  $\beta$ -carotene (both made by MEP) in +NaP  
517 compared to +Na leaves. This suggests a rearrangement of the flux of carbon into the  
518 MEP pathway towards hormones controlling stomata movement and away from  
519 antioxidants such as isoprene and carotenoids. Moreover, competition with starch for PEP  
520 could also limit isoprene synthesis in +NaP as well as in +P leaves (see above). However,  
521 starch was not a limiting factor in +NaP leaves as it was in +P leaves. The accumulation of  
522 carbohydrates in +NaP leaves was also highlighted by the over-expression of GO  
523 categories related to '*organic substance metabolic process*' (Table S4), suggesting that a  
524 glucose 6-phosphate shunt might have been activated to increase the availability of  
525 precursors for the MEP pathway (Sharkey and Weise, 2017), despite the low flux of  
526 carbon fixed by photosynthesis.

527 In +NaP leaves, a significant increase of both H<sub>2</sub>O<sub>2</sub> and glutathione (GSH) contents was  
528 observed, and further confirmed in our transcriptome analysis by over-representation of  
529 GO categories '*cellular metabolic process*' and '*organic substance metabolic process*'

530 (Table S4), indicating enhanced ROS formation and activation of the anti-oxidant  
531 metabolism. Moreover, enhanced biogenesis of peroxisomes in +NaP leaf cells (Fig. 5E,  
532 F), most likely indicates a general increase of oxidative stress conditions (Lopez-Huertas  
533 *et al.*, 2000). Peroxisomes contain antioxidants enzymes able to metabolize ROS and to  
534 enhance tolerance to a wide range of stresses (Nyathi and Baker, 2006). High synthesis of  
535 GSH possibly prevents the increase of H<sub>2</sub>O<sub>2</sub> to reach toxic level while allowing this  
536 compound to exert signaling functions (Mittler, 2002; Baxter *et al.*, 2014) that may further  
537 enhance stress response (Knight and Knight, 2001). However, this was clearly insufficient  
538 to protect photosynthesis in +NaP leaves.

539

## 540 **Conclusions**

541 We showed that *A. donax* can be cultivated in marginal soils affected by eutrophication  
542 (under high P supply), where it can exert positive functions (e.g. for phytoremediation)  
543 despite allocating less carbon to defensive secondary metabolites (isoprene). Moreover,  
544 our results highlight that *A. donax* is sensitive to P deficiency and to Na<sup>+</sup> excess, and this  
545 sensitivity is further enhanced by the combination of high Na<sup>+</sup> and high P. However, the  
546 supply of high P concentrations further stimulates, at molecular and biochemical level,  
547 responses that favour stress tolerance in salt-stressed *A. donax*. Therefore, although the  
548 productivity of *A. donax* may be largely impaired, the plant adapts and survives in  
549 unfavourable soils rich in both P and Na<sup>+</sup>.

550

## 551 **Acknowledgements**

552 The study was funded by research project “CROPSTRESS - System performance of non-  
553 food crops to drought stress: development of a plant ideotype”, by the SIR2014 program of  
554 the Italian Ministry of University and Research (RBSI14VV35), Claudia Cocozza is the  
555 scientific leader of the project. We thank for providing the instrumentation needed for

556 isoprene Dr. Marco Michelozzi, Laboratory for the Analysis and Research in Environmental  
557 Chemistry (ARCA), and for Na and P determination Prof. Cristina Gonnelli.

558

#### 559 **Author contributions**

560 CC and BF designed the research, analyzed the data and wrote the article with  
561 contributions of all the authors; PiS, CC, BF performed research; ML, RS, BC, GC, PoS,  
562 MM provided technical assistance; CM, AG, TR, LF supervised and complemented the  
563 writing.

564

#### 565 **Funding information**

566 The study was funded by research project “CROPSTRESS - System performance of non-  
567 food crops to drought stress: development of a plant ideotype”, by the SIR2014 program of  
568 the Italian Ministry of University and Research (RBSI14VV35), CC is the scientific leader of  
569 the project.

570



571 **References**

- 572 **Alexieva V, Sergiev I, Mapelli S, Karanov E.** 2001. The effect of drought and ultraviolet  
573 radiation on growth and stress markers in pea and wheat. *Plant, Cell and Environment* **24**,  
574 1337-1344.
- 575 **Ballicora MA, Iglesias AA, Preiss J.** 2004. ADP-glucose pyrophosphorylase: a regulatory  
576 enzyme for plant starch synthesis. *Photosynthesis Research* **79**, 1-24.
- 577 **Baxter A, Mittler R, Suzuki N.** 2014. ROS as key players in plant stress signalling.  
578 *Journal of Experimental Botany* **65**, 1229–1240.
- 579 **Beck E, Ziegler P.** 1989. Biosynthesis and degradation of starch in higher plants. *Annual*  
580 *Review of Plant Physiology and Plant Molecular Biology* **40**, 95–118.
- 581 **Bestwick CS, Brown IR, Bennett MHR, Mansfield JW.** 1997. Localization of hydrogen  
582 peroxide accumulation during the hypersensitive reaction of lettuce cells to *Pseudomonas*  
583 *syringae* pv *phaseolicola*. *Plant Cell* **9**, 209-221.
- 584 **Bolger AM, Lohse M, Usadel B.** 2014. Trimmomatic: A flexible trimmer for Illumina  
585 Sequence Data. *Bioinformatics* **30**, 2114-20.
- 586 **Beritognolo I, Piazzai M, Benucci S, Kuzminsky E, Sabatti M, Mugnozza GS, Muleo**  
587 **R.** 2007. Functional characterisation of three Italian *Populus alba* L. genotypes under  
588 salinity stress. *Trees* **21**, 465–477.
- 589 **Brilli F, Ciccioli P, Frattoni M, Prestininzi M, Spanedda AF, Loreto F.** 2009.  
590 Constitutive and herbivore-induced monoterpenes emitted by *Populus* × *euroamericana*  
591 leaves are key volatiles that orient *Chrysomela populi* beetles. *Plant, Cell and Environment*  
592 **32**, 542-552.
- 593 **Brilli F, Barta C, Fortunati A, Lerdau M, Loreto F, Centritto M.** 2007. Response of  
594 isoprene emission and carbon metabolism to drought in white poplar (*Populus alba*)  
595 saplings. *New Phytologist* **175**, 244-254.

- 596 **Calheiros CSC, Quiterio PVB, Silva G, Crispim LFC, Brix H, Moura SC, Castro PML.**  
597 2012. Use of constructed wetland systems with *Arundo* and *Sarcocornia* for polishing high  
598 salinity tannery wastewater. *Journal of Environmental Management* **95**, 66–71.
- 599 **Centritto M, Loreto F, Chartzoulakis K.** 2003. The use of low [CO<sub>2</sub>] to estimate  
600 diffusional and non-diffusional limitations of photosynthetic capacity of salt-stressed olive  
601 saplings. *Plant, Cell and Environment* **26**, 585-594.
- 602 **Chaves MM, Flexas J, Pinheiro C.** 2009. Photosynthesis under drought and salt stress:  
603 regulation mechanisms from whole plant to cell. *Annals of Botany* **103**, 551–560.
- 604 **Chow PS, Landhäuser SM.** 2004. A method for routine measurements of total sugar  
605 and starch content in woody plant tissues. *Tree Physiology* **24**, 1129-36.
- 606 **Conesa A, Götz S.** 2008. Blast2GO: A Comprehensive Suite for Functional Analysis in  
607 Plant Genomics. *International Journal of Plant Genomics* doi:10.1155/2008/619832.
- 608 **Daie J.** 1993. Cytosolic fructose-1,6-bisphosphatase: a key enzyme in the sucrose  
609 biosynthetic pathway. *Photosynthesis Research* **38**, 5–14.
- 610 **Ladror US, Latshaw SP, Marcus F.** 1990. Spinach cytosolic fructose1, 6-bisphosphatase.  
611 Purification, enzyme properties, and structural comparisons. *European Journal of*  
612 *Biochemistry* **189**, 89–94.
- 613 **Delfine S, Alvino A, Villani MC, Loreto F.** 1999. Restrictions to CO<sub>2</sub> conductance and  
614 photosynthesis in spinach leaves recovering from salt stress. *Plant Physiology* **119**, 1101–  
615 1106.
- 616 **Delwiche C, Sharkey T.** 1993. Rapid appearance of <sup>13</sup>C in biogenic isoprene when <sup>13</sup>CO<sub>2</sub>  
617 is fed to intact leaves. *Plant, Cell and Environment* **16**, 587–591.
- 618 **Dubey RS, Singh AK.** 1999. Salinity induces accumulation of soluble sugars and alters  
619 the activity of sugar metabolising enzymes in rice plants. *Biologia Plantarum* **42**, 233-239.
- 620 **Evangelistella C, Valentini A, Ludovisi R, Firrincieli A, Fabbrini F, Scalabrin S,**  
621 **Cattonaro F, Morgante M, Scarascia Mugnozza G, Keurentjes JJB, Harfouche A.**

622 2017. De novo assembly, functional annotation, and analysis of the giant reed (*Arundo*  
623 *donax* L.) leaf transcriptome provide tools for the development of a biofuel feedstock.  
624 *Biotechnology Biofuels* **10**, 138.

625 **Fares S, Barta C, Brillì F, Centritto M, Ederli L, Ferranti F, Pasqualini S, Reale L,**  
626 **Tricoli D, Loreto F.** 2006. Impact of high ozone on isoprene emission, photosynthesis and  
627 histology of developing *Populus alba* leaves directly or indirectly exposed to the pollutant.  
628 *Physiologia Plantarum* **128**, 456-465.

629 **Fares S, Brillì F, Noguès I, Velikova V, Tsonev T, Dagli S, Loreto F.** 2008. Isoprene  
630 emission and primary metabolism in *Phragmites australis* grown under different  
631 phosphorus levels. *Plant Biology* **10**, 38-43.

632 **Fernández-Martínez M, Llusà J, Filella I, Niinemets Ü, Arneth A, Wright IJ, Loreto F,**  
633 **Peñuelas J.** 2017. Nutrient-rich plants emit a less intense blend of volatile isoprenoids.  
634 *New Phytology* doi.org/10.1111/nph.14889.

635 **Fernando AL, Barbosa B, Costa J, Papazoglou EG.** 2016. Chapter 4 - Giant Reed  
636 (*Arundo donax* L.): A Multipurpose Crop Bridging Phytoremediation with Sustainable  
637 Bioeconomy. *Bioremediation and Bioeconomy*, Elsevier Inc., 77-95.

638 **Fortunati A, Barta C, Brillì F, Centritto M, Zimmer I, Schnitzler J-P, Loreto F.** 2008.  
639 Isoprene emission is not temperature-dependent during and after severe drought-stress: A  
640 physiological and biochemical analysis. *Plant Journal* **55**, 687-697.

641 **Fredeen AL, Rao IM, Terry N.** 1989. Influence of phosphorus nutrition on growth and  
642 carbon partitioning in *Glycine max*. *Plant Physiology* **89**, 225-230.

643 **Fu Y, Poli M, Sablok G, Wang B, Liang Y, La Porta N, Velikova V, Loreto F, Li M,**  
644 **Varotto C.** 2016. Dissection of early transcriptional responses to water stress in *Arundo*  
645 *donax* L. by unigene-based RNA-seq. *Biotechnology for Biofuels* **9**, 54; DOI  
646 10.1186/s13068-016-0471-8.

- 647 **Gao J, Lan T.** 2016. Functional characterization of the late embryogenesis abundant  
648 (LEA) protein gene family from *Pinus tabuliformis* (*Pinaceae*) in *Escherichia coli*. Scientific  
649 Reports **6**, 19467.
- 650 **Gao QM, Venugopal S, Navarre D, Kachroo A.** 2011. Low oleic acid-derived repression  
651 of jasmonic acid-inducible defense responses requires the WRKY50 and WRKY51  
652 proteins. Plant Physiology **155**, 464-76. doi: 10.1104/pp.110.166876.
- 653 **García-Plazaola JI, Becerril JM.** 1999. A rapid high-performance liquid chromatography  
654 method to measure lipophilic antioxidants in stressed plants: simultaneous determination  
655 of carotenoids and tocopherols. Phytochemical Analysis **10**, 307–313.
- 656 **Gechev TS, Hille J.** 2005. Hydrogen peroxide as a signal controlling plant programmed  
657 cell death. The Journal of Cell Biology **168**, 17–20.
- 658 **Genty B, Briantis JM, Baker NR.** 1989. The relationship between the quantum yield of  
659 photosynthetic electron transport and quenching of chlorophyll fluorescence. Biochimica et  
660 Biophysica Acta **990**, 87–92.
- 661 **Giri J, Dansana PK, Kothari KS, Sharma G, Vij S, Tyagi AK.** 2013. SAPs as novel  
662 regulators of abiotic stress response in plants. BioEssays **35**, 639–48.
- 663 **Haas BJ, Papanicolaou A, Yassour M, Grabherr M, Blood PD, Bowden J, Couger MB,**  
664 **Eccles D, Li B, Lieber M, Macmanes MD, Ott M, Orvis J, Pochet N, Strozzi F, Weeks**  
665 **N, Westerman R, William T, Dewey CN, Henschel R, Leduc RD, Friedman N, Regev**  
666 **A.** 2013. De novo transcript sequence reconstruction from RNA-seq using the Trinity  
667 platform for reference generation and analysis. Nature Protocols **8**, 1494-512.
- 668 **Hadiarto T, Tran LSP.** 2011. Progress studies of drought-responsive genes in rice. Plant  
669 Cell Reports **30**, 297–310.
- 670 **Hall JD, Barr R, Al-Abbas AH, Crane FL.** 1972. The ultrastructure of chloroplasts in  
671 mineral-deficient maize leaves. Plant Physiology **50**, 404–409.

- 672 **Hansen KD, Brenner SE, Dudoit S.** 2010. Biases in Illumina transcriptome sequencing  
673 caused by random hexamer priming. *Nucleic Acids Research* **38**, 131.
- 674 **Haworth M, Catola S, Marino G, Brunetti C, Michelozzi M, Riggi E, Avola G,**  
675 **Cosentino LS, Loreto F, Centritto M.** 2017a. Moderate drought stress induces increased  
676 foliar dimethylsulphoniopropionate (DMSP) concentration and isoprene emission in two  
677 contrasting ecotypes of *Arundo donax*. *Frontiers in Plant Science* **8**, 1016; doi:  
678 10.3389/fpls.2017.01016.
- 679 **Haworth M, Cosentino LS, Marino G, Brunetti C, Scordia D, Testa G, Riggi E, Avola**  
680 **G, Loreto F, Centritto M.** 2017b. Physiological responses of *Arundo donax* ecotypes to  
681 drought: a common garden study. *GCB Bioenergy* **9**, 132-143.
- 682 **Haworth M, Centritto M, Giovannelli A, Marino G, Proietti N, Capitani D, De Carlo A,**  
683 **Loreto F.** 2017c. Xylem morphology determines the drought response of two *Arundo*  
684 *donax* ecotypes from contrasting habitats. *GCB Bioenergy* **9**, 119–131.
- 685 **Haworth M, Marino G, Cosentino LS, Brunetti C, De Carlo A, Avola G, Riggi E, Loreto**  
686 **F, Centritto M.** 2018. Increased free abscisic acid during drought enhances stomatal  
687 sensitivity and modifies stomatal behaviour in fast growing giant reed (*Arundo donax*).  
688 *Environmental and Experimental Botany* **147**, 116-124.
- 689 **Heldt HW, Flügge U-I, Borchert S.** 1991. Diversity of specificity and function of  
690 phosphate translocators in various plastids. *Plant Physiology* **95**, 341–343.
- 691 **Hernández G, Ramírez M, Valdés-López O, Tesfaye M, Graham MA, Czechowski T,**  
692 **Schlereth A, Wandrey M, Erban A, Cheung F, Wu HC, Lara M, Town CD, Kopka J,**  
693 **Udvardi MK, Vance CP.** 2007. Phosphorus stress in common bean: root transcript and  
694 metabolic responses. *Plant Physiology* **144**, 752–767,
- 695 **Hewitt CN, Monson RK, Fall R.** 1990. Isoprene emissions from the grass *Arundo donax*  
696 L. are not linked to photorespiration. *Plant Science* **66**, 139-144.

- 697 **Hoagland DR, Arnon DI.** 1950. The water-culture method for growing plants without soil.  
698 California Agricultural Experiment Station Circural **347**, 1–39.
- 699 **Hu J, Aguirre M, Peto C, Alonso J, Ecker J, Chory J.** 2002. A role for peroxisomes in  
700 photomorphogenesis and development of Arabidopsis. *Science* **297**, 405-9.
- 701 **Ji T, Li S, Huang M, Di Q, Wang X, Wei M, Shi Q, Li Y, Gong B, Yang F.** 2017.  
702 Overexpression of cucumber phospholipase D alpha gene (CsPLD $\alpha$ ) in tobacco enhanced  
703 salinity stress tolerance by regulating Na<sup>+</sup>–K<sup>+</sup> balance and lipid peroxidation. *Frontiers in*  
704 *Plant Science* **8**, 499.
- 705 **Jiang J, Ma S, Ye N, Jiang M, Cao J, Zhang J.** 2017. WRKY transcription factors in plant  
706 responses to stresses. *Journal of Integrative Plant Biology* **2**, 86-101.
- 707 **Kalaji H, Govindjee K, BosaKoscielniak J, Zuk-Golaszewska K.** 2011. Effects of salt  
708 stress on photosystem II efficiency and CO<sub>2</sub> assimilation of two Syrian barley land races.  
709 *Environmental and Experimental Botany* **73**, 64–72.
- 710 **Kanehisa M, Sato Y, Kawashima M, Furumichi M, Tanabe M.** 2016. KEGG as a  
711 reference resource for gene and protein annotation. *Nucleic Acids Research* **44**, D457-  
712 D462
- 713 **Kang J-H, McRoberts J, Shi F, Moreno JE, Jones AD, Howe GA.** 2014. The flavonoid  
714 biosynthetic enzyme chalcone isomerase modulates terpenoid production in glandular  
715 trichomes of tomato. *Plant Physiology* **164**, 1161–1174.
- 716 **Kaur N, Reumann S, Hu J.** 2009. Peroxisome biogenesis and function. In: Somerville CR,  
717 Meyerowitz EM (eds) *The Arabidopsis book*. The American Society of Plant Biologists,  
718 Rockville, MD, USA, pp 1–41.
- 719 **Kerepesi I, Galiba G.** 2000. Osmotic and salt stress-induced alteration in soluble  
720 carbohydrate content in wheat seedlings. *Crop Science* **40**, 482-487.
- 721 **Knight H, Knight MR.** 2001. Abiotic stress signalling pathways: specificity and cross-talk.  
722 *Trends in Plant Science* **6**, 262-267.

- 723 **Ku MSB, Agarie S, Nomura M, Fukayama H, Tsuchida H, Ono K, Hirose S, Toki S,**  
724 **Miyao M, Matsuoka M.** 1999. High level expression of maize phosphoenolpyruvate  
725 carboxylase in transgenic rice plants. *Nature Biotechnology* **17**, 76–80.
- 726 **Kuhn A, Luthi-Carter R, Delorenzi M.** 2008. Cross-species and cross-platform gene  
727 expression studies with the Bioconductor-compliant R package annotation Tools. *BMC*  
728 *Bioinformatics* **9**, 26.
- 729 **Laisk A, Loreto F.** 1996. Determining photosynthetic parameters from leaf CO<sub>2</sub> exchange  
730 and chlorophyll fluorescence (ribulose-1,5-bisphosphate carboxylase/oxygenase specificity  
731 factor, dark respiration in the light, excitation distribution between photosystems,  
732 alternative electron transport rate, and mesophyll diffusion resistance). *Plant Physiology*  
733 **110**, 903–912.
- 734 **Lambers H, Chapin III, Pons FSTL.** 2008. *Plant Physiological Ecology*. 2<sup>nd</sup> edition.  
735 Springer, New York.
- 736 **Li B, Dewey CN.** 2011. RSEM: accurate transcript quantification from RNA-Seq data with  
737 or without a reference genome. *BMC Bioinformatics* **12**, 323.
- 738 **Li W, Godzik A.** 2006. Cd-hit: a fast program for clustering and comparing large sets of  
739 protein or nucleotide sequences. *Bioinformatics* **22**, 1658-1659.
- 740 **Loivamäki M, Mumm R, Dicke M, Schnitzler JP.** 2008. Isoprene interferes with the  
741 attraction of bodyguards by herbaceous plants. *Proceedings of the National Academy of*  
742 *Sciences* **105**, 17211-2.
- 743 **López-Carbonell M, Gabasa M, Jáuregui O.** 2009. Enhanced determination of abscisic  
744 acid (ABA) and abscisic acid glucose ester (ABA-GE) in *Cistus albidus* plants by liquid  
745 chromatography-mass spectrometry in tandem mode. *Plant Physiology and Biochemistry*  
746 **47**, 256-261.
- 747 **Lopez-Huertas E, Charlton W, Johnson B, Graham I, Baker A.** 2000. Stress induces  
748 peroxisome biogenesis genes. *EMBO Journal* **19**, 6770-6777.

- 749 **Loreto F, Sharkey TD.** 1990. A gas exchange study of photosynthesis and isoprene  
750 emission in red oak. *Planta* **182**, 523-531.
- 751 **Loreto F, Delfine S.** 2000. Emission of isoprene from salt-stressed *Eucalyptus globulus*  
752 leaves. *Plant Physiology* **123**, 1605–1610.
- 753 **Loreto F, Centritto M, Barta C, Calfapietra C, Fares S, Monson RK.** 2007. The  
754 relationship between isoprene emission rate and dark respiration rate in white poplar  
755 (*Populus alba* L.) leaves. *Plant, Cell and Environment* **30**, 662-669.
- 756 **Loreto F, Pollastri S, Fineschi S, Velikova V.** 2014. Volatile isoprenoids and their  
757 importance for protection against environmental constraints in the Mediterranean area.  
758 *Environmental and Experimental Botany* **103**, 99–106.
- 759 **Machado RMA, Serralheir RP.** 2017. Soil salinity: effect on vegetable crop growth.  
760 management practices to prevent and mitigate soil salinization. *Horticulturae* **3**, 30;  
761 doi:10.3390/horticulturae3020030.
- 762 **Marino G, Brunetti C, Tattini M, Romano A, Biasioli F, Tognetti R, Loreto F, Ferrini F,**  
763 **Centritto M.** 2017. Dissecting the role of isoprene and stress-related hormones (ABA and  
764 ethylene) in *Populus nigra* exposed to unequal root zone water stress. *Tree Physiology* **37**,  
765 1637-1647.
- 766 **Marschner H.** 1995. Mineral nutrition of higher plants. Second edition, Functions of  
767 Mineral Nutrients: Macronutrient, Academic Press Inc. (Elsevier) **8**, 229–312.
- 768 **Mimura T, Dietz K, Kaiser W, Schramm M, Kaiser G, Heber U.** 1990. Phosphate  
769 transport across biomembranes and cytosolic phosphate homeostasis in barley leaves.  
770 *Planta* **180**, 139–146.
- 771 **Mittler R.** 2002. Oxidative stress, antioxidants and stress tolerance. *Trends in Plant*  
772 *Science* **7**, 405–410.



- 773 **Müller R, Morant M, Jarmer H, Nilsson L, Nielsen TH.** 2007. Genome-wide analysis of  
774 the Arabidopsis leaf transcriptome reveals interaction of phosphate and sugar metabolism.  
775 *Plant Physiology* **143**, 156–171.
- 776 **Munns R, Tester M.** 2008. Mechanisms of Salinity Tolerance. *Annual Review of Plant*  
777 *Biology* **9**, 651-681.
- 778 **Nackley L, Kim SH.** 2015. A salt on the bioenergy and biological invasions debate: salinity  
779 tolerance of the invasive biomass feedstock *Arundo donax*. *GCB Bioenergy* **7**, 752–762.
- 780 **Nackley LL, Vogt KA, Kim SH.** 2014. *Arundo donax* water use and photosynthetic  
781 responses to drought and elevated CO<sub>2</sub>. *Agricultural, Water and Management* **136**, 13–22.
- 782 **Nordberg GF, Fowler B, Nordberg M** (2007). *Handbook on the Toxicology of Metals*.  
783 Third edition. Salt Lake City, UT: Academic Press.
- 784 **Owen S, Peñuelas J.** 2005. Opportunistic emissions of volatile isoprenoids. *Trends in*  
785 *Plant Science* **10** 420-426.
- 786 **Papazoglou EG.** 2007. *Arundo donax* L. stress tolerance under irrigation with heavy metal  
787 aqueous solutions. *Desalination* **211**, 304–313.
- 788 **Parida A, Das AB, Das P.** 2002. NaCl stress causes changes in photosynthetic pigments,  
789 proteins and other metabolic components in the leaves of a true mangrove, *Bruguier*  
790 *aparviflora*, in hydroponic cultures. *Journal of Plant Biology* **45**, 28-36.
- 791 **Park HJ, Kim W-Y, Yun D-J.** 2016. A new insight of salt stress signaling in plant.  
792 *Molecules and Cells* **39**, 447-459.
- 793 **Peñuelas J, Sardans J, Rivas-Ubach A, Janssens IV.** 2012. The human-induced  
794 imbalance between C, N and P in Earth's life system. *Global Change and Biology* **18**, 3–6.
- 795 **Peñuelas J, Poulter B, Sardans J, Ciais P, van der Velde M, Bopp L, Boucher O,**  
796 **Godderis Y, Hinsinger P, Llusia J, Nardin E, Vicca S, Obersteiner M, Janssens IA.**  
797 2013. Human-induced nitrogen–phosphorus imbalances alter natural and managed

798 ecosystems across the globe. *Nature Communications* **4**, 2934, DOI:  
799 10.1038/ncomms3934.

800 **Pilu R, Bucci A, Badone FC, Landoni M.** 2012. Giant reed (*Arundo donax* L.): a weed  
801 plant or a promising energy crop? *African Journal of Biotechnology* **11**, 9163–9174.

802 **Pollastri S, Savvides A, Pesando M, Lumini E, Volpe MG, Ozudogru EA, Faccio A, De**  
803 **Cunzo F, Michelozzi M, Lambardi M, Fotopoulos V, Loreto F, Centritto M, Balestrini**  
804 **R.** 2018. Impact of two arbuscular mycorrhizal fungi on *Arundo donax* L. response to salt  
805 stress. *Planta* **247**, 573–585.

806 **Pompeiano A, Vita F Alpi A, Guglielminetti L.** 2015. *Arundo donax* L. response to low  
807 oxygen stress. *Environmental and Experimental Botany* **111**, 147–154.

808 **Portis AR.** 1992. Regulation of ribulose-1,5-bisphosphate carboxylase/oxygenase activity.  
809 *Annual Review of Plant Physiology and Plant Molecular Biology* **43**, 415-37.

810 **Pozueta-Romero J, Frehner M, Viale AM, Akazawa T.** 1991. Direct transport of ADP  
811 glucose by an adenylate translocator is linked to starch biosynthesis in amyloplasts.  
812 *Proceedings of the National Academy of Sciences* **88**, 5769-5773.

813 **Ramel F, Birtic S, Cuiné S, Triantaphylidès C, Ravanat J-L, Havaux M.** 2012. Chemical  
814 quenching of singlet oxygen by carotenoids in plants. *Plant Physiology* **158**, 1267–1278.

815 **Ranieri A, Castagna A, Pacini J, Baldan B, Mensuali Sodi A, Soldatini GF.** 2003. Early  
816 production and scavenging of hydrogen peroxide in the apoplast of sunflower plants  
817 exposed to ozone. *Journal of Experimental Botany* **54**, 2529-2540.

818 **Rasmussen R.** 2001. Quantification on the Light Cycler instrument. In: Meuer S, Wittwer  
819 C, Nakagawara K, eds. *Rapid Cycle Real-Time PCR: Methods and Applications*.  
820 Heidelberg: Springer-Verlag Press, pp. 21–34.

821 **Rosenstiel TN, Potosnak MJ, Griffin KL, Fall R, Monson RK.** 2003. Increased CO<sub>2</sub>  
822 uncouples growth from isoprene emission in an agriforest ecosystem. *Nature* **421**, 256-  
823 259.

- 824 **Rufty TW Jr., MacKown CT, Israel DW.** 1990. Phosphorus stress effects on assimilation  
825 of nitrate. *Plant Physiology* **94**, 328–333.
- 826 **Sablok G, Fu Y, Bobbio V, Laura M, Rotino GL, Bagnaresi P, Allavena A, Velikova V,**  
827 **Viola R, Loreto F, Li M, Varotto C.** 2014. Fuelling genetic and metabolic exploration of  
828 C3 bioenergy crops through the first reference transcriptome of *Arundo donax* L. *Plant*  
829 *Biotechnology Journal* **12**, 554–567.
- 830 **Sánchez E, Gil S, Azcón-Bieto J, Nogués S.** 2016. The response of *Arundo donax* L.  
831 (C3) and *Panicum virgatum* (C4) to different stresses. *Biomass and Bioenergy* **85**, 335-  
832 345.
- 833 **Sedlak J, Lindsay RH.** 1968. Estimation of total, protein-bound, and nonprotein sulfhydryl  
834 groups in tissue with Ellman's reagent. *Analytical Biochemistry* **25**, 192-205.
- 835 **Seiler C, Harshavardhan VT, Rajesh K, Reddy PS, Strickert M, Rolletschek H, Scholz**  
836 **U, Wobus U, Sreenivasulu N.** 2011. ABA biosynthesis and degradation contributing to  
837 ABA homeostasis during barley seed development under control and terminal drought-  
838 stress conditions. *Journal of Experimental Botany* **62**, 2615–2632.
- 839 **Sharkey TD.** 1990. Feedback limitation of photosynthesis and the physiological role of  
840 ribulose biphosphate carboxylase carbamylation. *Botanical Magazine, Tokyo* **2**, 87–105.
- 841 **Sharkey T, Weise SE.** 2017. The glucose 6-phosphate shunt around the Calvin-Benson  
842 cycle. *Journal of Experimental Botany* **68**, 4067–4077.
- 843 **Sharkey TD, Yeh S.** 2001. Isoprene emission from plants. *Annual Review of Plant*  
844 *Physiology and Plant Molecular Biology* **52**, 407-436.
- 845 **Shen J, Yuan L, Zhang J, Li H, Bai Z, Chen X, Zhang W, Zhang F.** 2011. Phosphorus  
846 dynamics: from soil to plant. *Plant Physiology* **156**, 997–1005.
- 847 **Smith VH, Tilman GD, Nekola JC.** 1999. Eutrophication: impacts of excess nutrient  
848 inputs on freshwater, marine, and terrestrial ecosystems. *Environmental Pollution* **100**,  
849 179-196.

- 850 **Sobhanian H, Aghaei K, Komatsu S.** 2011. Changes in the plant proteome resulting from  
851 salt stress: toward the creation of salt-tolerant crops? *Journal of Proteomics* **74**, 1323–  
852 1337.
- 853 **Sreenivasulu V, Kumar NS, Dharmendra V, Asif M, Balaram V, Zhengxu H, Zhen Z.**  
854 2017. Determination of boron, phosphorus, and molybdenum content in biosludge samples  
855 by microwave plasma atomic emission spectrometry (MP-AES). *Applied Science* **7**, 264;  
856 doi:10.3390/app7030264.
- 857 **Tattini M, Galardi C, Pinelli P, Massai R, Remorini D, Agati G.** 2004. Differential  
858 accumulation of flavonoids and hydroxycinnamates in leaves of *Ligustrum vulgare* under  
859 excess light and drought stress. *New Phytologist* **163**, 547–561.
- 860 **Tattini M, Gucci R, Romani A, Baldi A, Everard JD.** 1996. Changes in non-structural  
861 carbohydrates in olive (*Olea europaea* L.) leaves during root zone salinity stress.  
862 *Physiologia Plantarum* **98**, 117–124.
- 863 **Tiessen H.** 2011. Phosphorus Availability in the Environment. In: eLS. John Wiley & Sons  
864 Ltd, Chichester, doi: 10.1002/9780470015902.a0003188.pub2.
- 865 **Tilman D, Cassman KG, Matson PA, Naylor R, Polasky S.** 2002. Agricultural  
866 sustainability and intensive production practices. *Nature* **418**, 671-677.
- 867 **Velikova V, Brunetti C, Tattini M, Doneva D, Ahrar M, Tsonev T, Stefanova M, Ganeva**  
868 **T, Gori A, Ferrini F, Varotto C, Loreto F.** 2016. Physiological significance of isoprenoids  
869 and phenylpropanoids in drought response of *Arundinoideae* species with contrasting  
870 habitats and metabolism. *Plant, Cell and Environment* **39**, 2185-2197.
- 871 **Verma G, Dhar YV, Srivastava D, Kidwai M, Chauhan PS, Bag SK, Asif MH,**  
872 **Chakrabarty D.** 2017. Genome-wide analysis of rice dehydrin gene family: Its evolutionary  
873 conservedness and expression pattern in response to PEG induced dehydration stress.  
874 *PLoS One* **12**, e0176399.

- 875 **Vickers CE, Gershenzon J, Lerdau MT, Loreto F.** 2009. A unified mechanism of action  
876 for volatile isoprenoids in plant abiotic stress. *Nature Chemical Biology* **5**, 283–291.
- 877 **Virlouvet L, Fromm M.** 2015. Physiological and transcriptional memory in guard cells  
878 during repetitive dehydration stress. *New Phytologist* **205**, 596–607.
- 879 **von Caemmerer S, Farquhar GD.** 1981. Some relationships between the biochemistry of  
880 photosynthesis and the gas exchange of *Phaseolus vulgaris* cultivar Hawkesbury Wonder  
881 leaves. *Planta* **153**, 376–387.
- 882 **Wassen MJ, Venterink HO, Lapshina ED, Tanneberger F.** 2005. Endangered plants  
883 persist under phosphorus limitation. *Nature* **437**, 547-550.
- 884 **Webster RJ, Driever SM, Kromdijk J, McGrath J, Leahey ADB, Siebke K,**  
885 **Demetriades-Shah T, Bonnage S, Peloe T.** 2016. High C3 photosynthetic capacity and  
886 high intrinsic water use efficiency underlies the high productivity of the bioenergy grass  
887 *Arundo donax*. *Scientific Reports* **6**, 20694.
- 888 **Wilkinson S, Davies WJ.** 2002. ABA-based chemical signalling: the coordination of  
889 responses to stress in plants. *Plant, Cell and Environment* **25**, 195–210.
- 890 **Wingler A, Lea PJ, Quick WP, Leegood RC.** 2000. Photorespiration: metabolic pathways  
891 and their role in stress protection. *Philosophical Transactions of the Royal Society B:*  
892 *Biological Sciences* **355**, 1517-1529.
- 893 **Xie C, Mao X, Huang J, Ding Y, Wu J, Dong S, Kong L, Gao G, Li C-H, Wei L.** 2011.  
894 KOBAS 2.0: a web server for annotation and identification of enriched pathways and  
895 diseases. *Nucleic Acids Research* **39**, W316–W322.
- 896 **Xu Z, Jiang Y, Zhou G.** 2015. Response and adaptation of photosynthesis, respiration,  
897 and antioxidant systems to elevated CO<sub>2</sub> with environmental stress in plants. *Frontiers in*  
898 *Plant Science* **6**, 701.
- 899 **Yang Y, Guo Y.** 2017. Elucidating the molecular mechanisms mediating plant salt-stress  
900 responses. *New Phytologist* **217**, 523–539.

- 901 **Zeeman SC, Smith SM, Smith AM.** 2004. The breakdown of starch in leaves. *New*  
902 *Phytologist* **163**, 247–261.
- 903 **Zhang ZS, Liu MJ, Scheibe R, Selinski J, Zhang LT, Yang C, Meng XL, Gao HY.** 2017.  
904 Contribution of the alternative respiratory pathway to PSII photoprotection in C3 and C4  
905 Plants. *Molecular Plant* **10**, 131–142.

**Table 1.** Plant biometrical traits (culm length and leaf number), relative water content (RWC), carbon, nitrogen (N), sodium (Na) and phosphorous (P) contents in leaves of *Arundo donax* plants in control conditions (C), without phosphorous supply (-P), with excess supply of phosphorous (+P) or sodium chloride (+Na), and with excess supply of both phosphorous and sodium chloride (+NaP). Data are means of 4 plants per treatment  $\pm$  SE; different letters indicate statistical difference at  $P < 0.05$  in the same column.

|      | culm length<br>(cm)          | leaf number<br>(n)           | RWC<br>(%)                  | carbon<br>(%)               | N<br>(%)                   | Na<br>( $\mu\text{g g}^{-1}$ DW)  | P<br>( $\mu\text{g g}^{-1}$ DW) |
|------|------------------------------|------------------------------|-----------------------------|-----------------------------|----------------------------|-----------------------------------|---------------------------------|
| C    | 90.8 $\pm$ 2.0 <sup>a</sup>  | 16.0 $\pm$ 0.2 <sup>ab</sup> | 89.6 $\pm$ 2.1 <sup>a</sup> | 42.4 $\pm$ 0.3 <sup>a</sup> | 3.4 $\pm$ 0.2 <sup>a</sup> | 120.9 $\pm$ 23.1 <sup>c</sup>     | 2358.7 $\pm$ 168.4 <sup>c</sup> |
| -P   | 81.54 $\pm$ 2.9 <sup>b</sup> | 15.2 $\pm$ 0.5 <sup>b</sup>  | 90.1 $\pm$ 0.6 <sup>a</sup> | 42.4 $\pm$ 0.3 <sup>a</sup> | 2.9 $\pm$ 0.2 <sup>b</sup> | 103.5 $\pm$ 31.8 <sup>c</sup>     | 1766.7 $\pm$ 154.4 <sup>c</sup> |
| +P   | 91.3 $\pm$ 4.3 <sup>a</sup>  | 16.8 $\pm$ 0.5 <sup>a</sup>  | 91.5 $\pm$ 0.6 <sup>a</sup> | 41.3 $\pm$ 0.6 <sup>a</sup> | 3.7 $\pm$ 0.1 <sup>a</sup> | 151.2 $\pm$ 16.3 <sup>c</sup>     | 5765.4 $\pm$ 403.2 <sup>a</sup> |
| +Na  | 62.6 $\pm$ 3.6 <sup>c</sup>  | 11.5 $\pm$ 0.3 <sup>c</sup>  | 83.0 $\pm$ 2.7 <sup>b</sup> | 40.3 $\pm$ 0.5 <sup>b</sup> | 3.8 $\pm$ 0.1 <sup>a</sup> | 15098.3 $\pm$ 1128.1 <sup>b</sup> | 2100.7 $\pm$ 109.0 <sup>c</sup> |
| +NaP | 66.4 $\pm$ 2.5 <sup>c</sup>  | 10.7 $\pm$ 0.3 <sup>c</sup>  | 82.3 $\pm$ 1.1 <sup>b</sup> | 39.5 $\pm$ 0.1 <sup>b</sup> | 3.4 $\pm$ 0.1 <sup>a</sup> | 17781.4 $\pm$ 1567.9 <sup>a</sup> | 4501.3 $\pm$ 297.2 <sup>b</sup> |

**Table 2.** Photosynthesis (A), O<sub>2</sub> inhibition of photosynthesis (%), stomatal conductance (g<sub>s</sub>), internal CO<sub>2</sub> concentrations (Ci) electron transport rate (ETR), isoprene emission of *Arundo donax* plants in control (C) conditions, without phosphorous supply (-P), with excess supply of phosphorous (+P) or sodium chloride (+Na), and with excess supply of both phosphorous and sodium chloride (+NaP). Data are means of 4 plants per treatment ± SE; different letters indicate statistical difference at P < 0.05 in the same column.

|      | A<br>( $\mu\text{mol m}^{-2} \text{s}^{-1}$ ) | Inhibition of<br>photosynthesis<br>(%) | g <sub>s</sub><br>( $\text{mol m}^{-2} \text{s}^{-1}$ ) | Ci<br>(ppm)           | ETR                   | Isoprene<br>( $\text{nmol m}^{-2} \text{s}^{-1}$ ) |
|------|-----------------------------------------------|----------------------------------------|---------------------------------------------------------|-----------------------|-----------------------|----------------------------------------------------|
| C    | 23.4 ± 1.1 <sup>a</sup>                       | 29.9 ± 3.7 <sup>b</sup>                | 0.32 ± 0.03 <sup>a</sup>                                | 239 ± 11 <sup>a</sup> | 159 ± 5 <sup>a</sup>  | 17.9 ± 2.8 <sup>a</sup>                            |
| -P   | 18.2 ± 0.4 <sup>b</sup>                       | 18.3 ± 2.8 <sup>b</sup>                | 0.24 ± 0.03 <sup>a</sup>                                | 245 ± 16 <sup>a</sup> | 140 ± 7 <sup>a</sup>  | 20.7 ± 4.4 <sup>a</sup>                            |
| +P   | 21.4 ± 1.2 <sup>a</sup>                       | 26.2 ± 2.7 <sup>b</sup>                | 0.30 ± 0.05 <sup>a</sup>                                | 250 ± 11 <sup>a</sup> | 149 ± 6 <sup>a</sup>  | 12.0 ± 2.9 <sup>b</sup>                            |
| +Na  | 12.5 ± 2.0 <sup>c</sup>                       | 48.3 ± 9.5 <sup>a</sup>                | 0.08 ± 0.03 <sup>b</sup>                                | 167 ± 14 <sup>b</sup> | 103 ± 19 <sup>b</sup> | 25.9 ± 5.4 <sup>a</sup>                            |
| +NaP | 4.0 ± 0.5 <sup>d</sup>                        | 49.9 ± 12.2 <sup>a</sup>               | 0.03 ± 0.00 <sup>c</sup>                                | 158 ± 21 <sup>b</sup> | 71 ± 5 <sup>b</sup>   | 20.7 ± 3.3 <sup>a</sup>                            |



1 **Table 3.**

2 Number of differentially expressed genes (DEGs) at 5% FDR; (-P) low phosphorous, (+P)  
3 excess of phosphorous, (+Na) excess of sodium chloride, (+NaP) excess of both  
4 phosphorous and sodium chloride, (C) control condition.

5

|                             | <b>-P vs C</b> | <b>+P vs C</b> | <b>+Na vs C</b> | <b>+NaP vs C</b> |
|-----------------------------|----------------|----------------|-----------------|------------------|
| Up-regulated genes          | 75             | 258            | 243             | 2103             |
| Down-regulated genes        | 234            | 198            | 453             | 3076             |
| <b>Total number of DEGs</b> | <b>309</b>     | <b>456</b>     | <b>696</b>      | <b>5179</b>      |

6

7 **Table 4.** Carbohydrates and starch content in leaves of *Arundo donax* plants in control  
 8 conditions (C), without phosphorous supply (-P), with excess supply of phosphorous (+P)  
 9 or sodium chloride (+Na), and with an excess supply of both phosphorous and sodium  
 10 chloride (+NaP). Data are means of 4 plants per treatment  $\pm$  SE; different letters indicate  
 11 statistical difference at  $P < 0.05$  in the same column.

12

|      | sucrose<br>(mg g <sup>-1</sup> DW) | glucose<br>(mg g <sup>-1</sup> DW) | fructose<br>(mg g <sup>-1</sup> DW) | non-structural<br>carbohydrates<br>(mg g <sup>-1</sup> DW) | starch<br>(mg g <sup>-1</sup> DW) |
|------|------------------------------------|------------------------------------|-------------------------------------|------------------------------------------------------------|-----------------------------------|
| C    | 4.4 $\pm$ 0.4 <sup>c</sup>         | 14.9 $\pm$ 0.5 <sup>b</sup>        | 67.8 $\pm$ 2.9 <sup>b</sup>         | 87.0 $\pm$ 3.6 <sup>b</sup>                                | 5.2 $\pm$ 0.2 <sup>b</sup>        |
| -P   | 3.3 $\pm$ 0.2 <sup>c</sup>         | 11.6 $\pm$ 0.5 <sup>b</sup>        | 45.1 $\pm$ 0.9 <sup>c</sup>         | 60.0 $\pm$ 14.5 <sup>c</sup>                               | 4.8 $\pm$ 0.4 <sup>bc</sup>       |
| +P   | 4.2 $\pm$ 0.3 <sup>c</sup>         | 14.2 $\pm$ 0.9 <sup>b</sup>        | 73.0 $\pm$ 4.6 <sup>b</sup>         | 91.4 $\pm$ 4.2 <sup>b</sup>                                | 1.8 $\pm$ 0.5 <sup>c</sup>        |
| +Na  | 11.4 $\pm$ 0.3 <sup>b</sup>        | 15.0 $\pm$ 0.8 <sup>b</sup>        | 71.4 $\pm$ 1.7 <sup>b</sup>         | 97.8 $\pm$ 2.7 <sup>b</sup>                                | 4.3 $\pm$ 0.3 <sup>b</sup>        |
| +NaP | 14.1 $\pm$ 0.6 <sup>a</sup>        | 37.3 $\pm$ 2.7 <sup>a</sup>        | 166.0 $\pm$ 10.6 <sup>a</sup>       | 217.4 $\pm$ 13.1 <sup>a</sup>                              | 7.1 $\pm$ 0.2 <sup>a</sup>        |

13

14 **Figure legends**

15 **Figure 1.** Venn diagram of differentially expressed genes (FDR<0.05) in *Arundo donax*  
16 plants without phosphorous supply (-P), with excess supply of phosphorous (+P) or  
17 sodium chloride (+Na), and with an excess supply of both phosphorous and sodium  
18 chloride (+NaP) with respect to control condition.

19 **Figure 2.** Volcano plots showing the entity of differentially expressed genes (DEGs) in  
20 *Arundo donax* plants without phosphorous supply (a: -P), with excess supply of  
21 phosphorous (b: +P) or sodium chloride (c: +Na), and with an excess supply of both  
22 phosphorous and sodium chloride (d: +NaP) with respect to control conditions. The log<sub>2</sub>-  
23 fold change (logFC) for each gene is plotted against log<sub>10</sub>-fold Fold Discovery Rate  
24 (logFDR). Significantly DEGs at 5% FDR are highlighted in grey.

25 **Figure 3** – Hydrogen peroxide (H<sub>2</sub>O<sub>2</sub>) (A), glutathione (GSH) (B), abscisic acid (ABA) (C),  
26 caffeic acid derivative (D), zeaxanthin (E) and β-carotene (F) contents of *A. donax* plants  
27 in control (C) conditions, without phosphorous supply (-P), with excess supply of  
28 phosphorous (+P) or of sodium chloride (+Na), and with an excess supply of both  
29 phosphorous and sodium chloride (+NaP). Data are means of 4 plants per treatment ± SE;  
30 different letters indicate statistical difference at P < 0.05.

31 **Figure 4.** Micrographs of leaf ultrastructure of *A. donax* in control conditions with CeCl<sub>3</sub> (A)  
32 and without CeCl<sub>3</sub> (B), with excess supply of phosphorous (C, D) and without phosphorous  
33 (E, F) supply. Legend: CL: chloroplast; CW: cell wall; L: lipid body; M: mitochondrion; N:  
34 nucleus; PE: peroxisome; PL: plastoglobule; SG: starch grain; V: vacuole. Black arrows  
35 refer to electron-dense deposits of CeCl<sub>3</sub>, indicative of the presence of H<sub>2</sub>O<sub>2</sub>. A, B, C, D:  
36 bar 1 μm; E: bar 100 nm; F: bar 2 μm.

37 **Figure 5.** Micrographs of leaf ultrastructure of *A. donax* with excess supply of sodium  
38 chloride (A, B, C), with both excess supply of phosphorous and sodium chloride (D, E, F).  
39 Legend: CL: chloroplast; CW: cell wall; L: lipid body; M: mitochondrion; N: nucleus; PE:  
40 peroxisome; PL: plastoglobule; SG: starch grain; V: vacuole. White arrows refer to wavy  
41 structure; black arrows refer to electron-dense deposits of CeCl<sub>3</sub>, indicative of the  
42 presence of H<sub>2</sub>O<sub>2</sub>. A: bar 5 μm; B, C, D: bar 2 μm; E, F: bar 1 μm.

**NP**

**P**

**158**  
**(1.7%)**

**45**  
**(0.5%)**

**1**  
**(0%)**

**6**  
**(0.1%)**

**23**  
**(0.3%)**

bioRxiv preprint doi: <https://doi.org/10.1101/477810>; this version posted November 26, 2018. The copyright holder for this preprint (which was not certified by peer review) is the author/funder, who has granted bioRxiv a license to display the preprint in perpetuity. It is made available under aCC-BY-NC-ND 4.0 International license.

**261**  
**(2.8%)**

**3**  
**(0%)**

**5**  
**(0.1%)**

**7347**  
**(80%)**

**3**  
**(0%)**

**5**  
**(0.1%)**

**50**  
**(0.5%)**

**23**  
**(0.3%)**

**11**  
**(0.1%)**

**1247**  
**(13.6%)**

**Na**

**NaP**

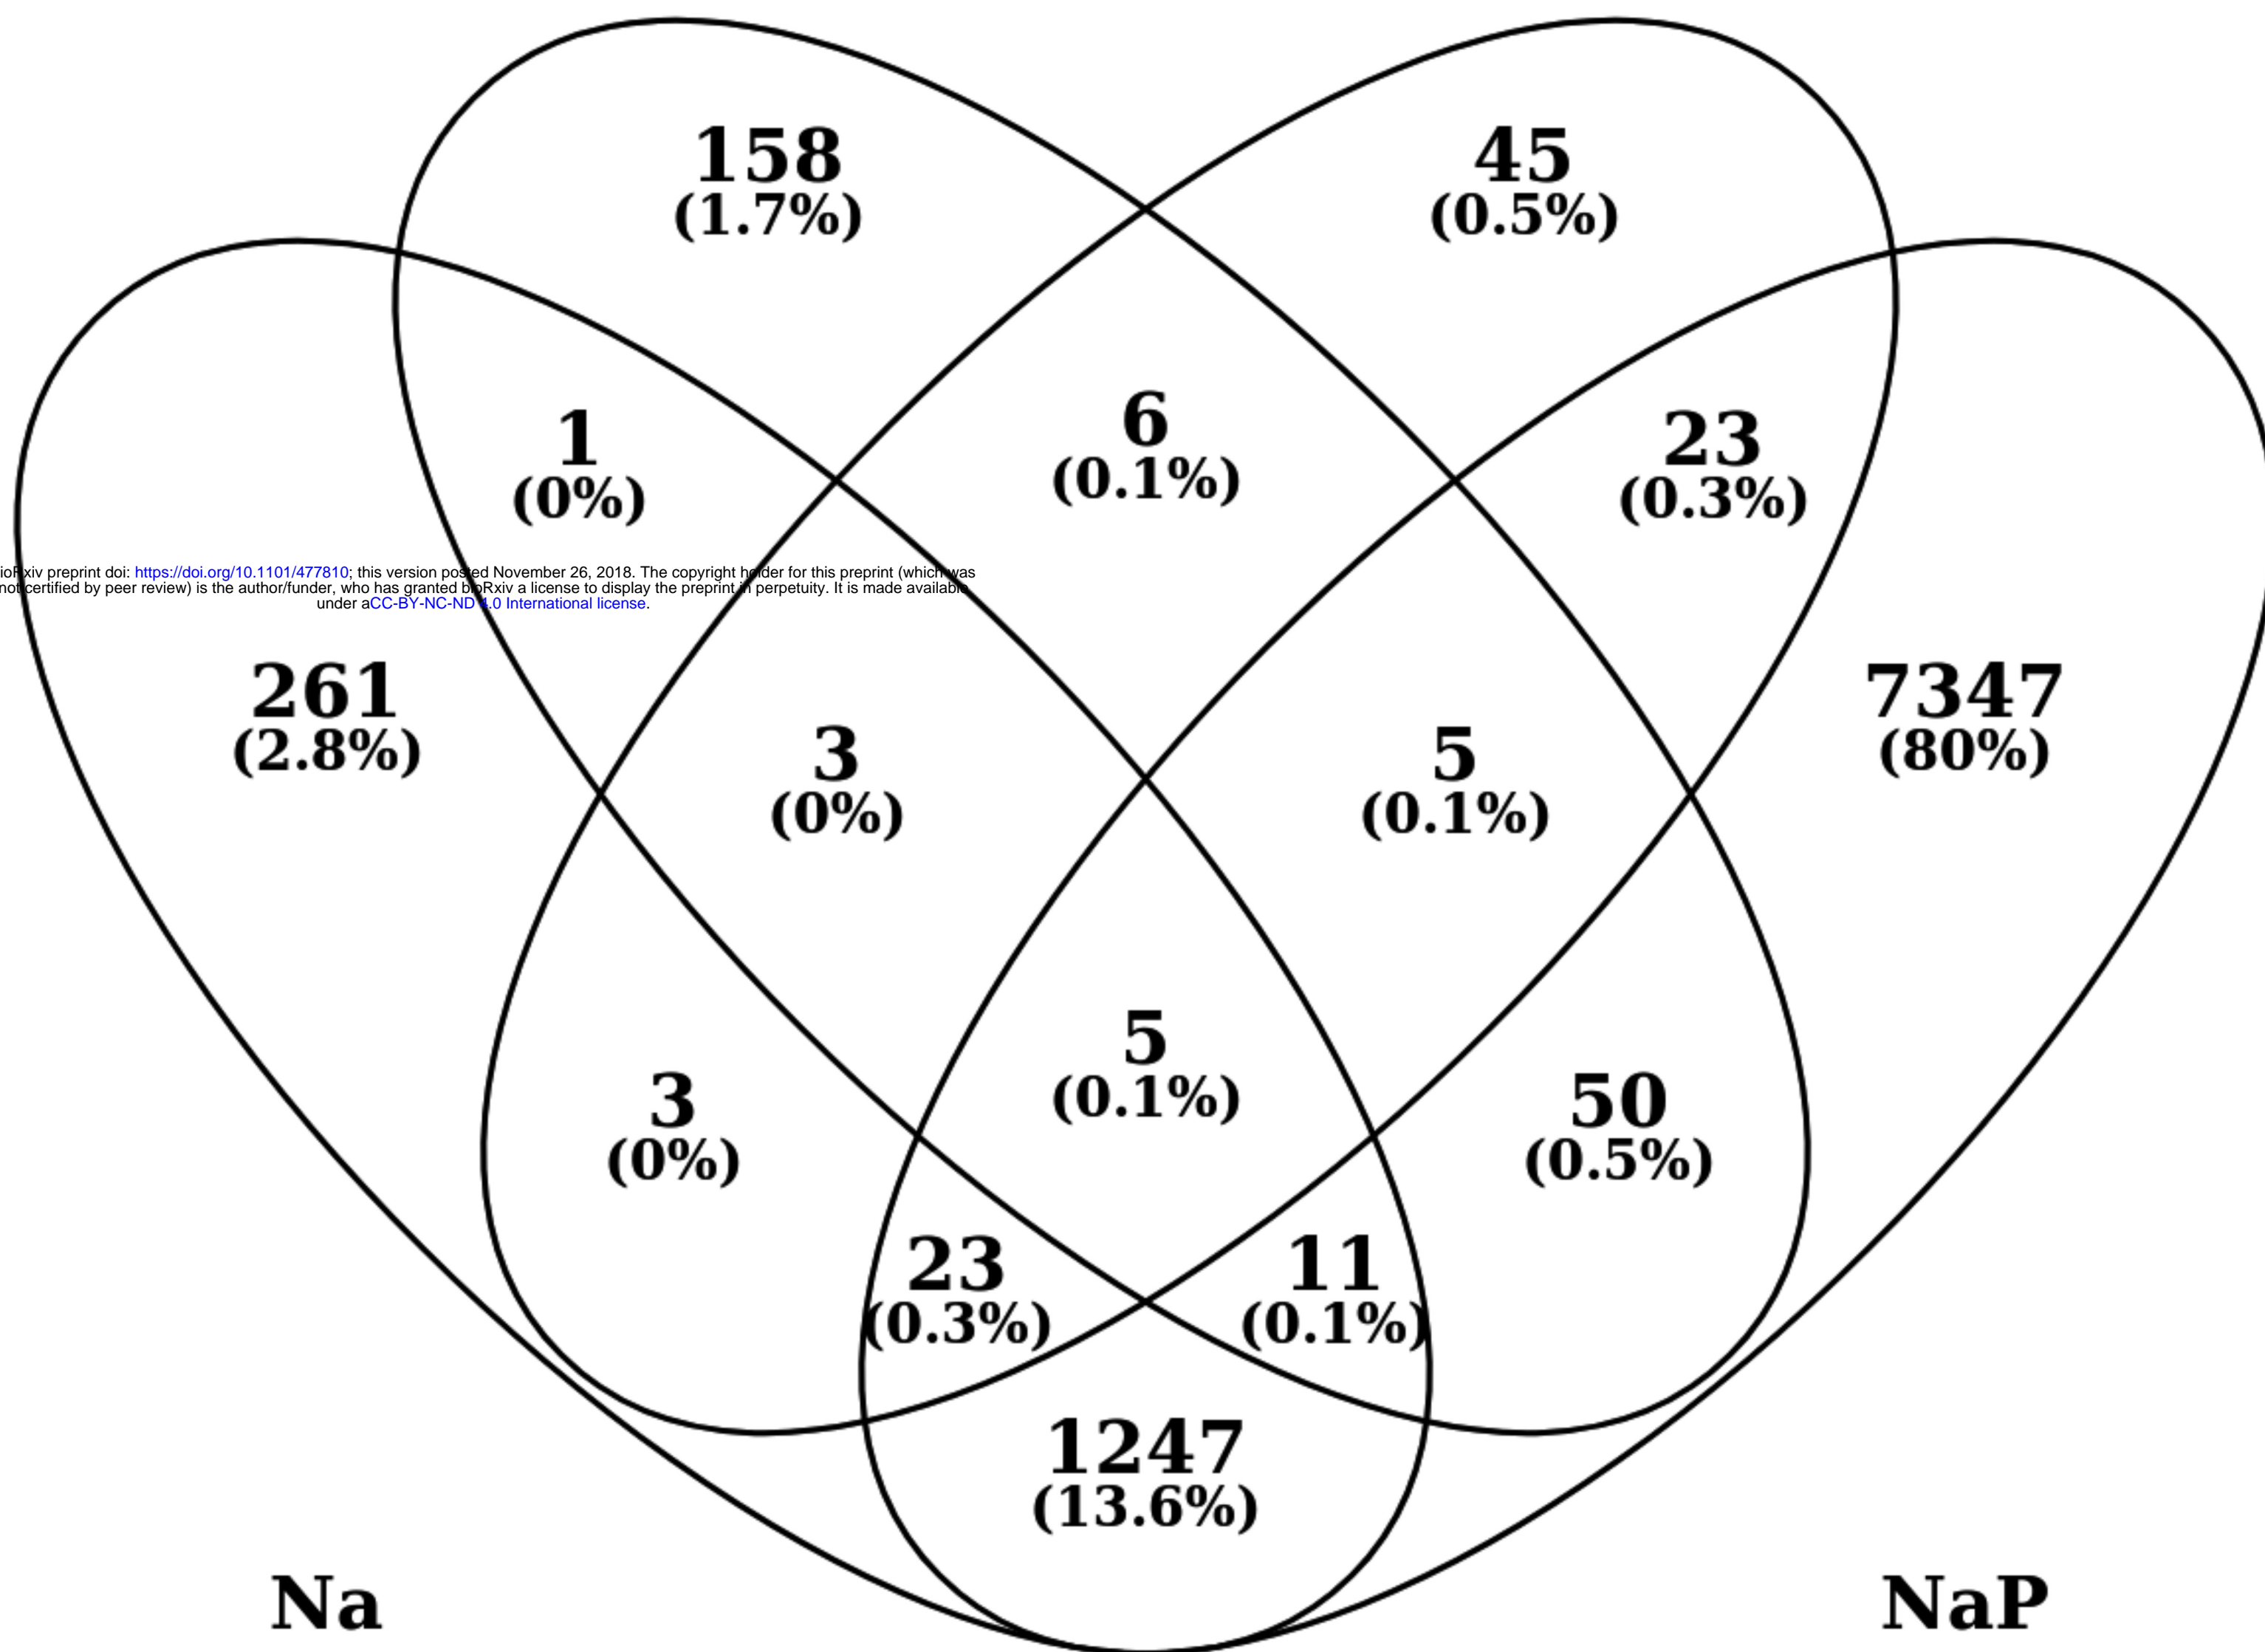

**a)**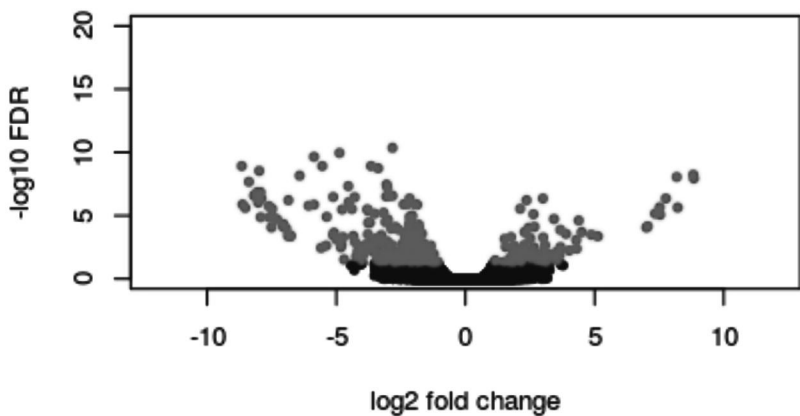**b)**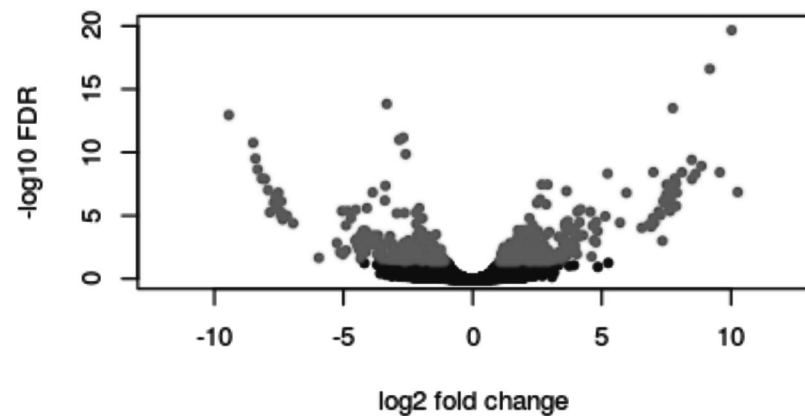**c)**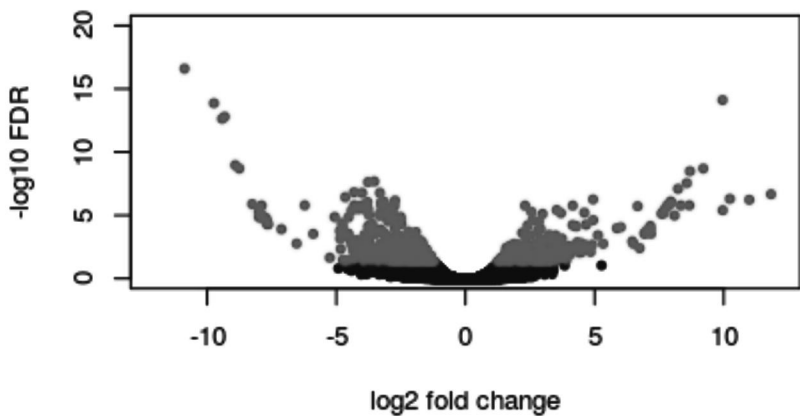**d)**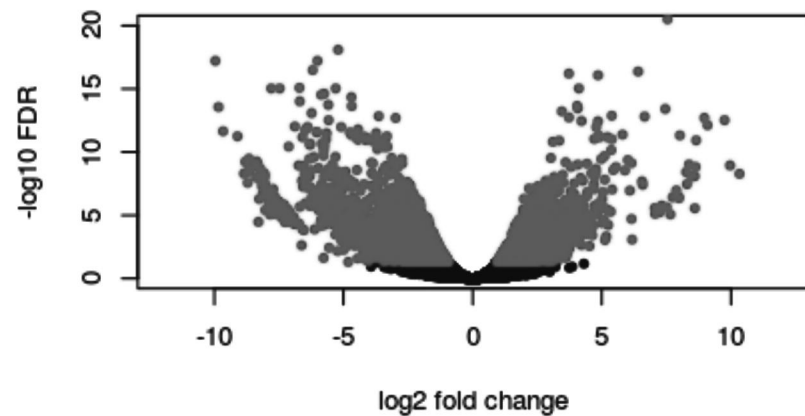

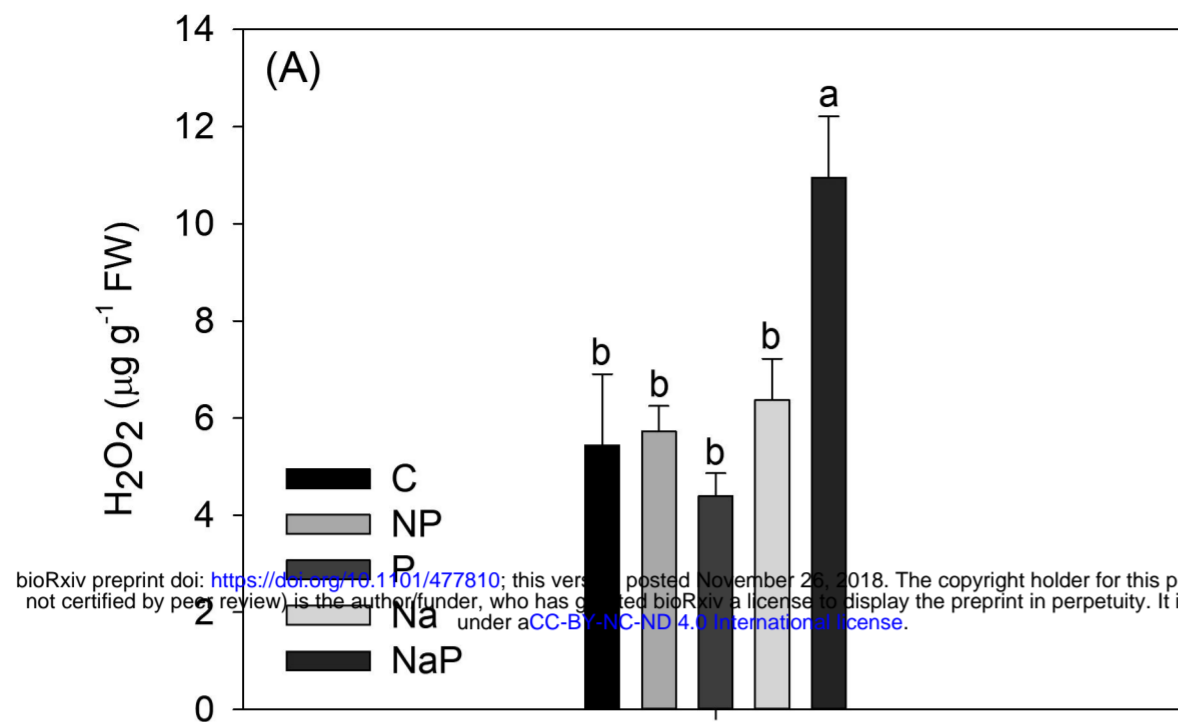

bioRxiv preprint doi: <https://doi.org/10.1101/477810>; this version posted November 26, 2018. The copyright holder for this preprint (which was not certified by peer review) is the author/funder, who has granted bioRxiv a license to display the preprint in perpetuity. It is made available under aCC-BY-NC-ND 4.0 International license.

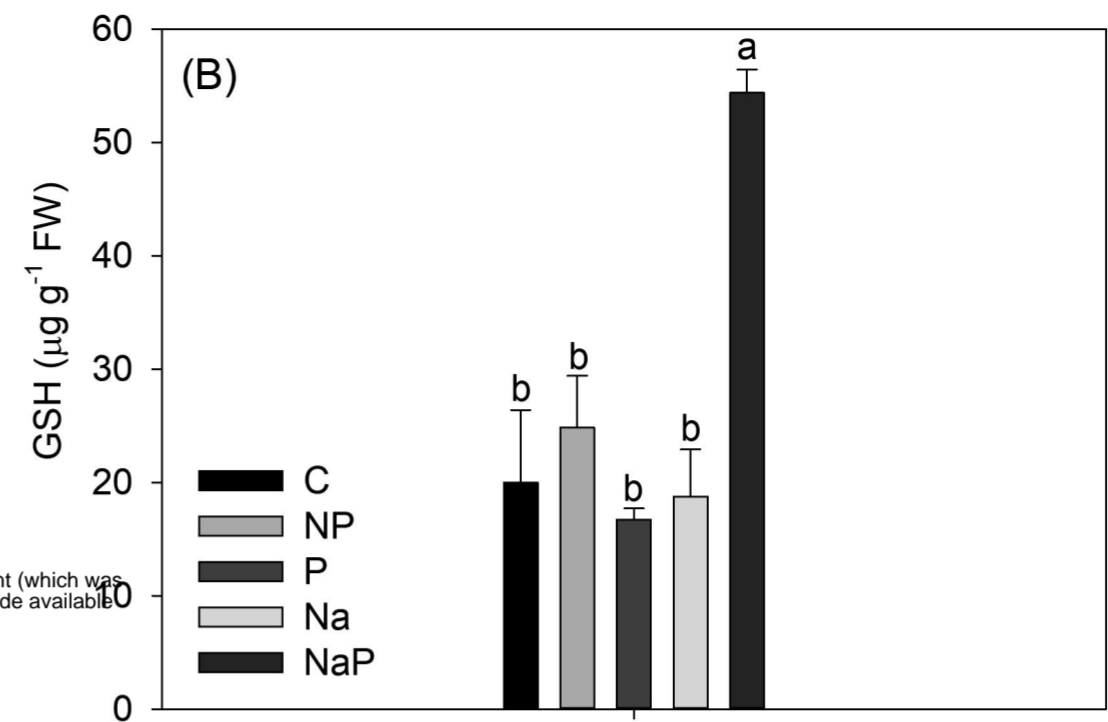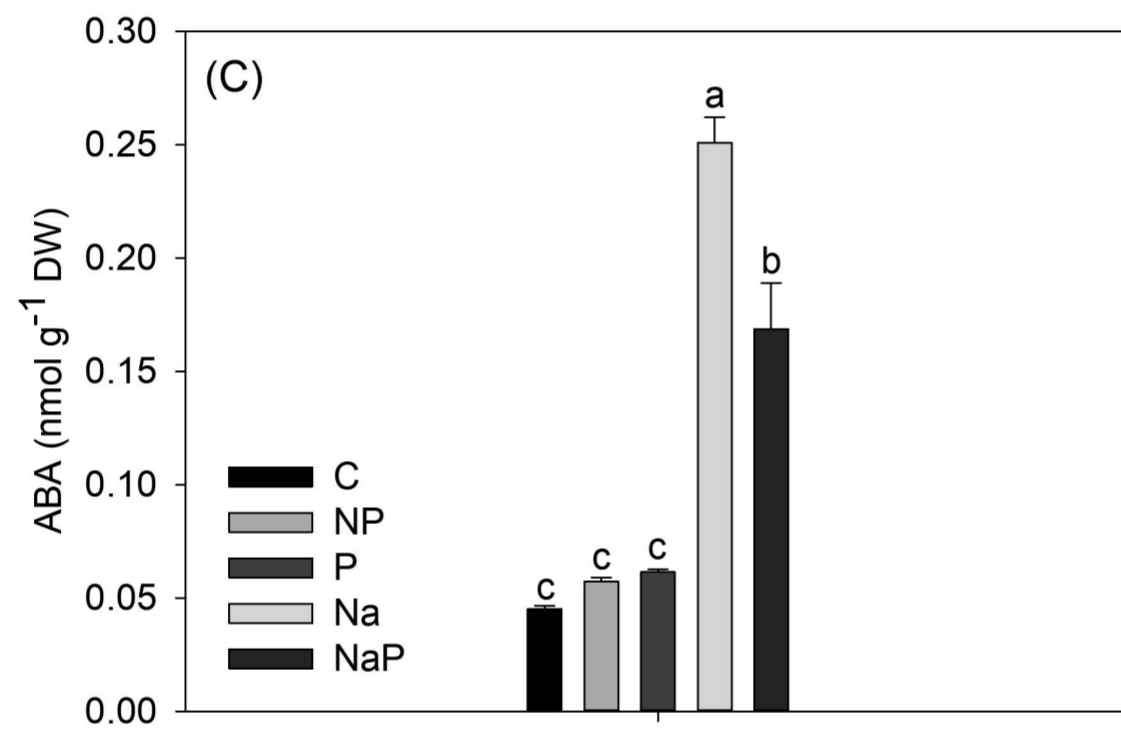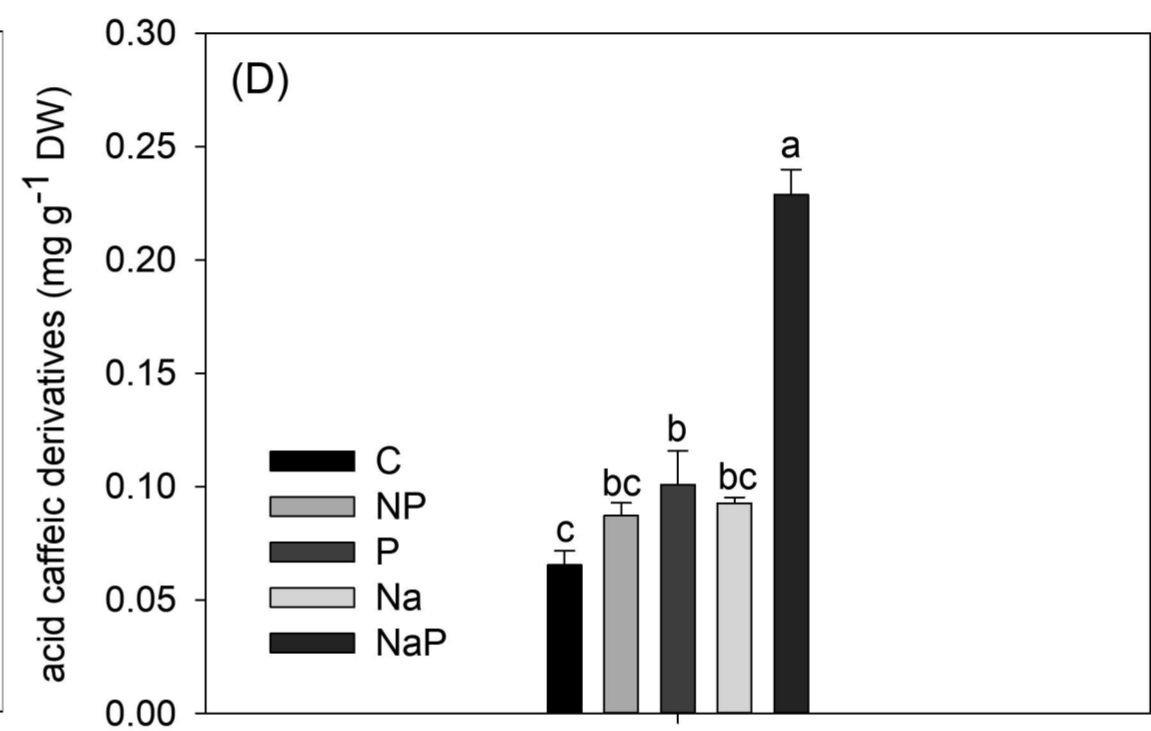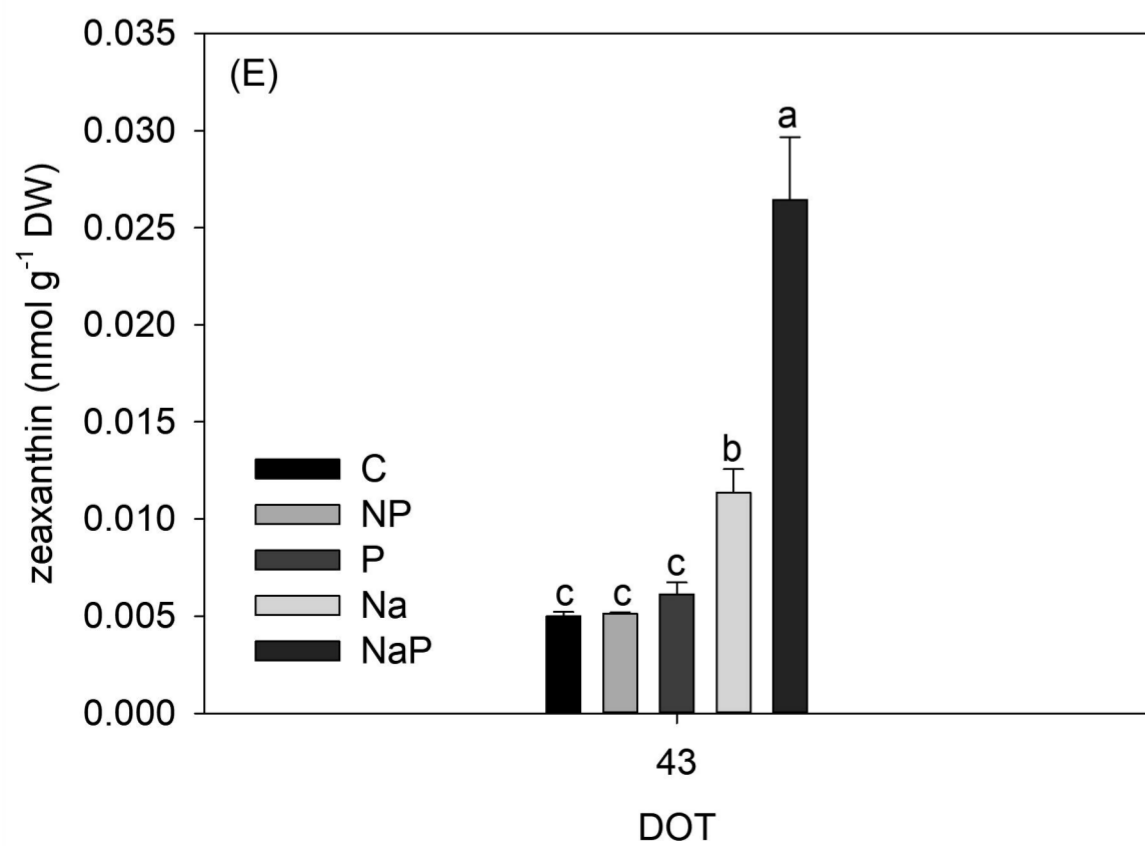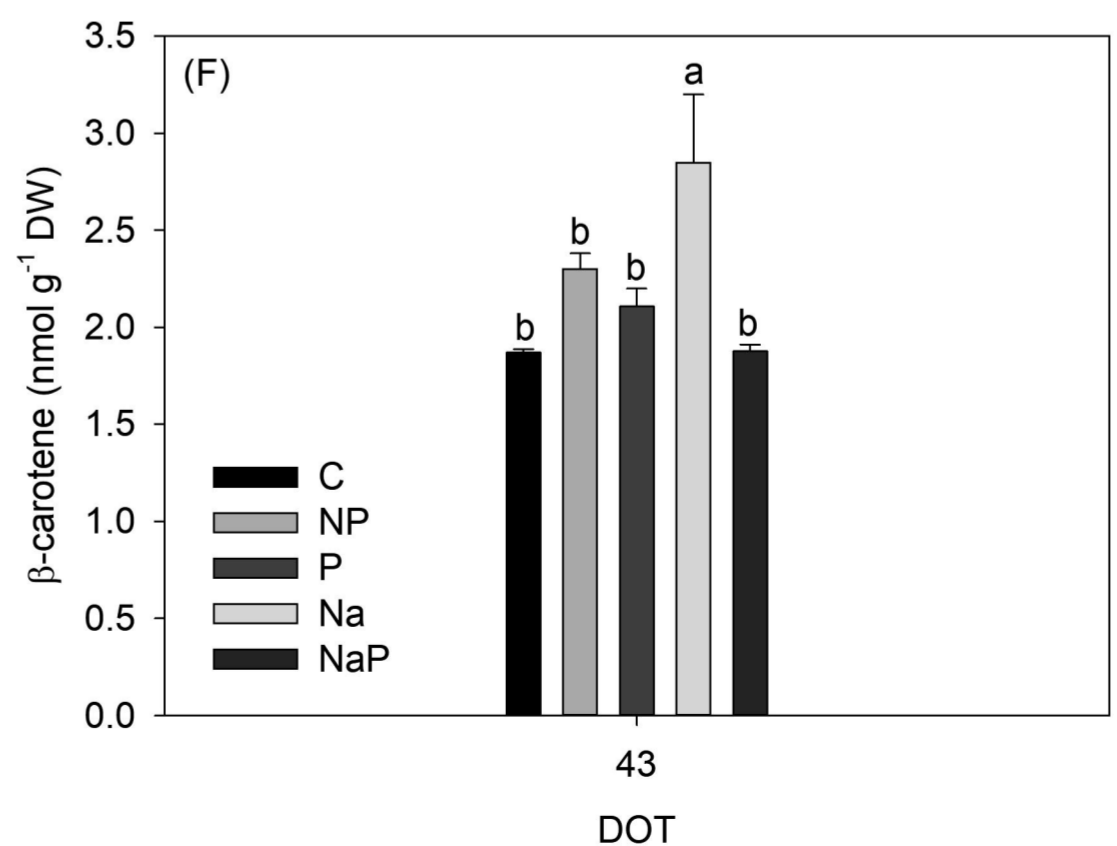

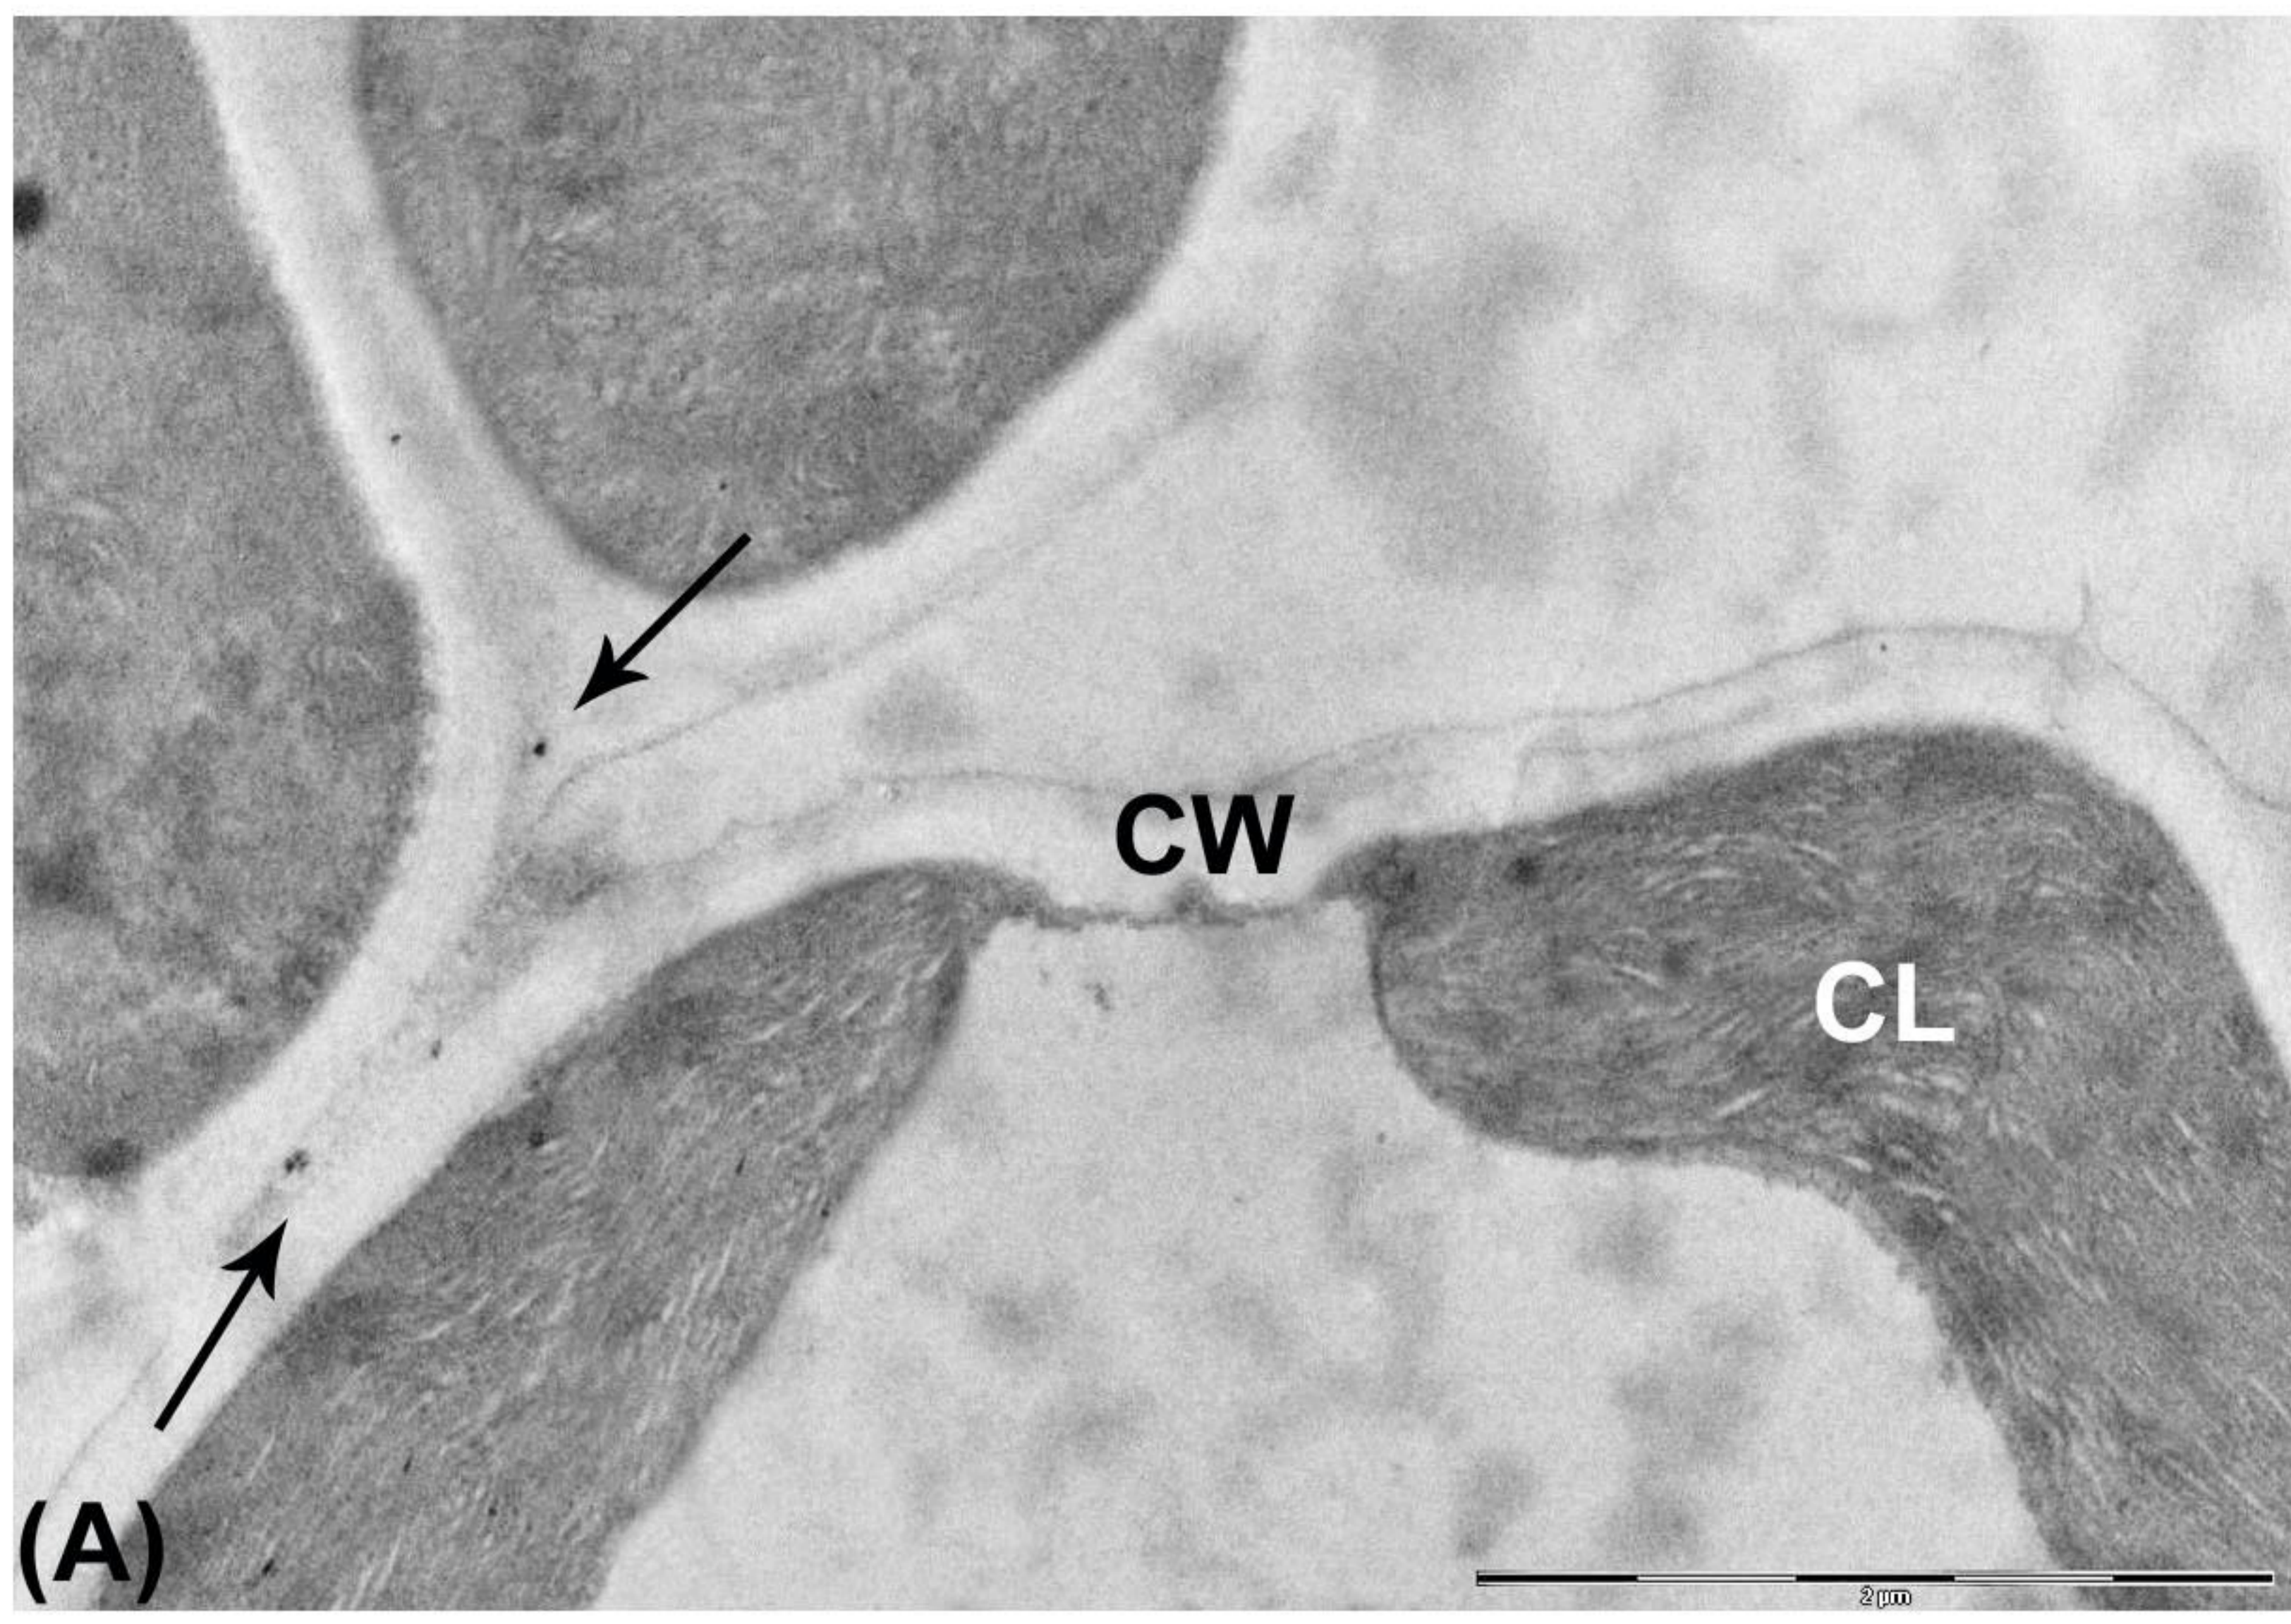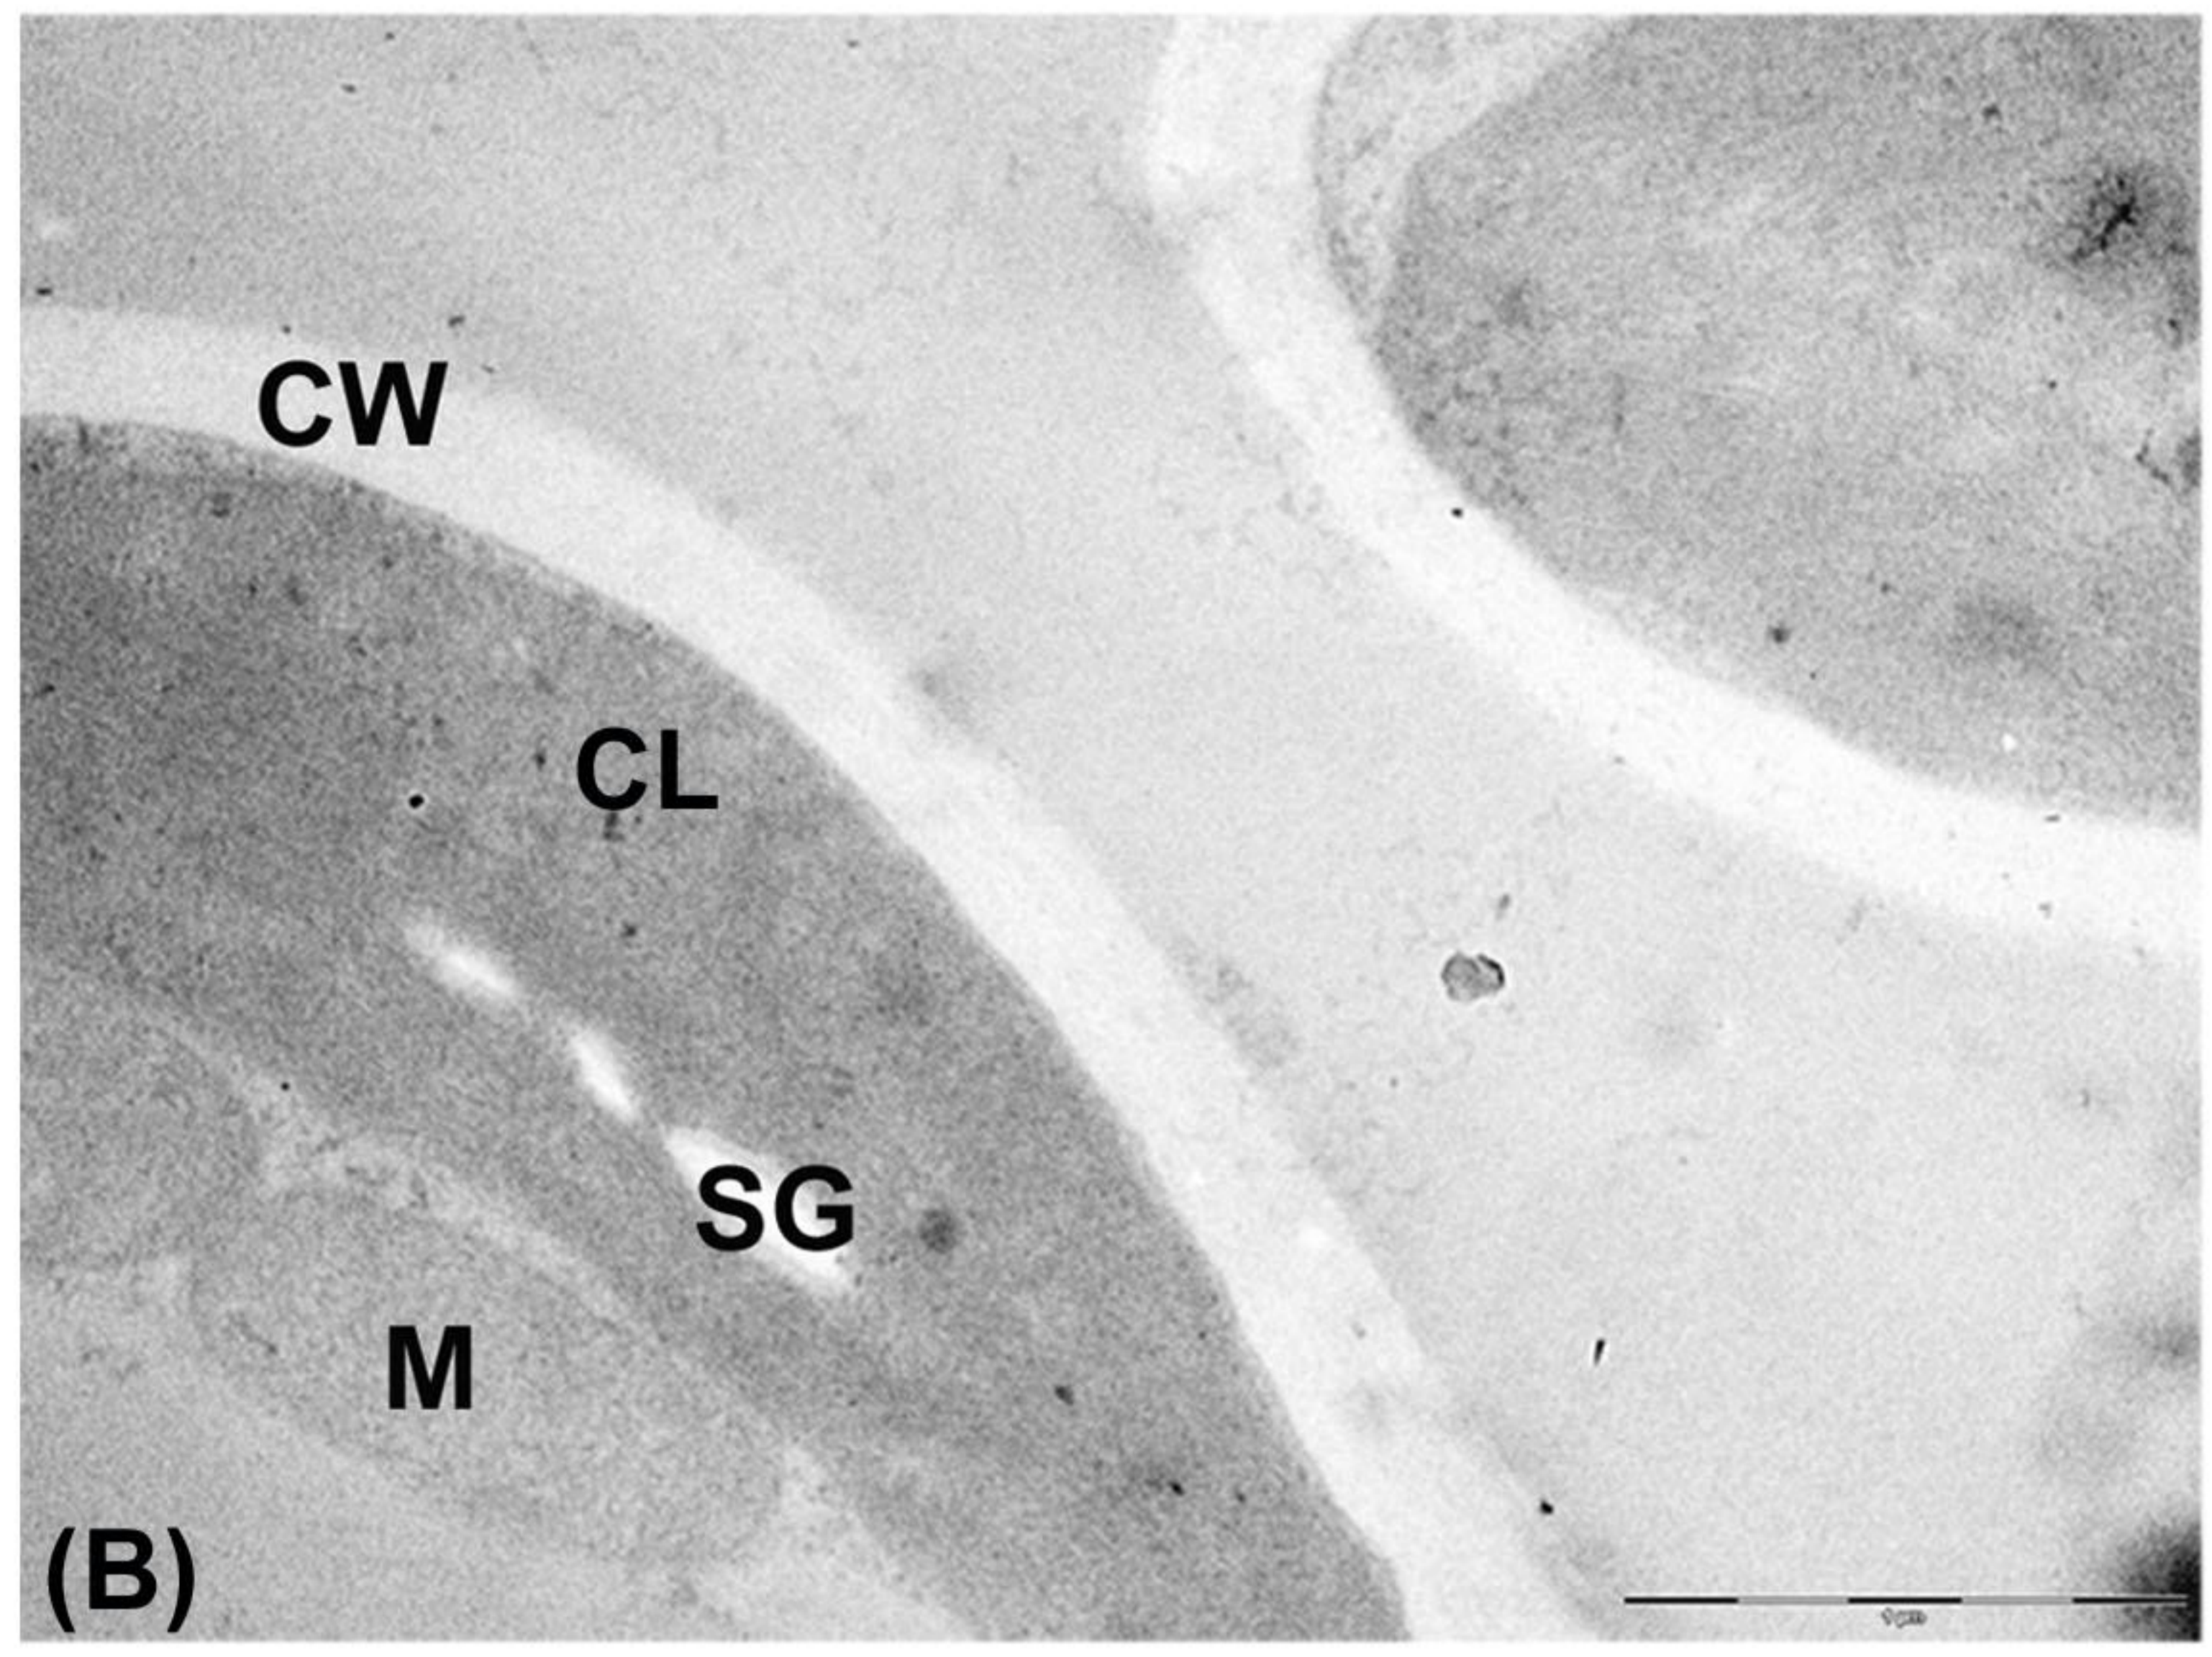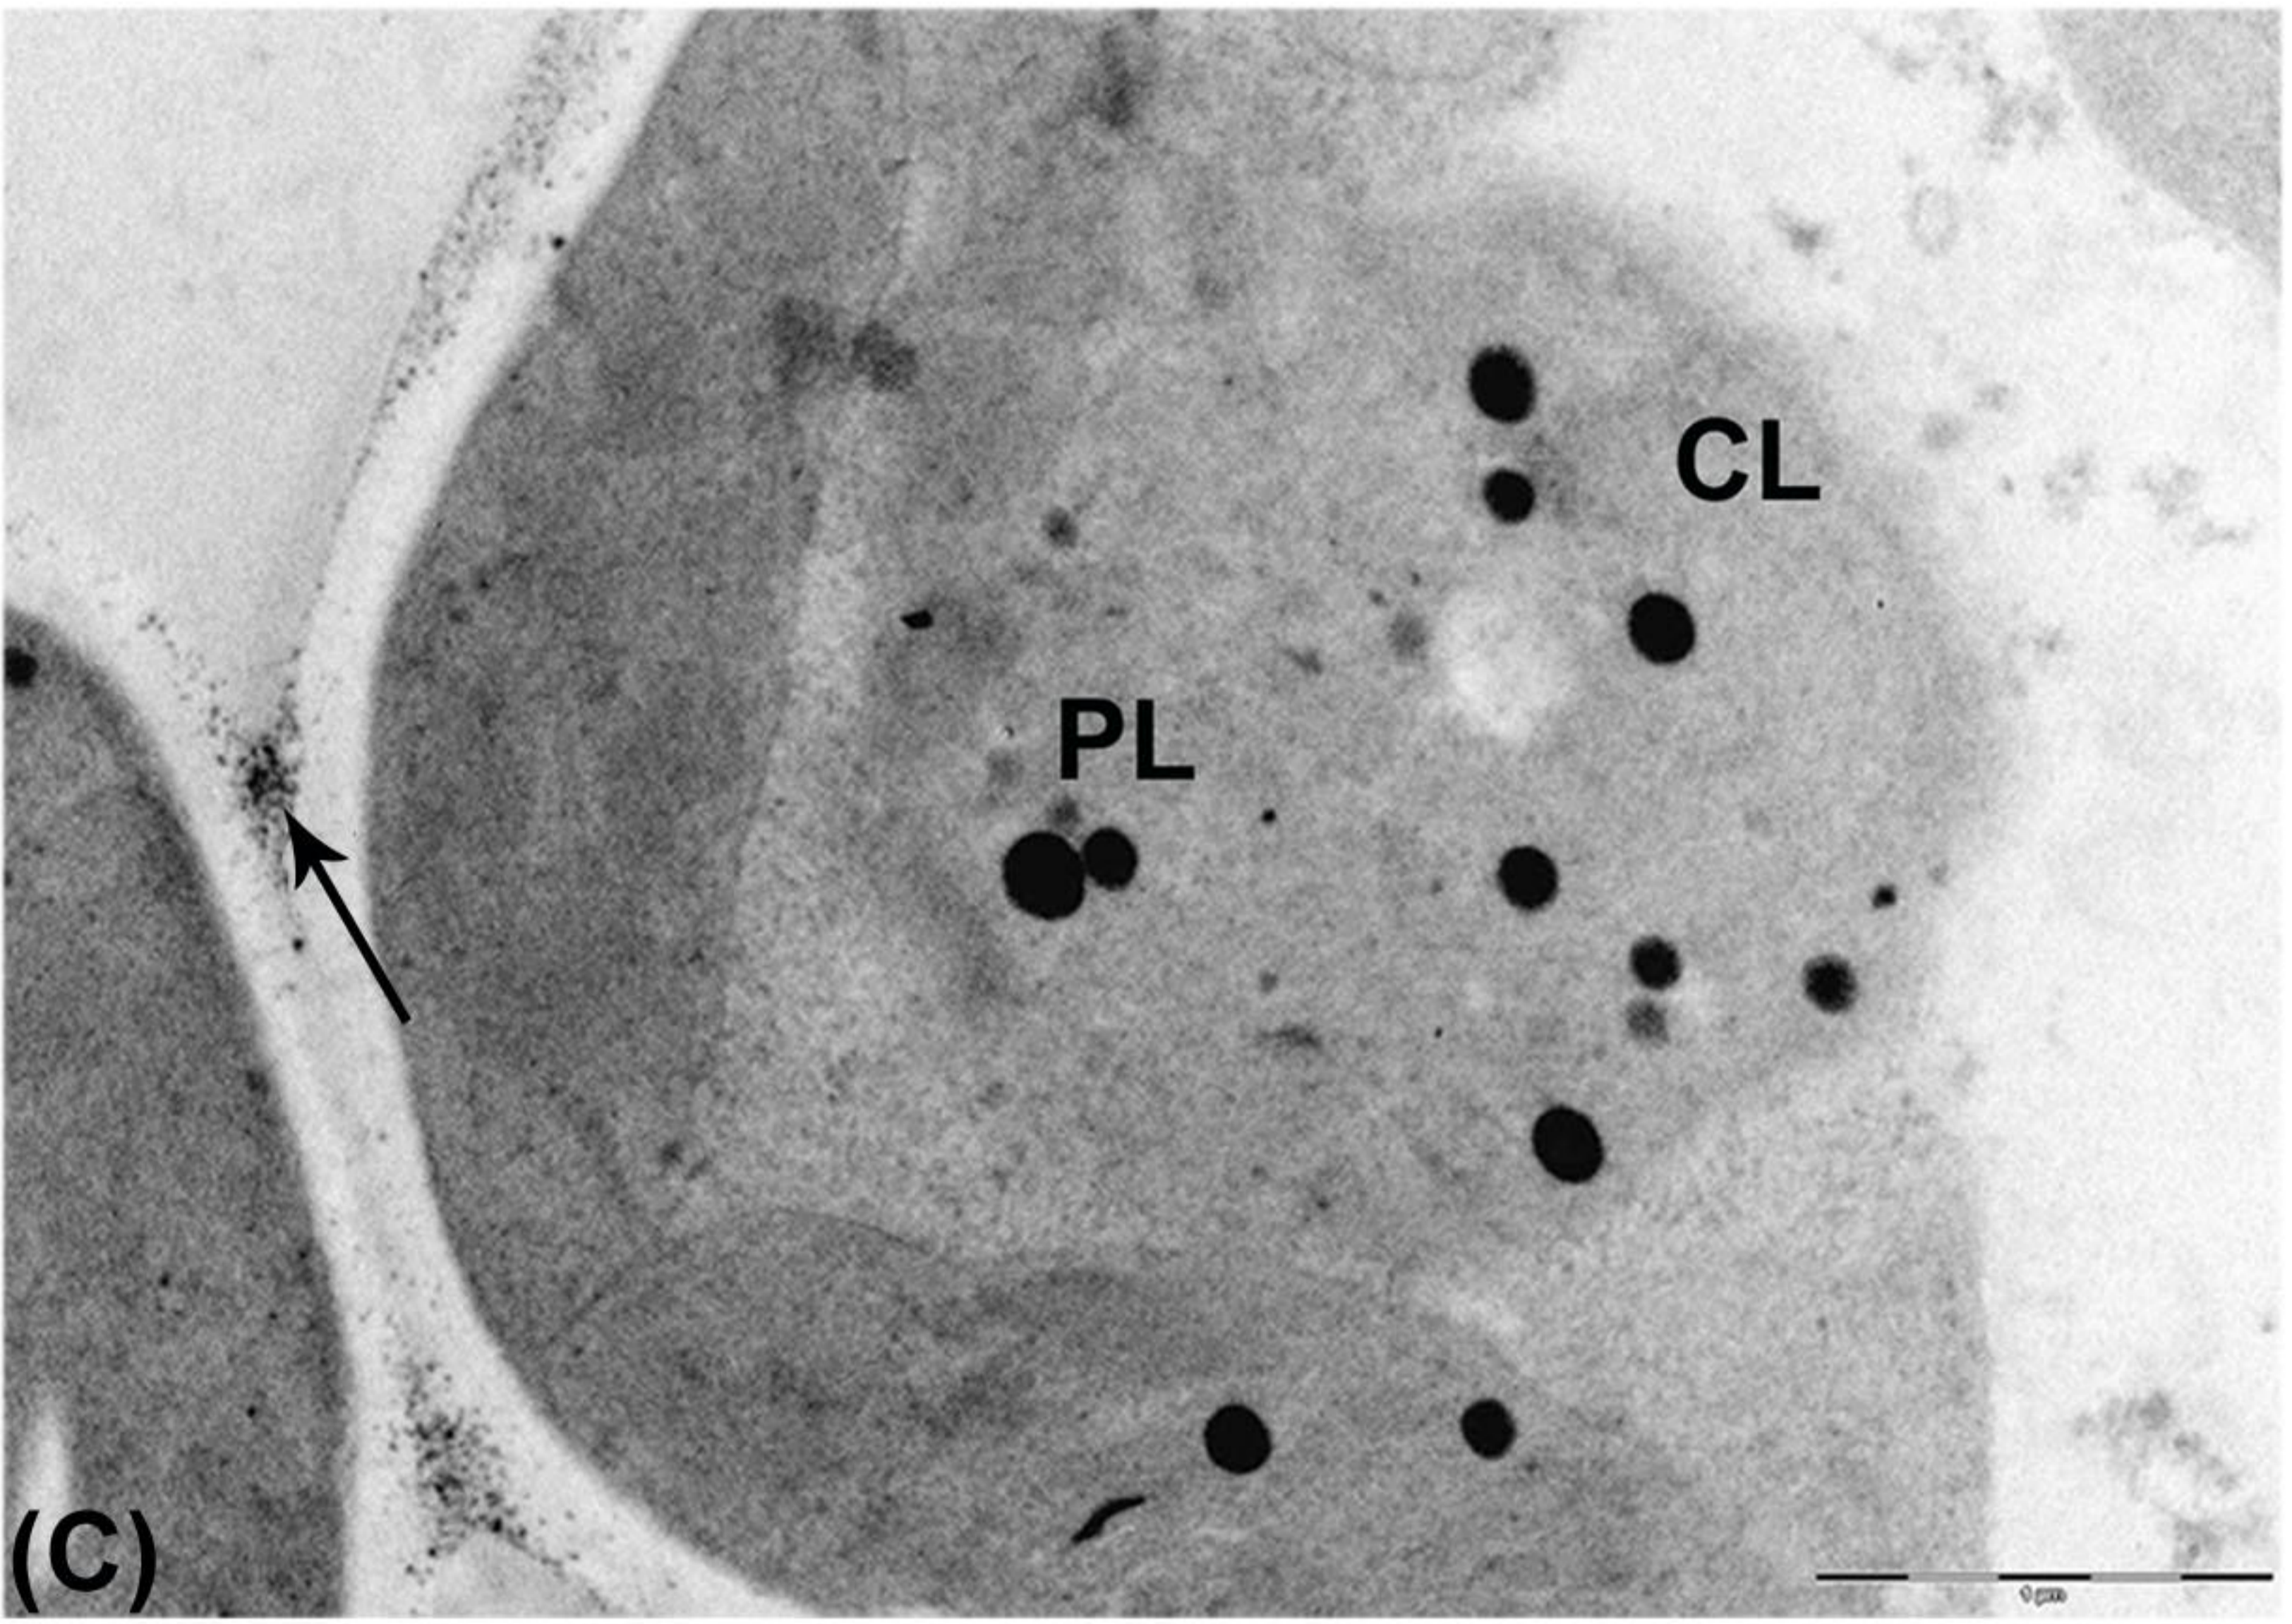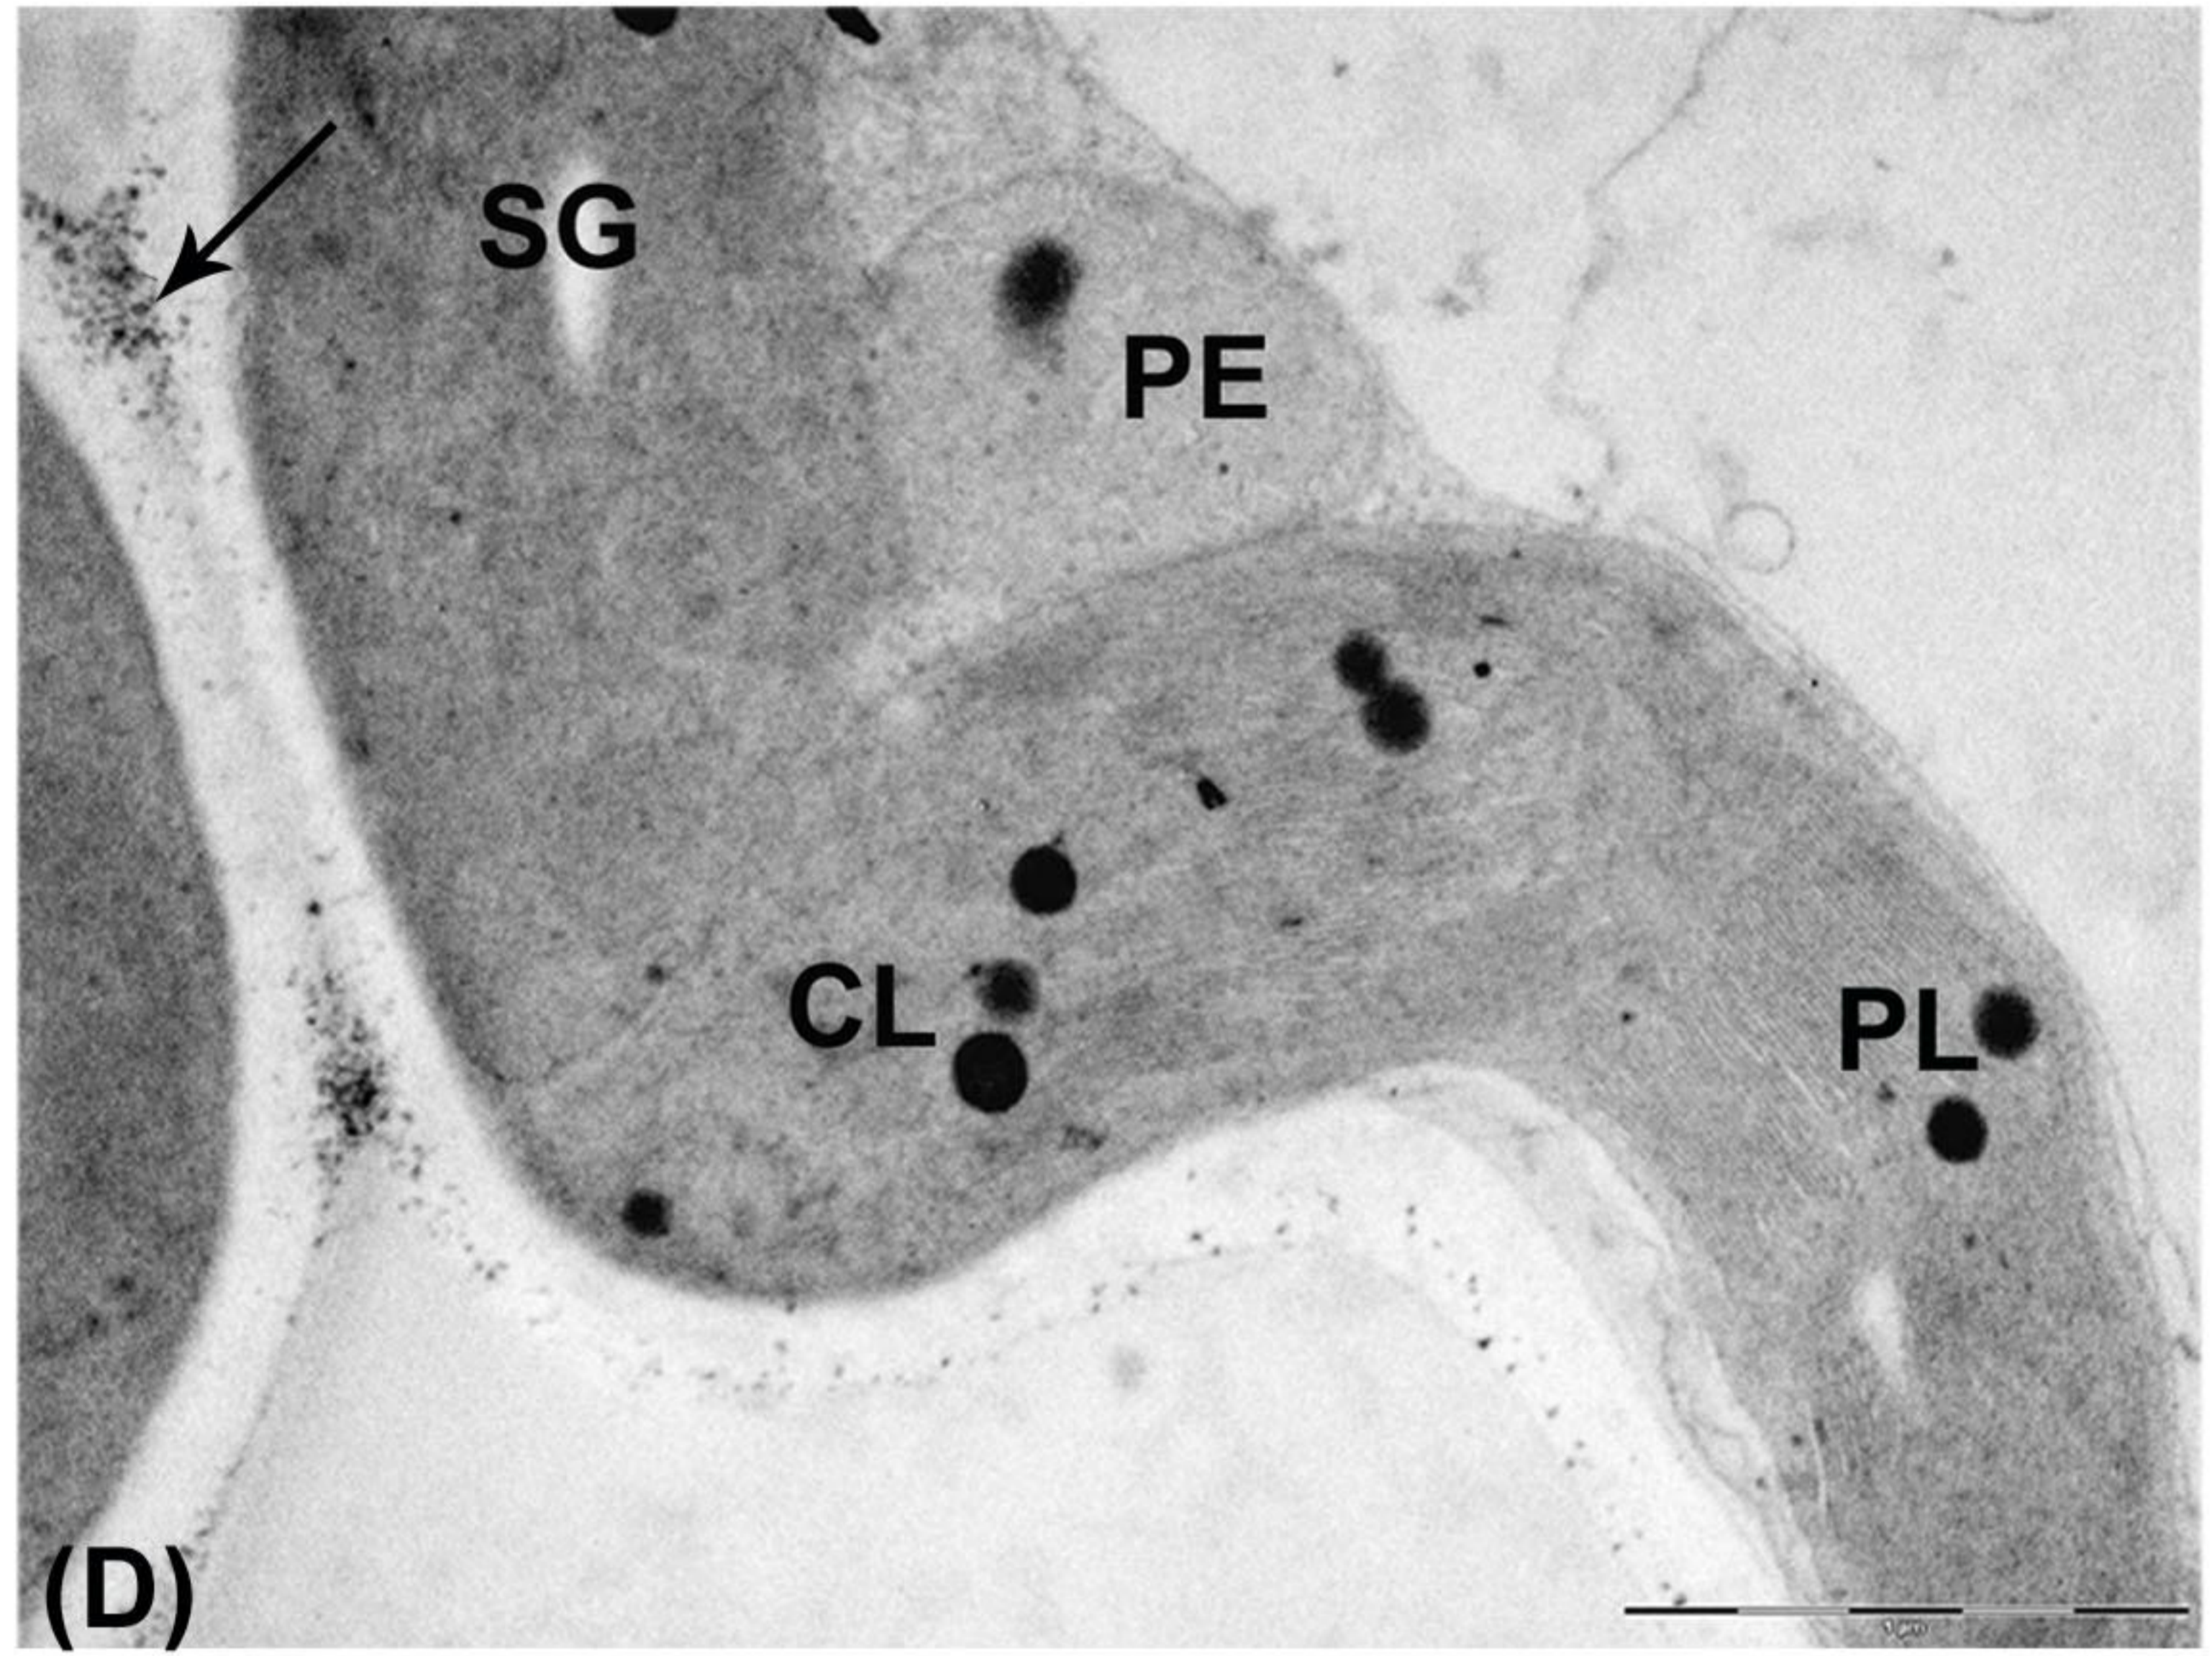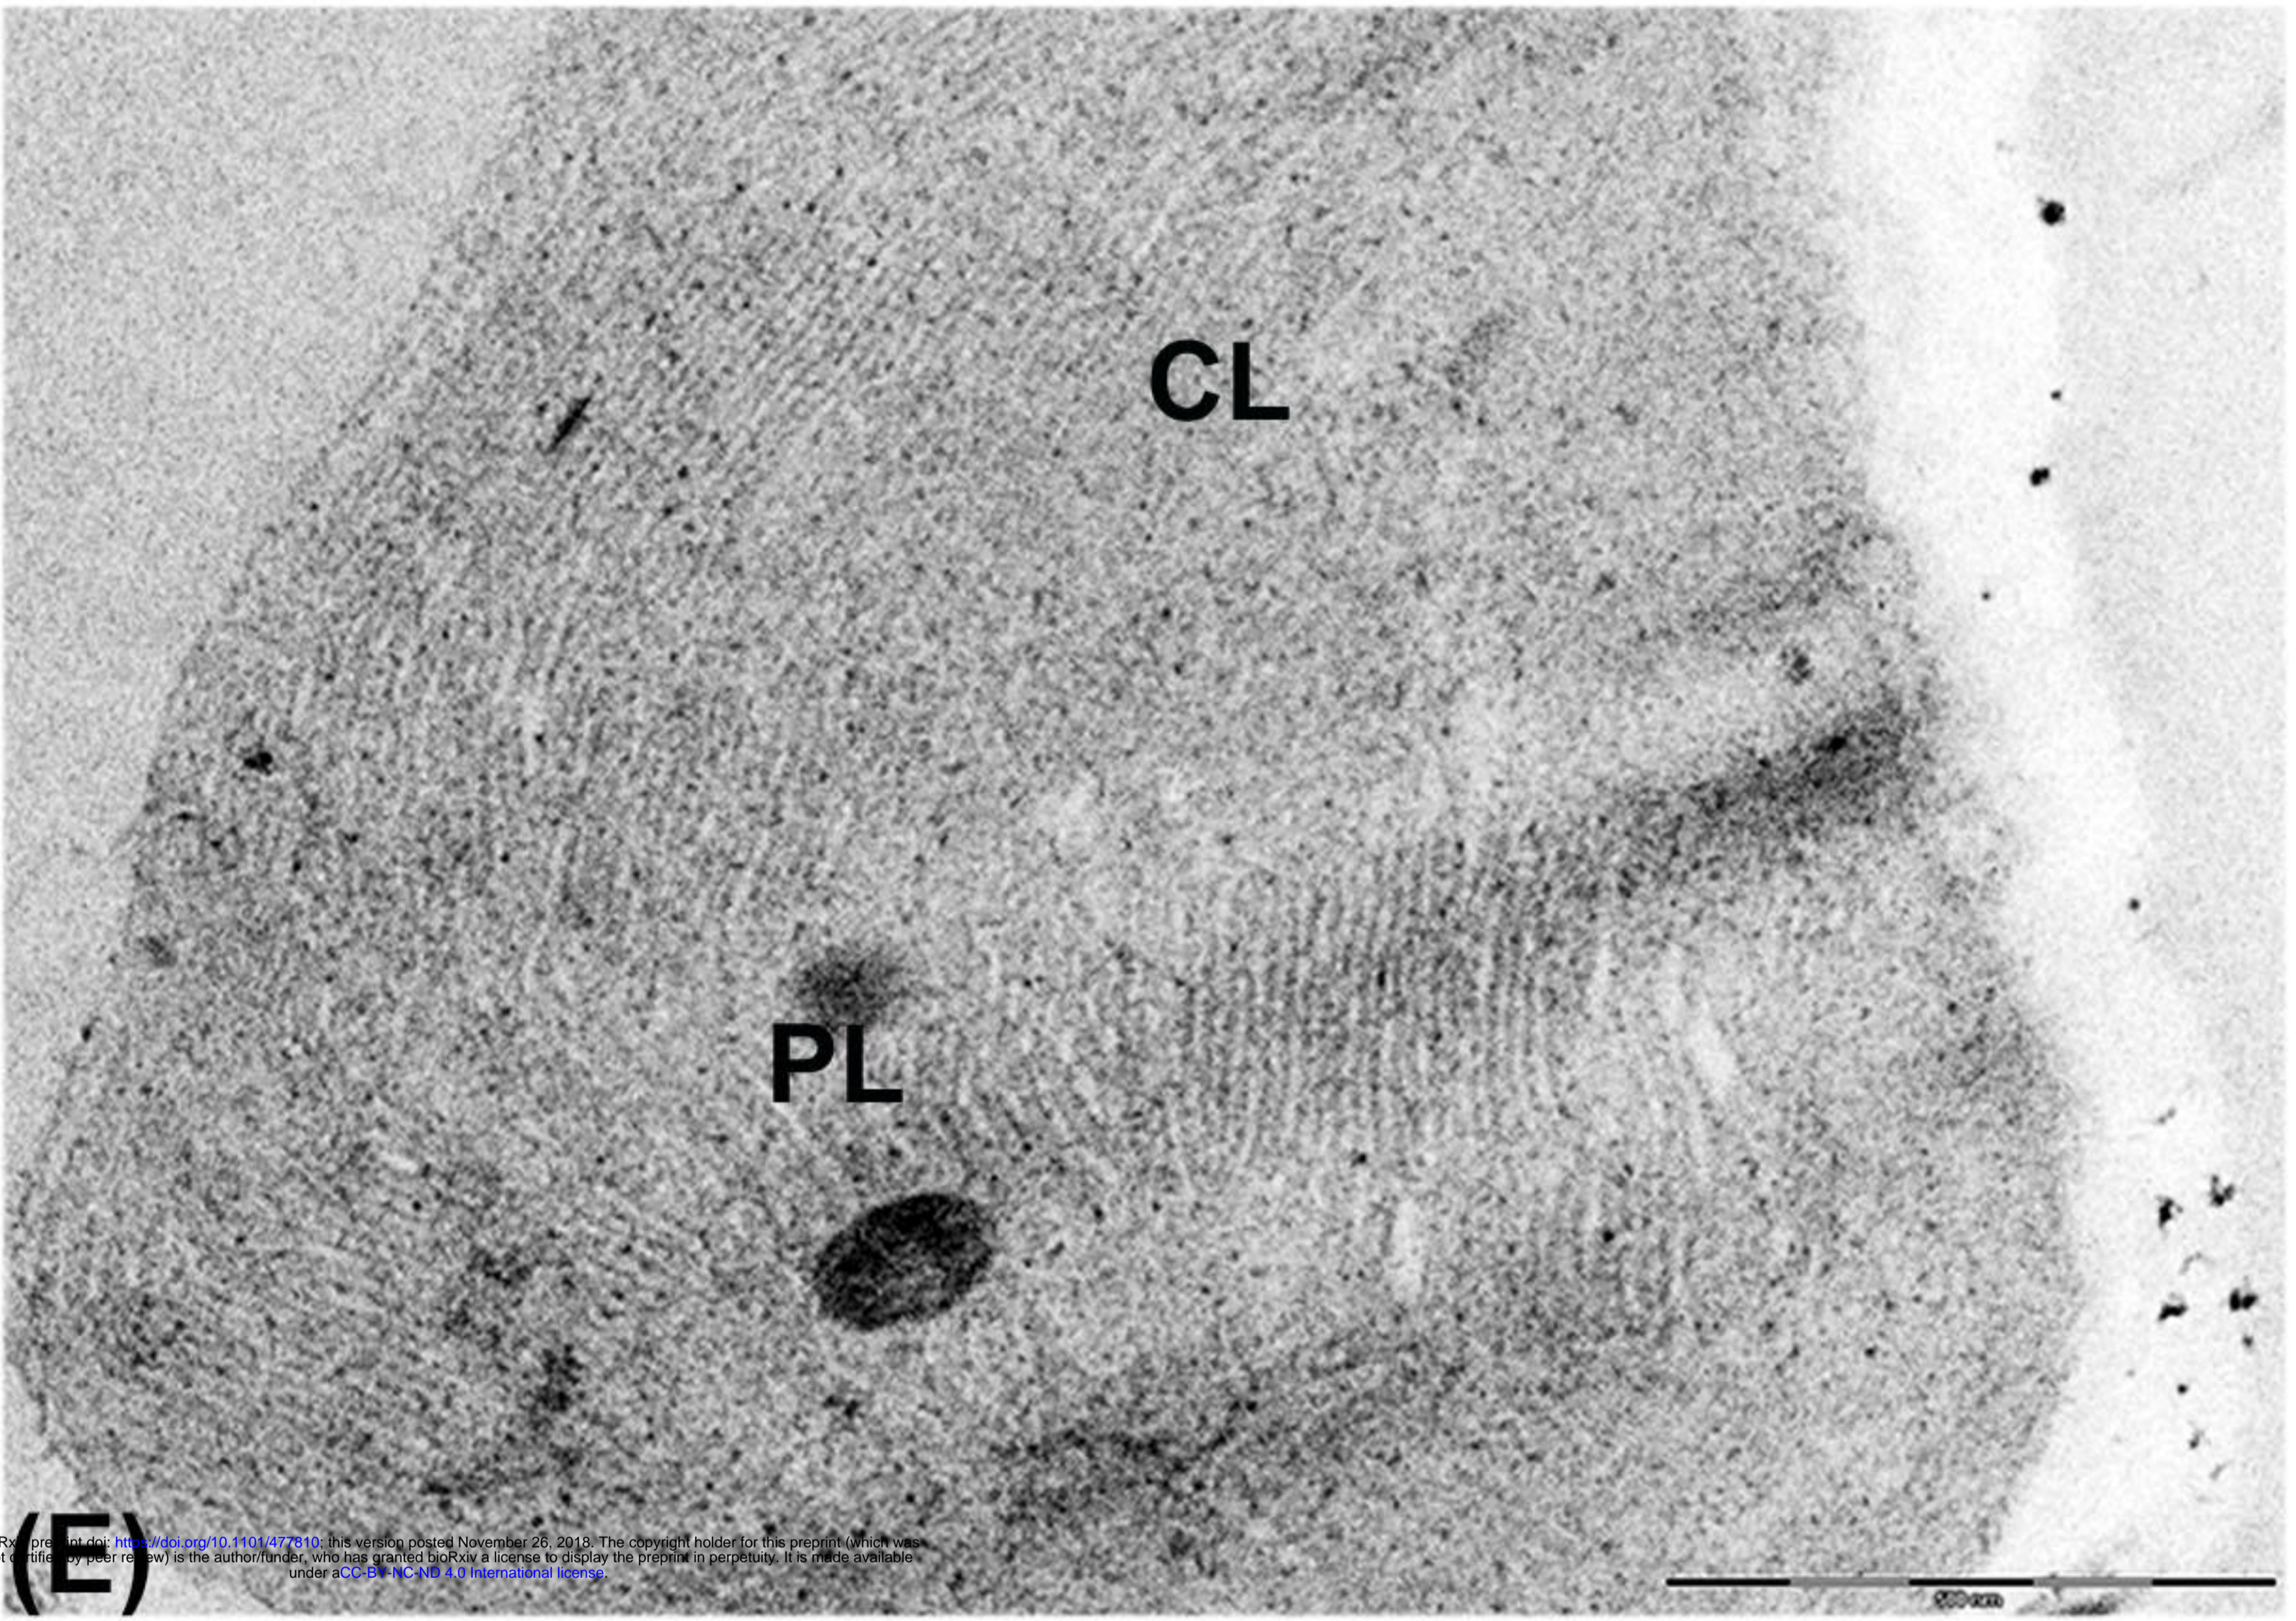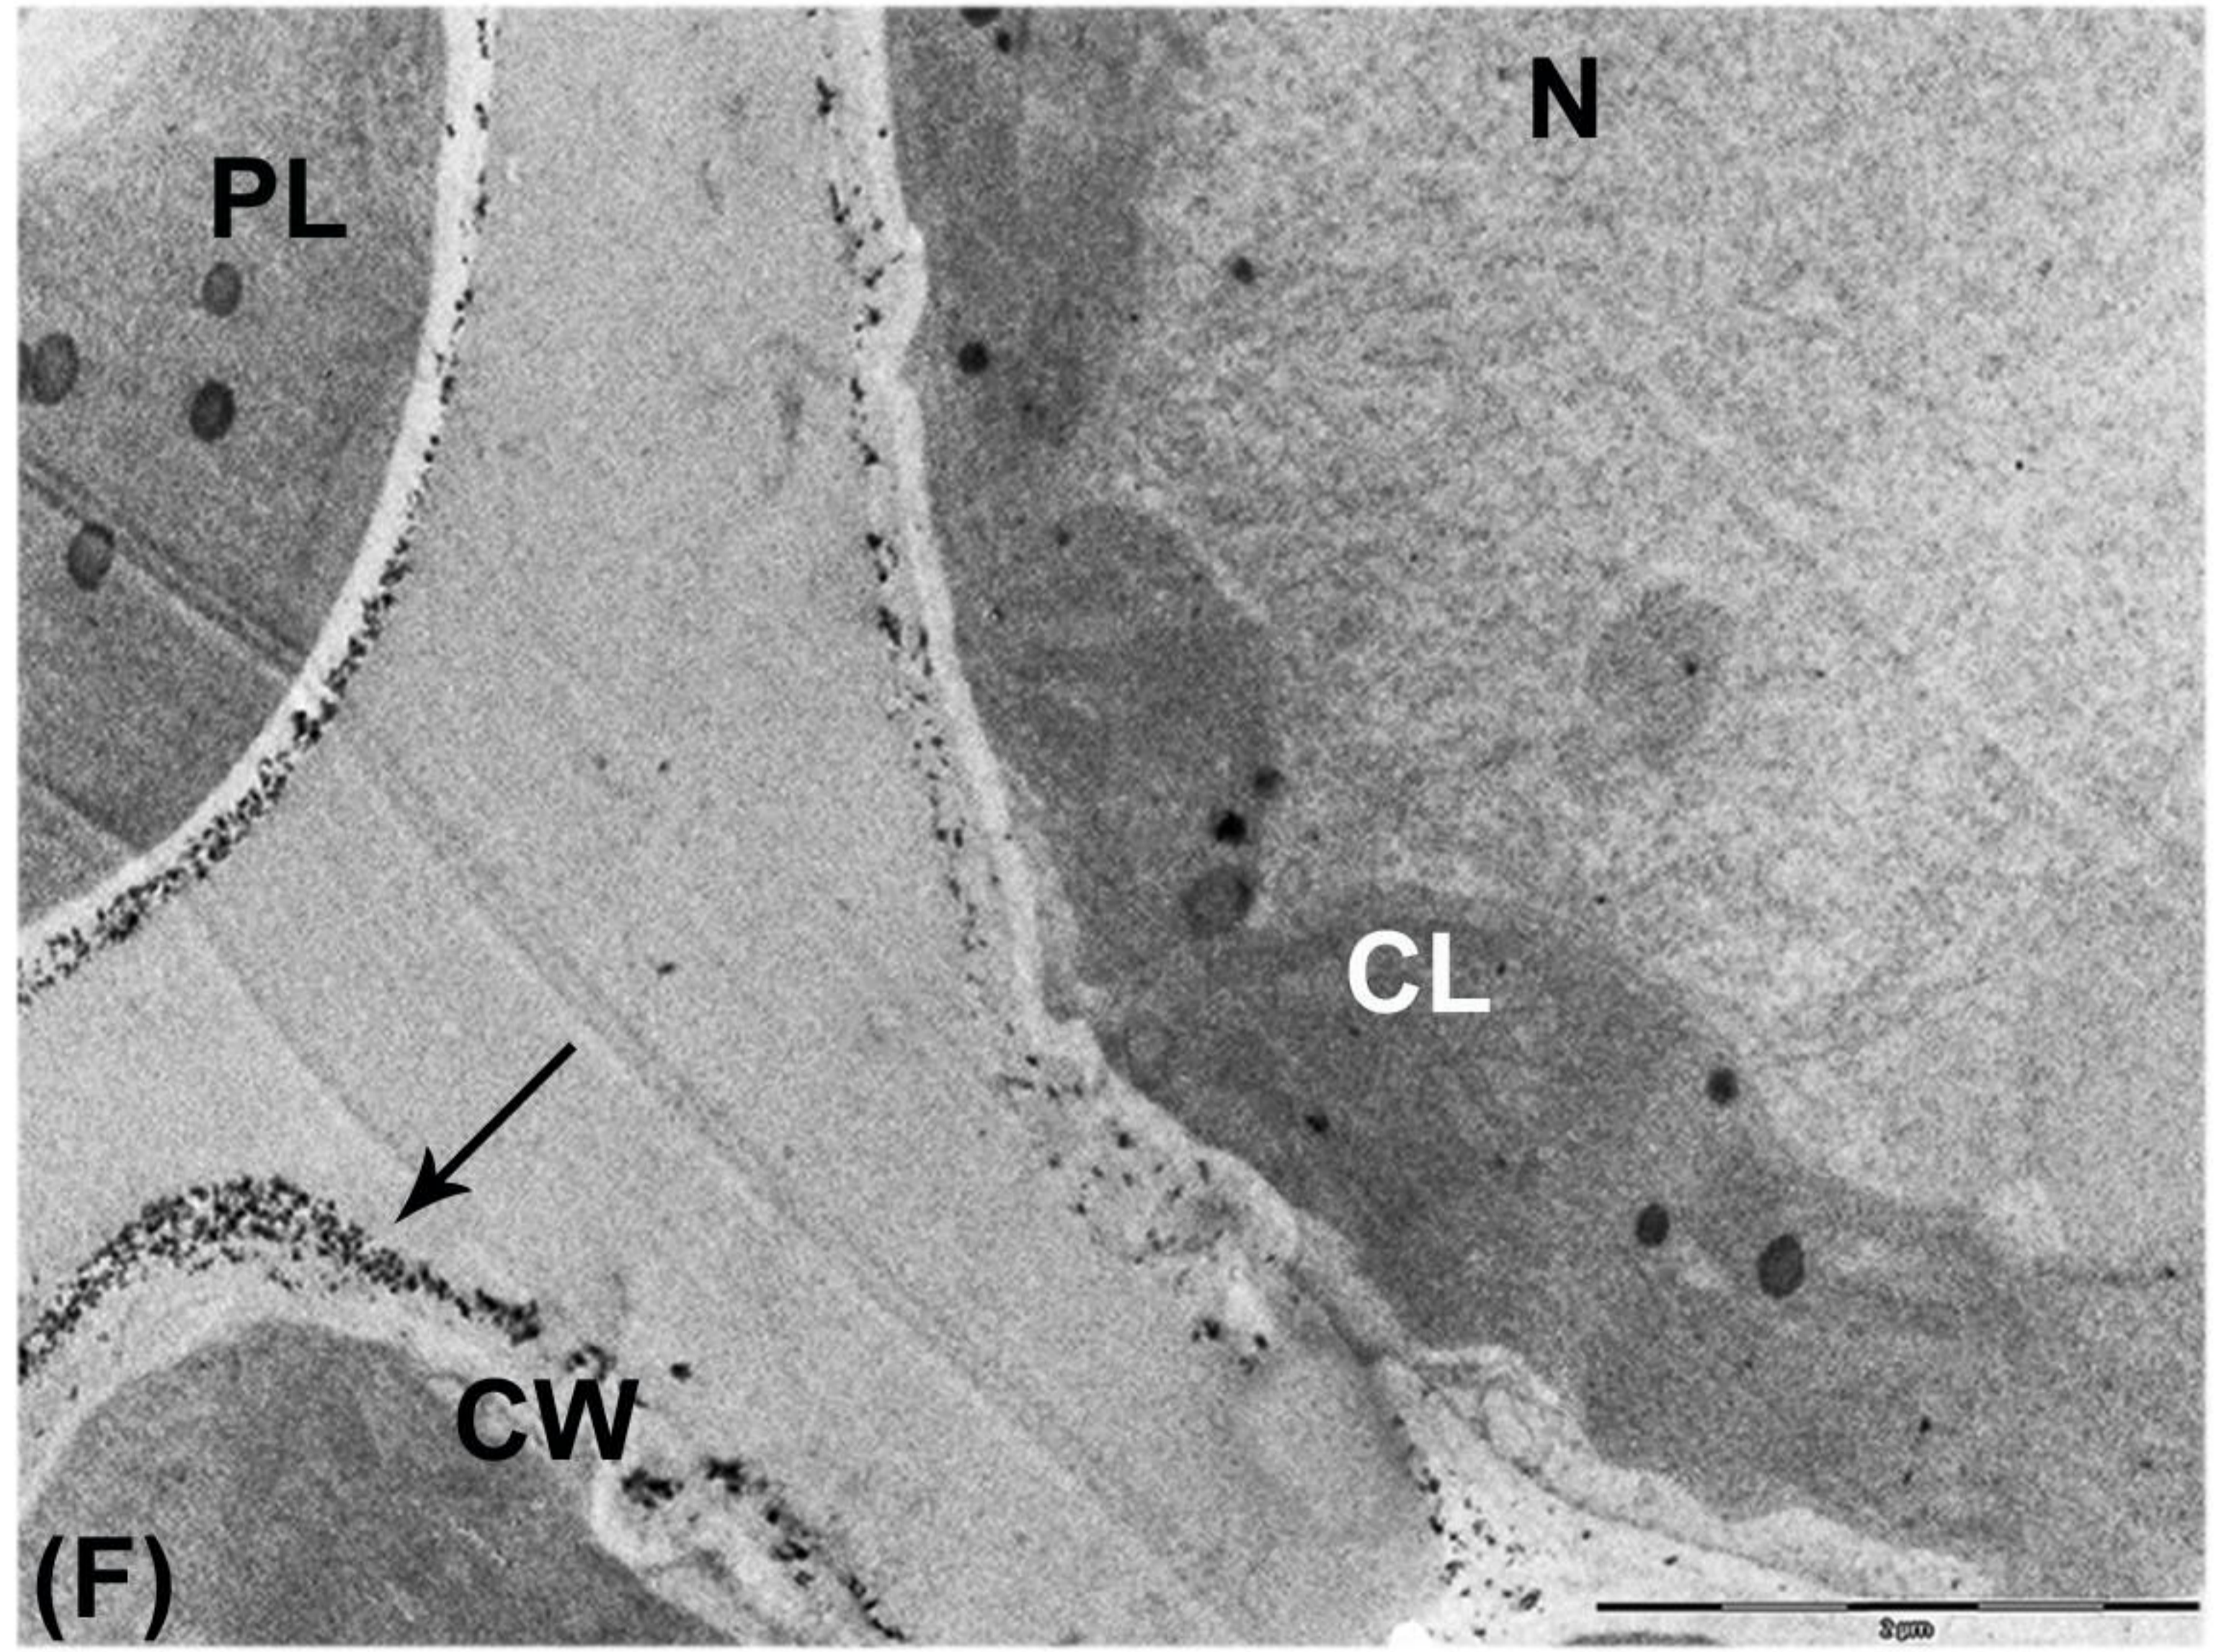

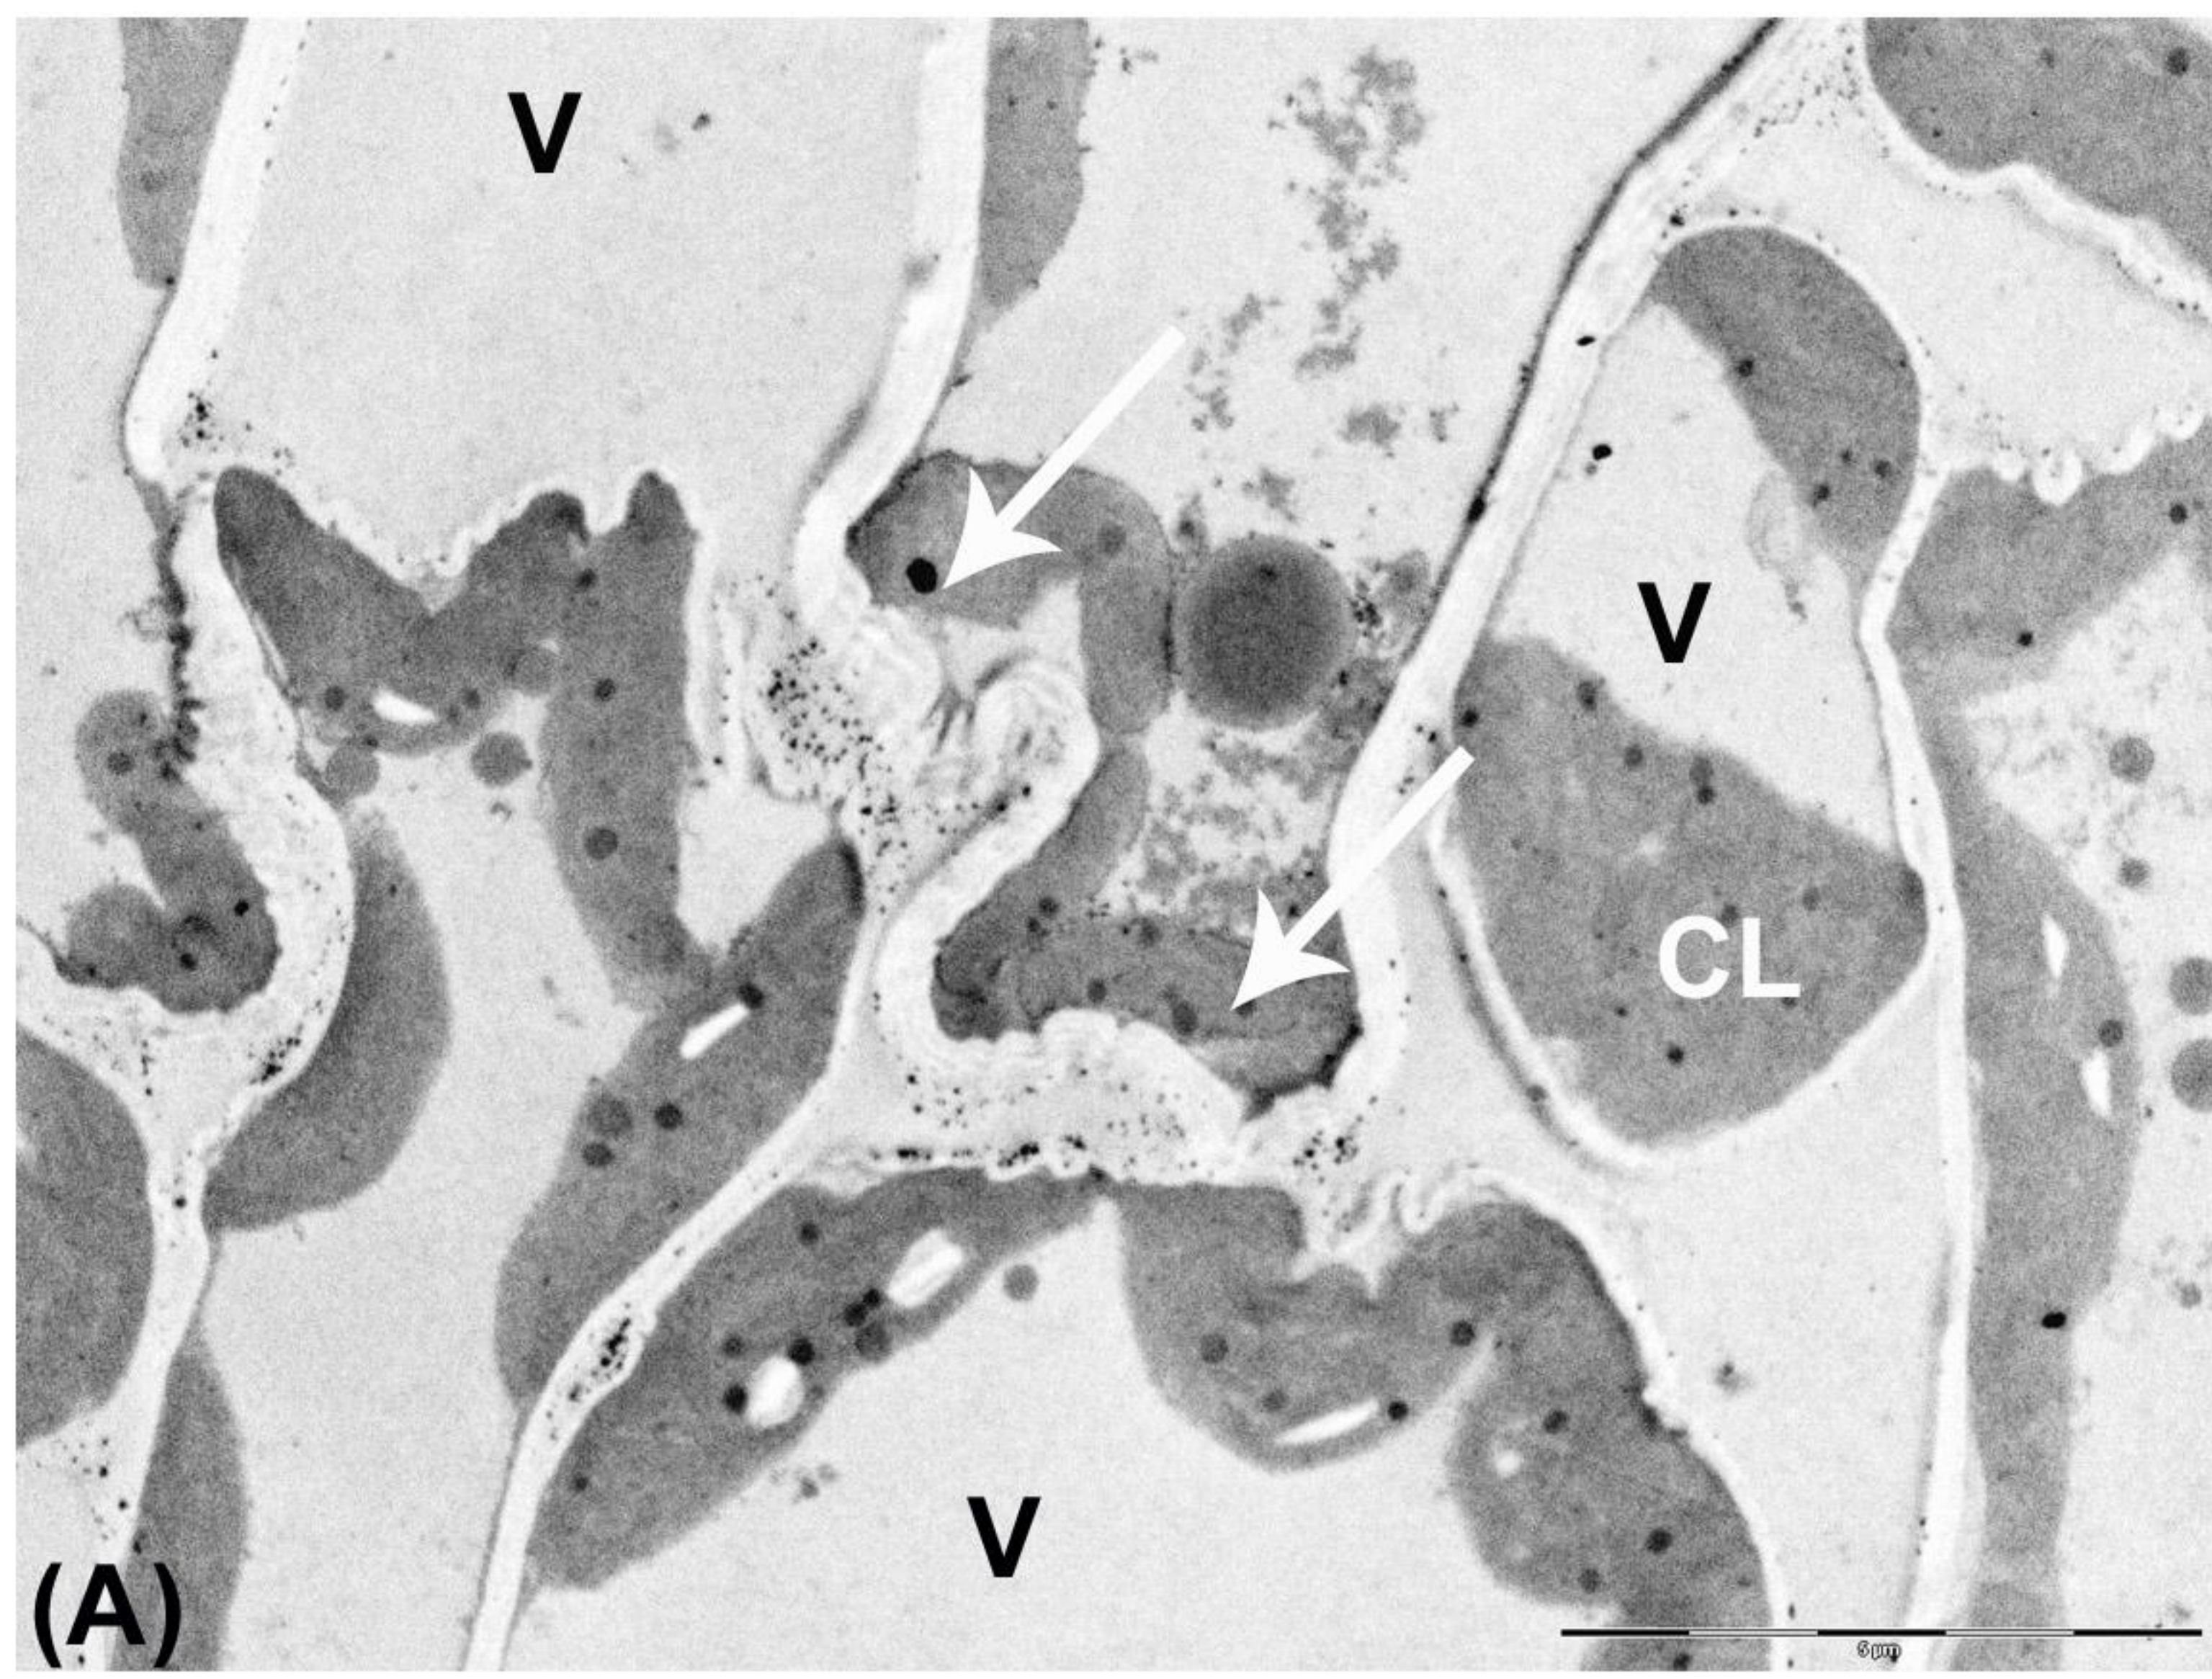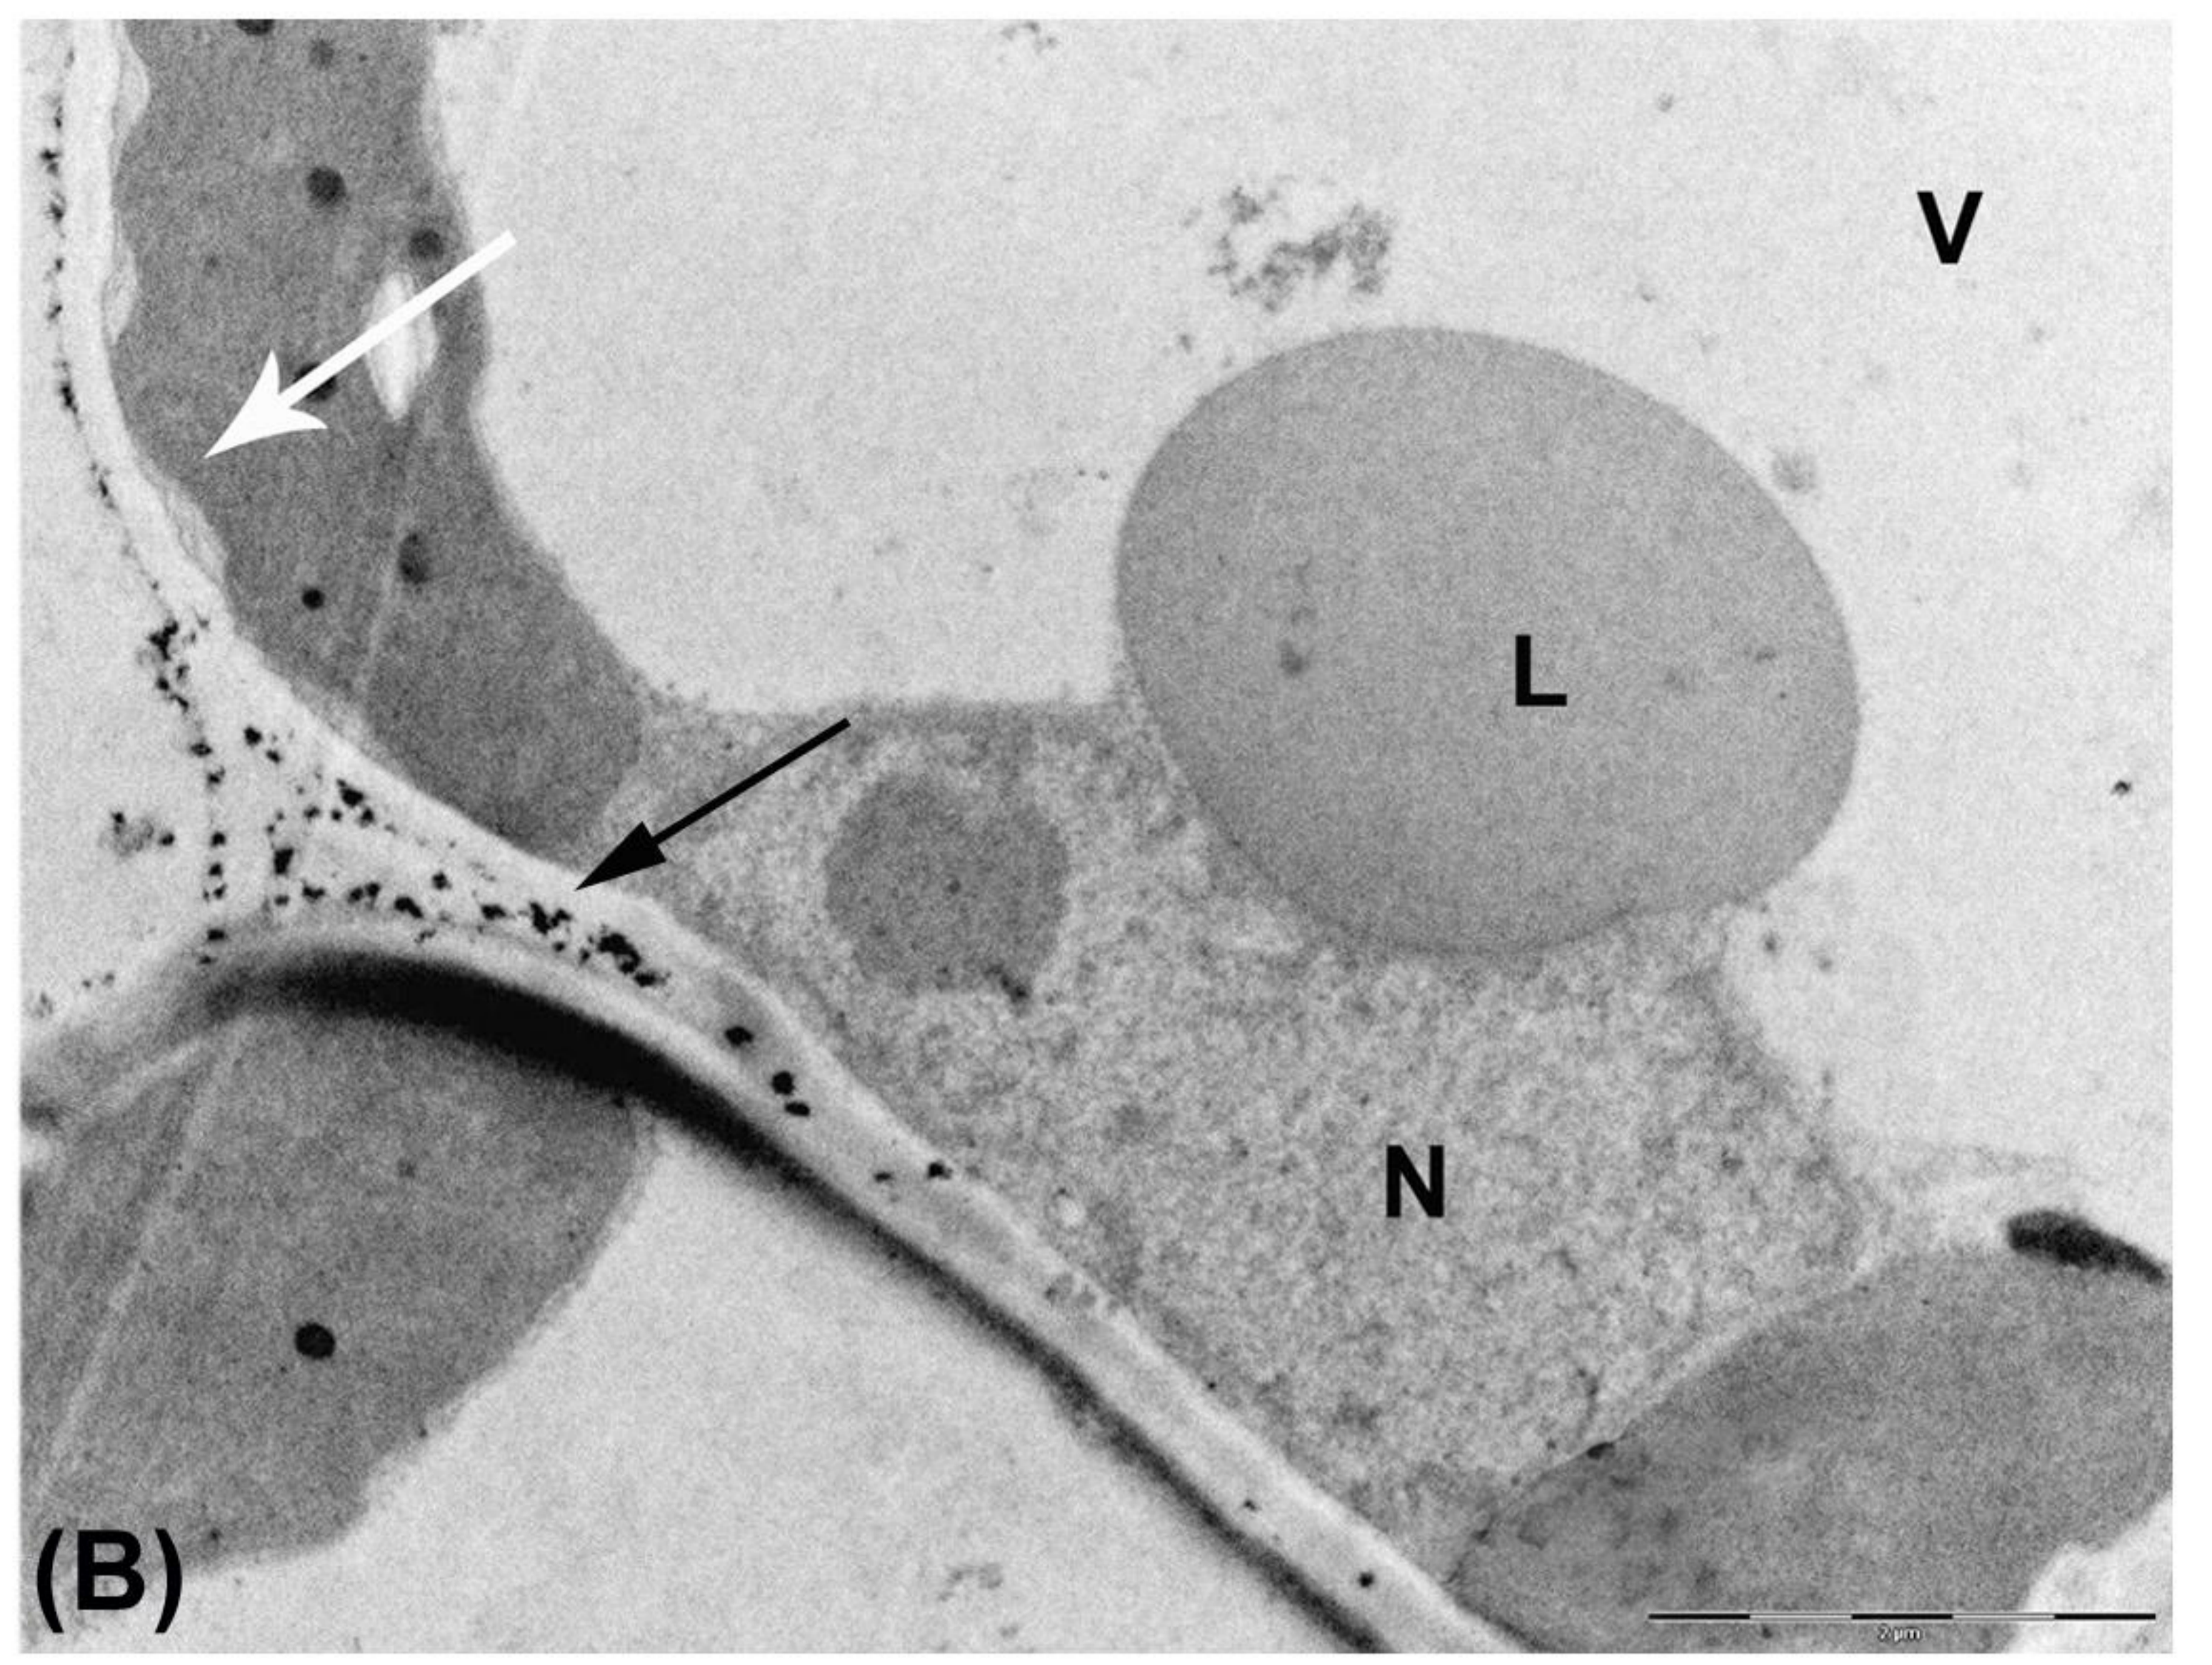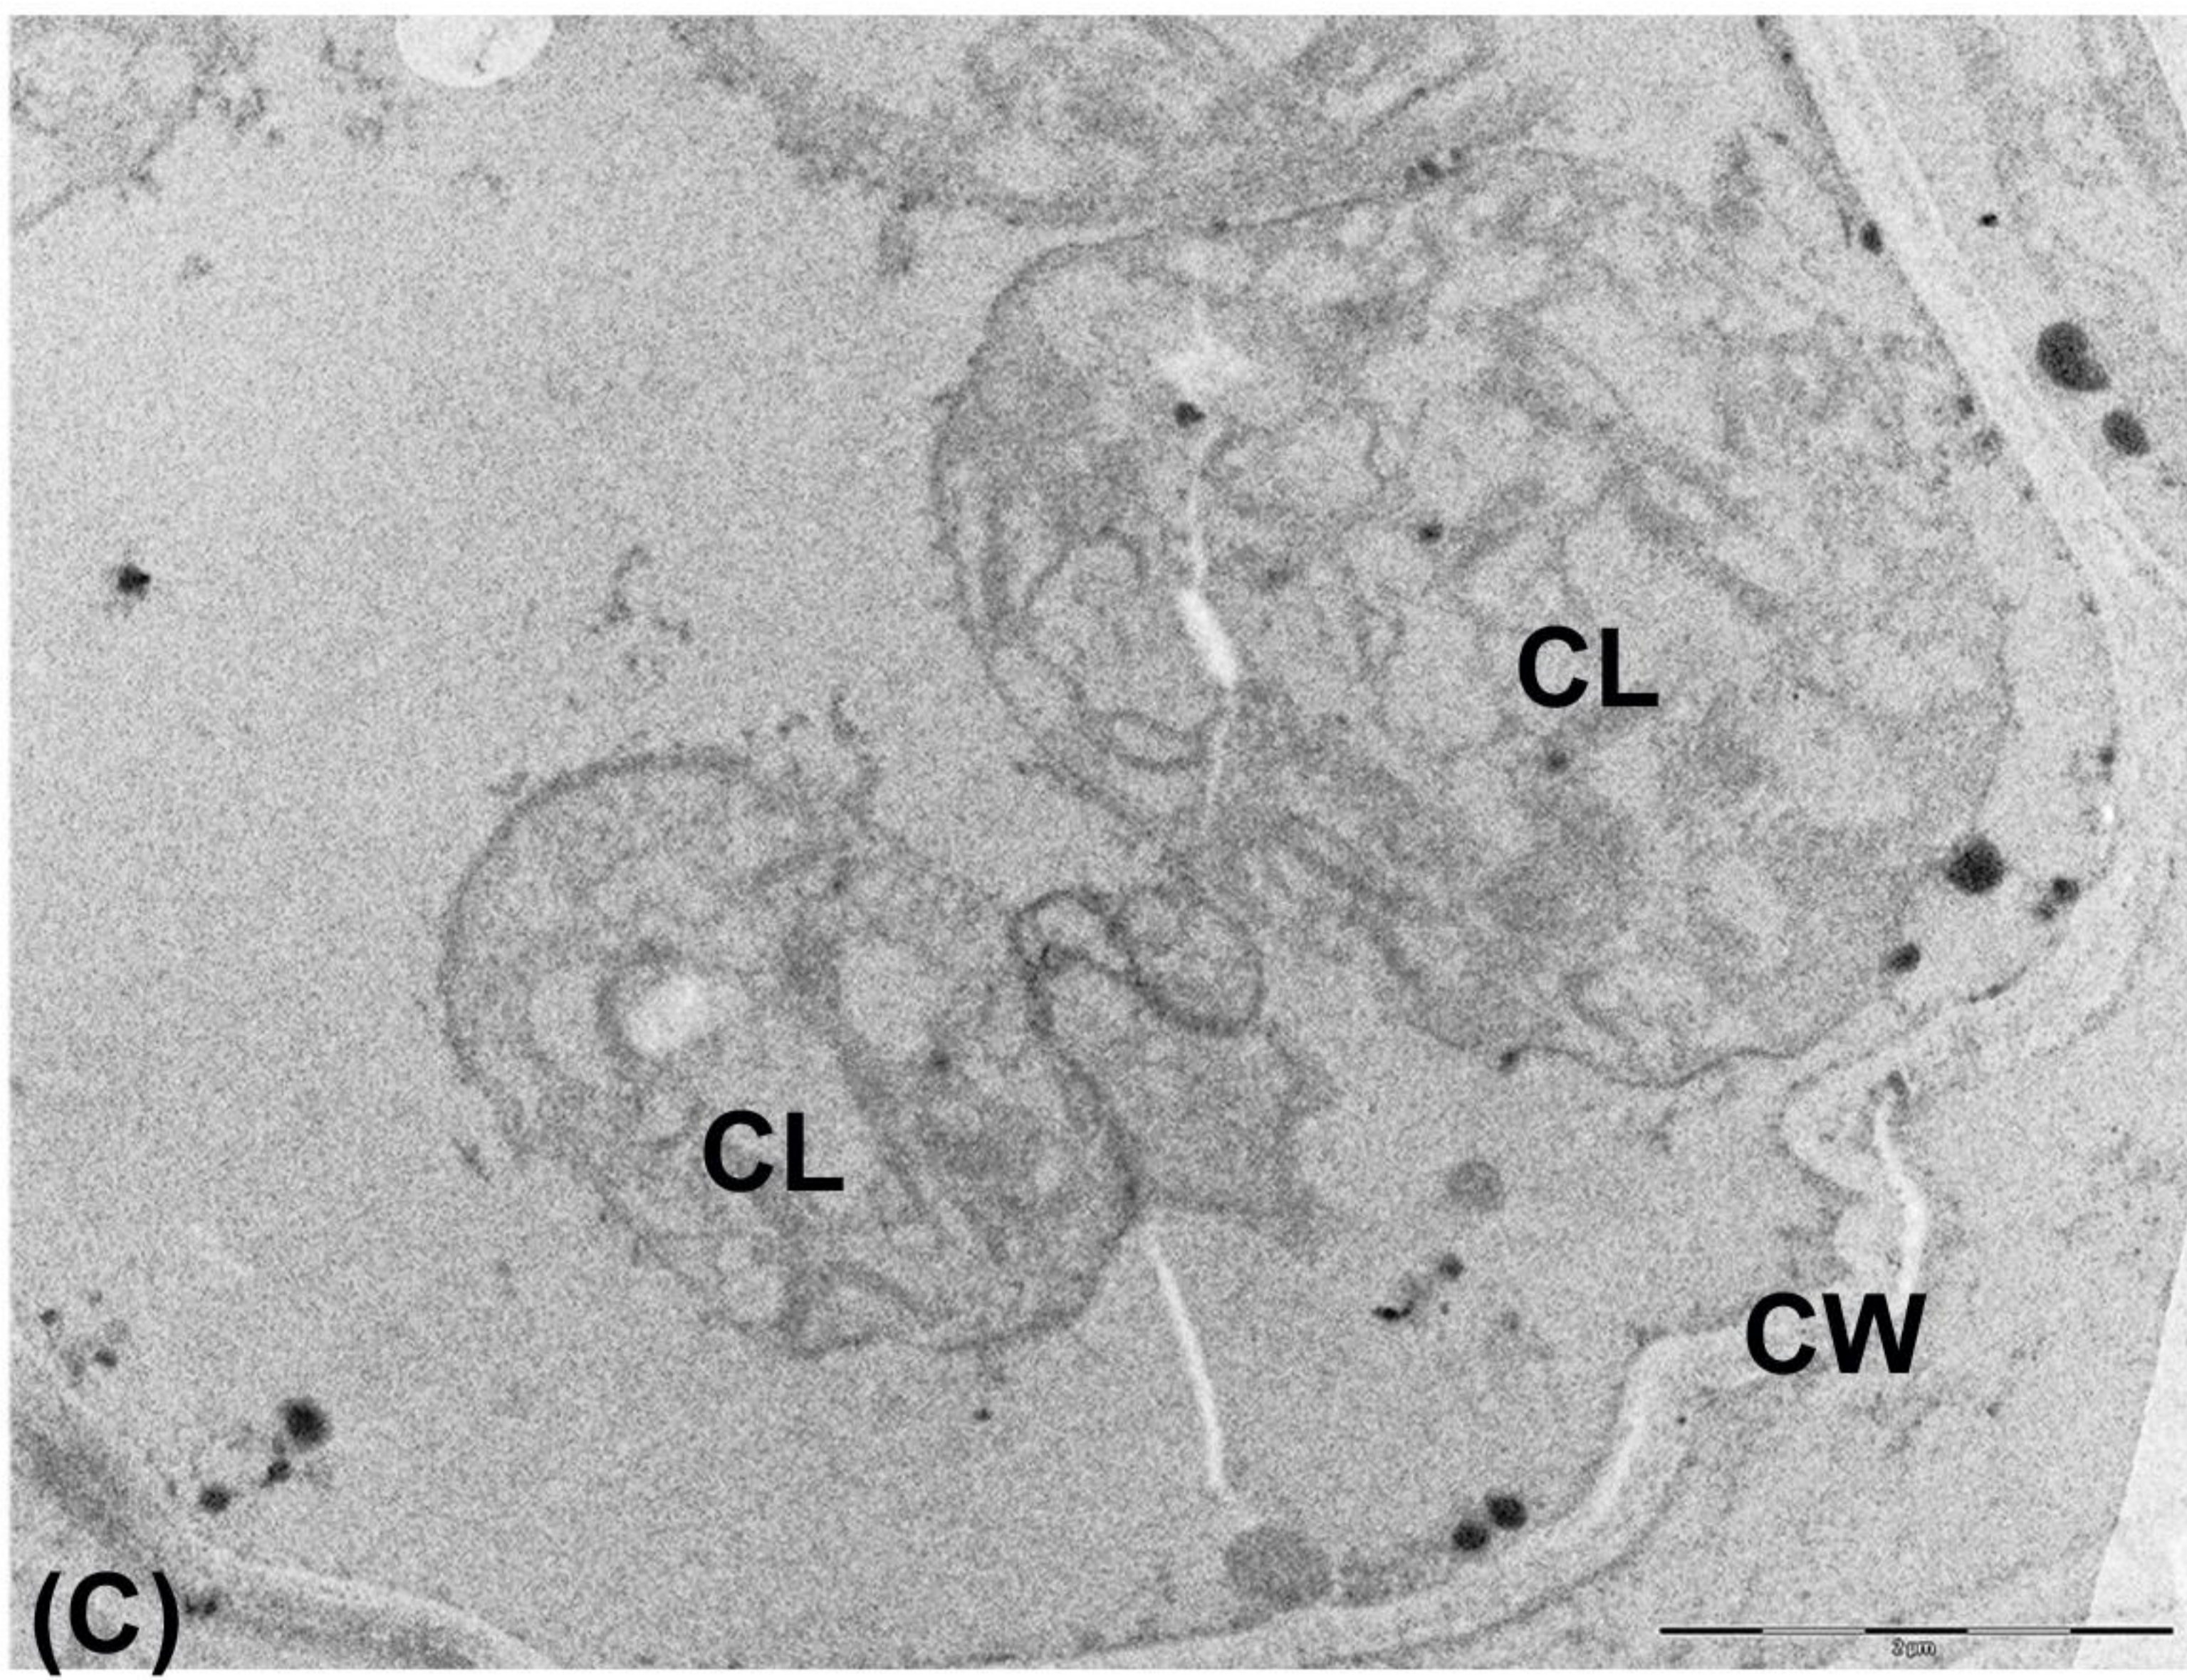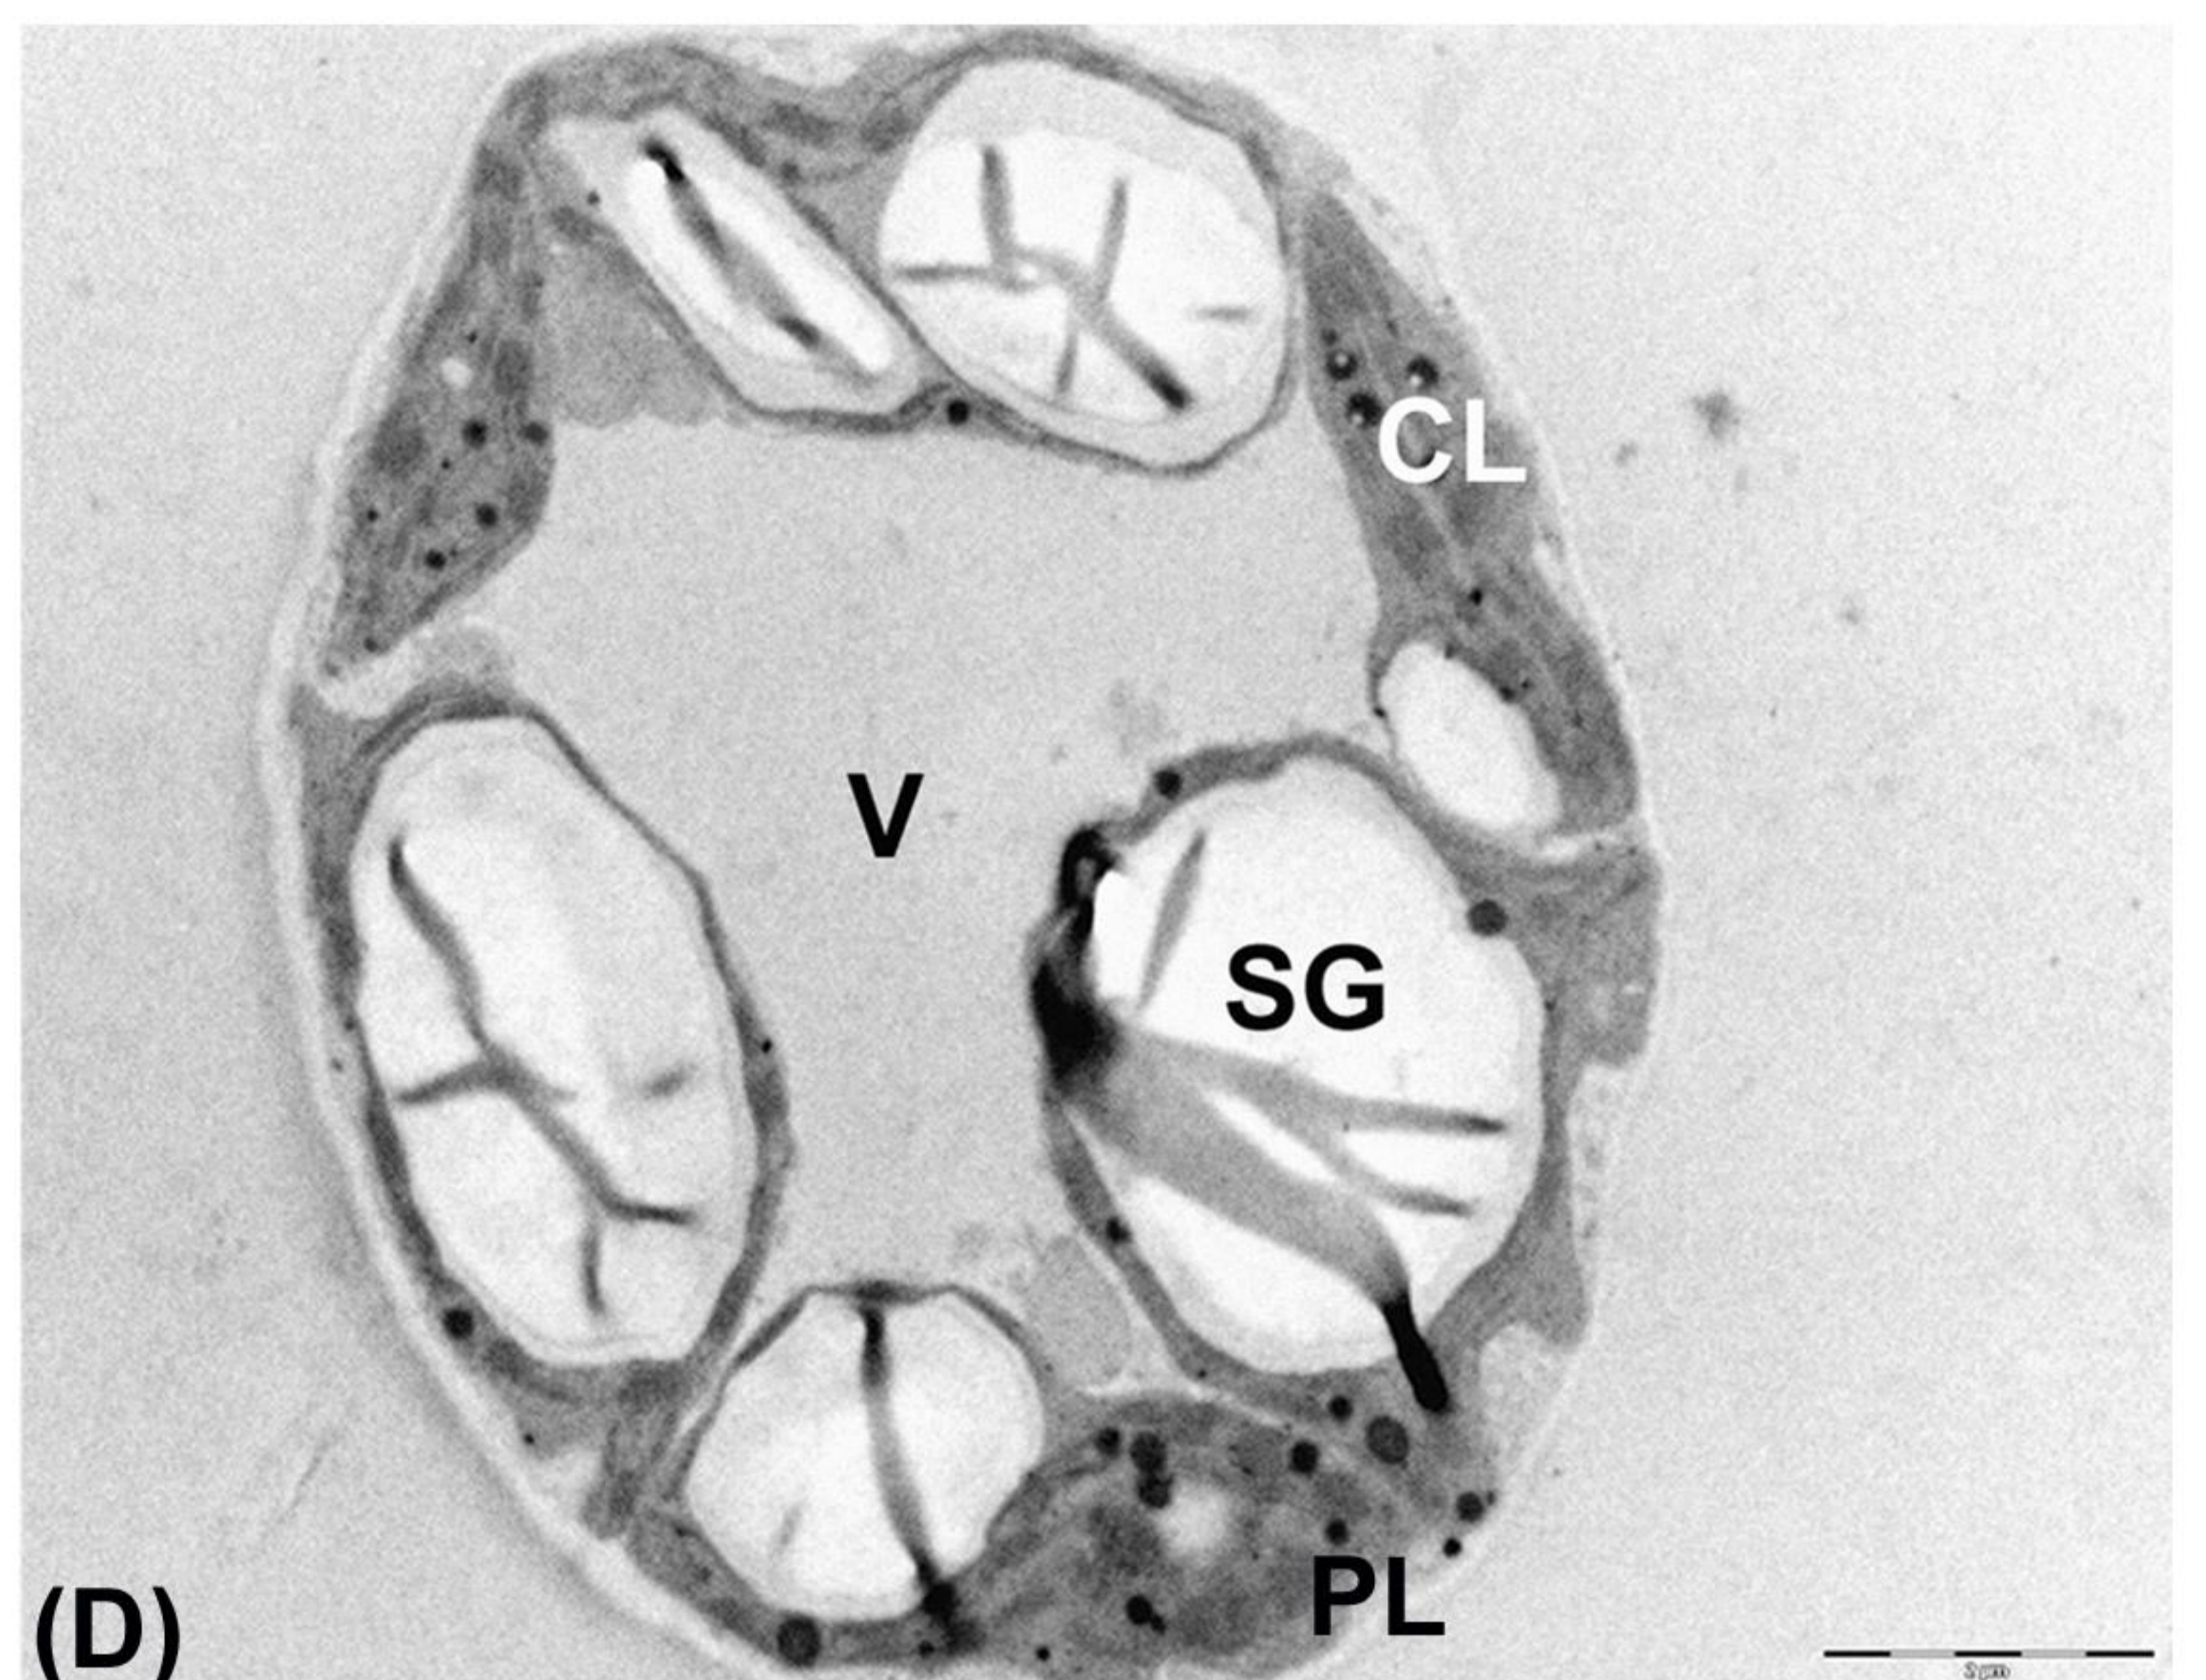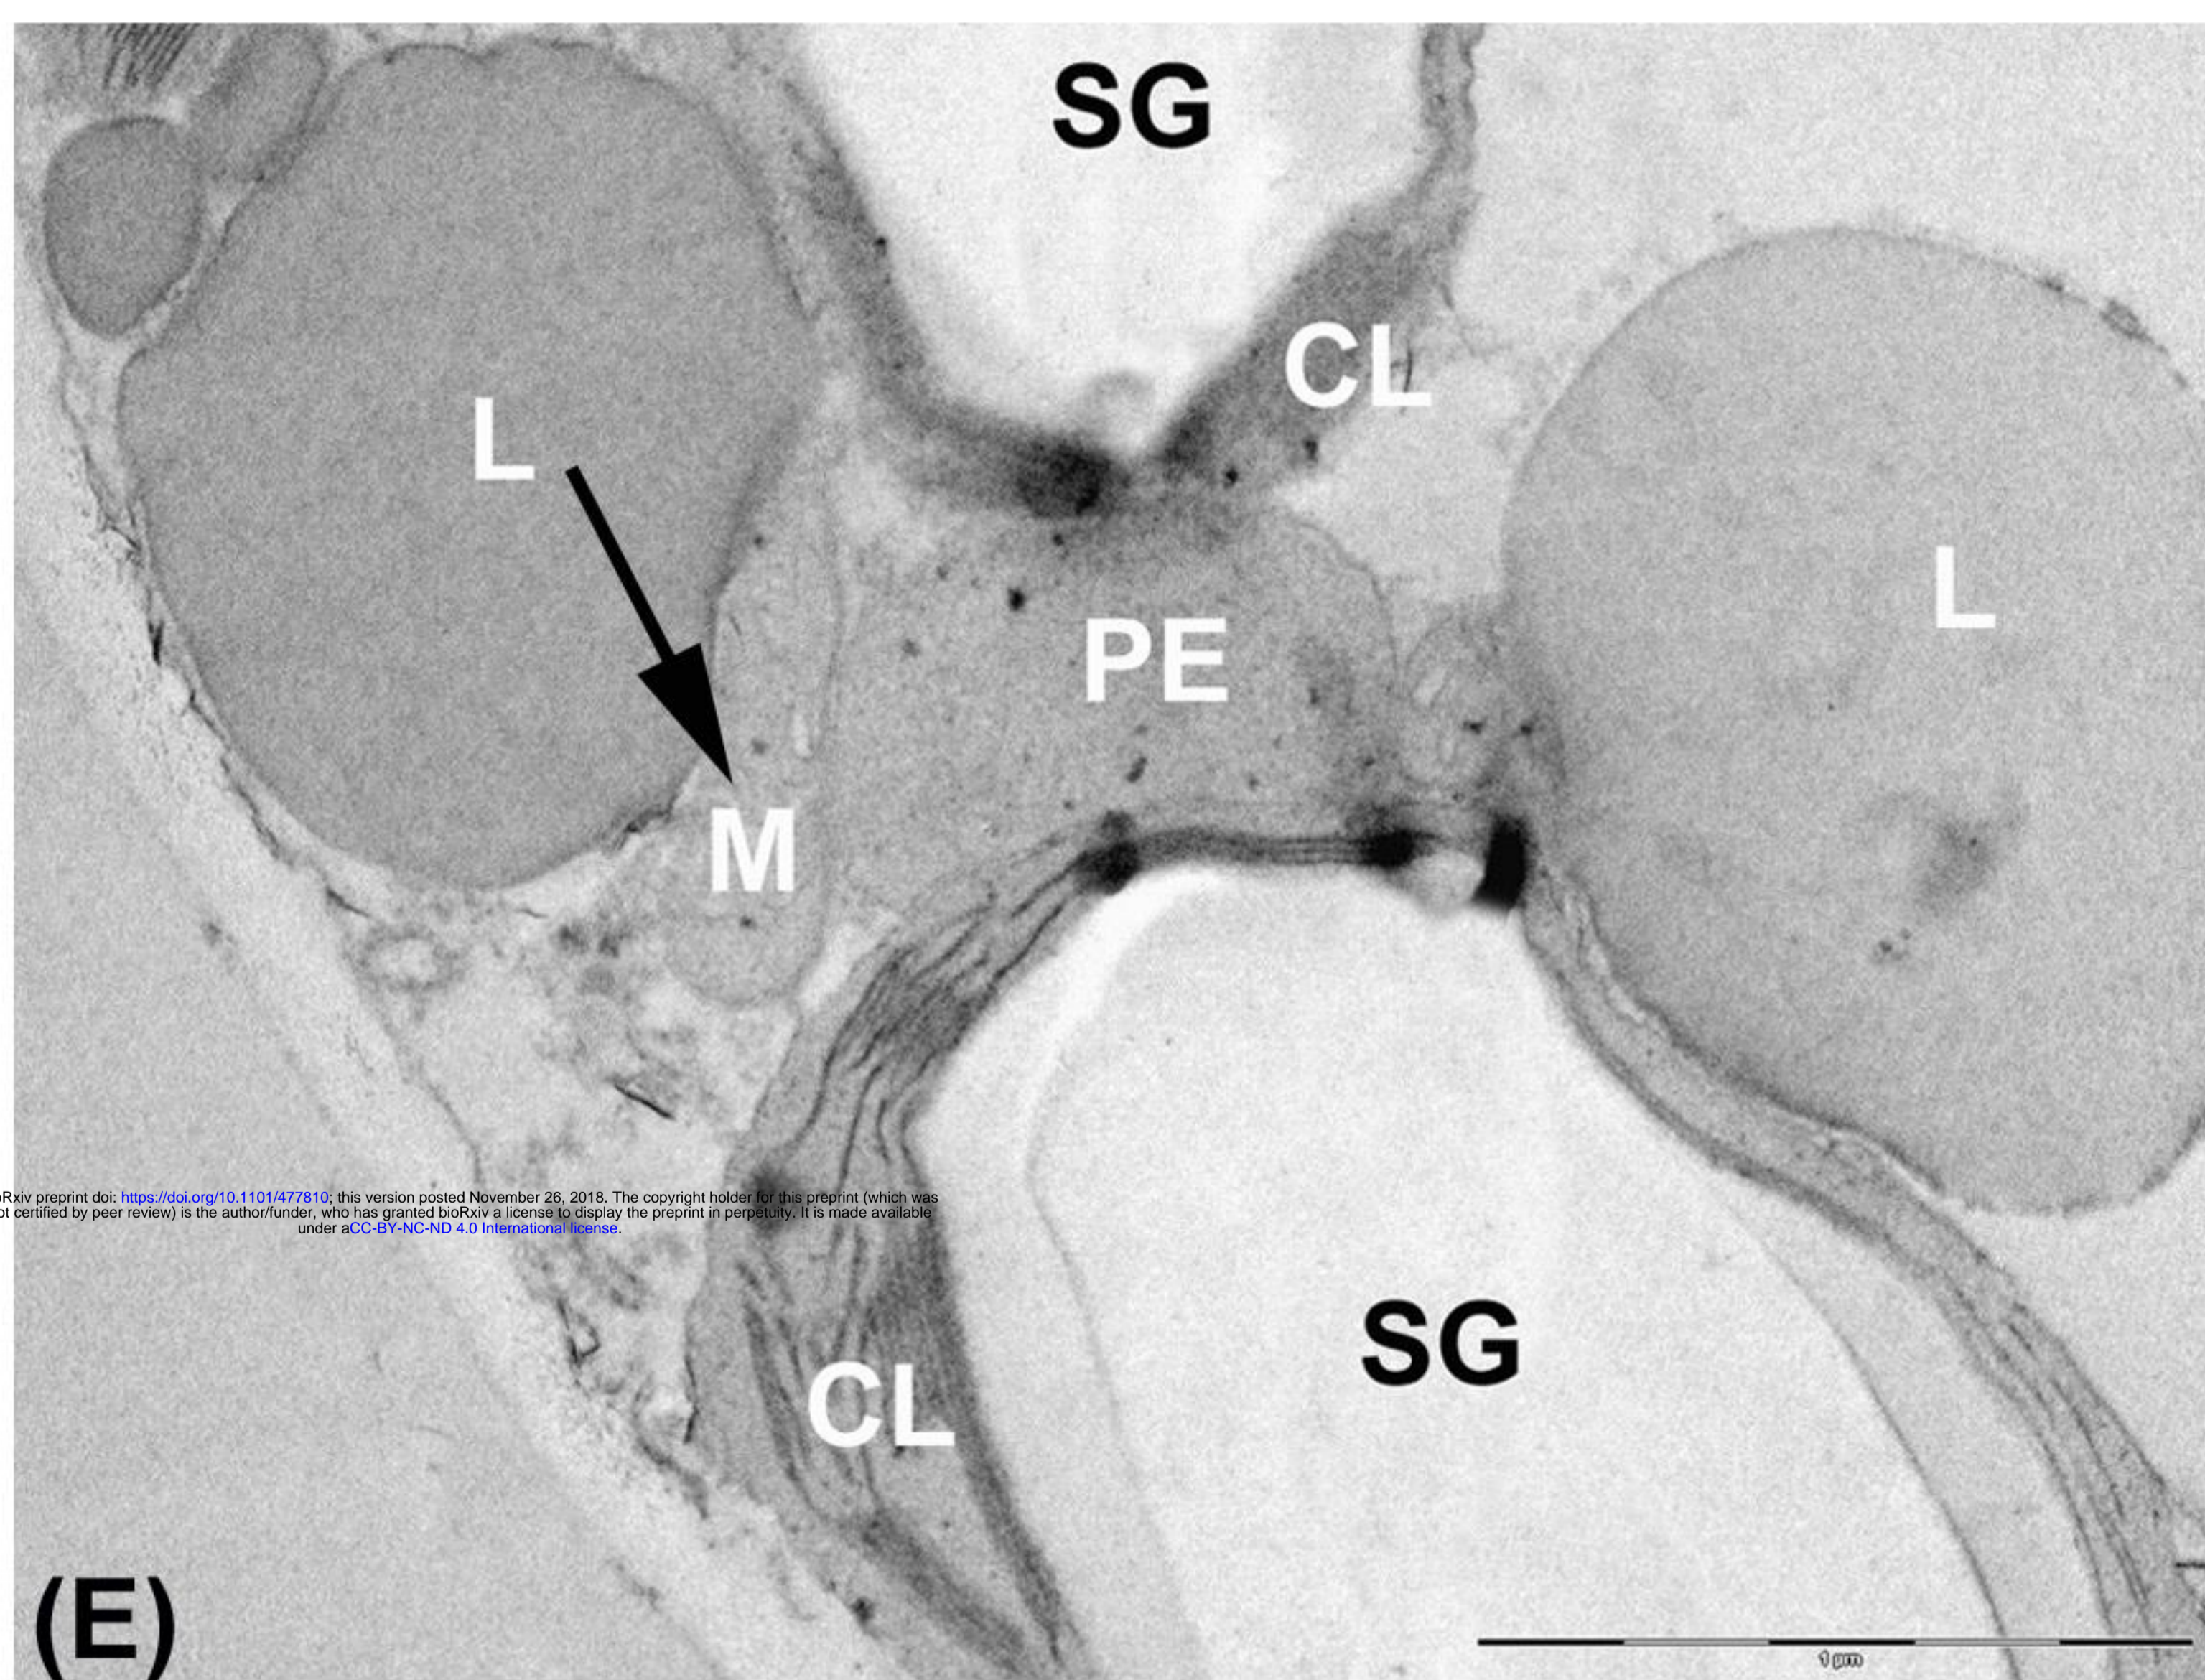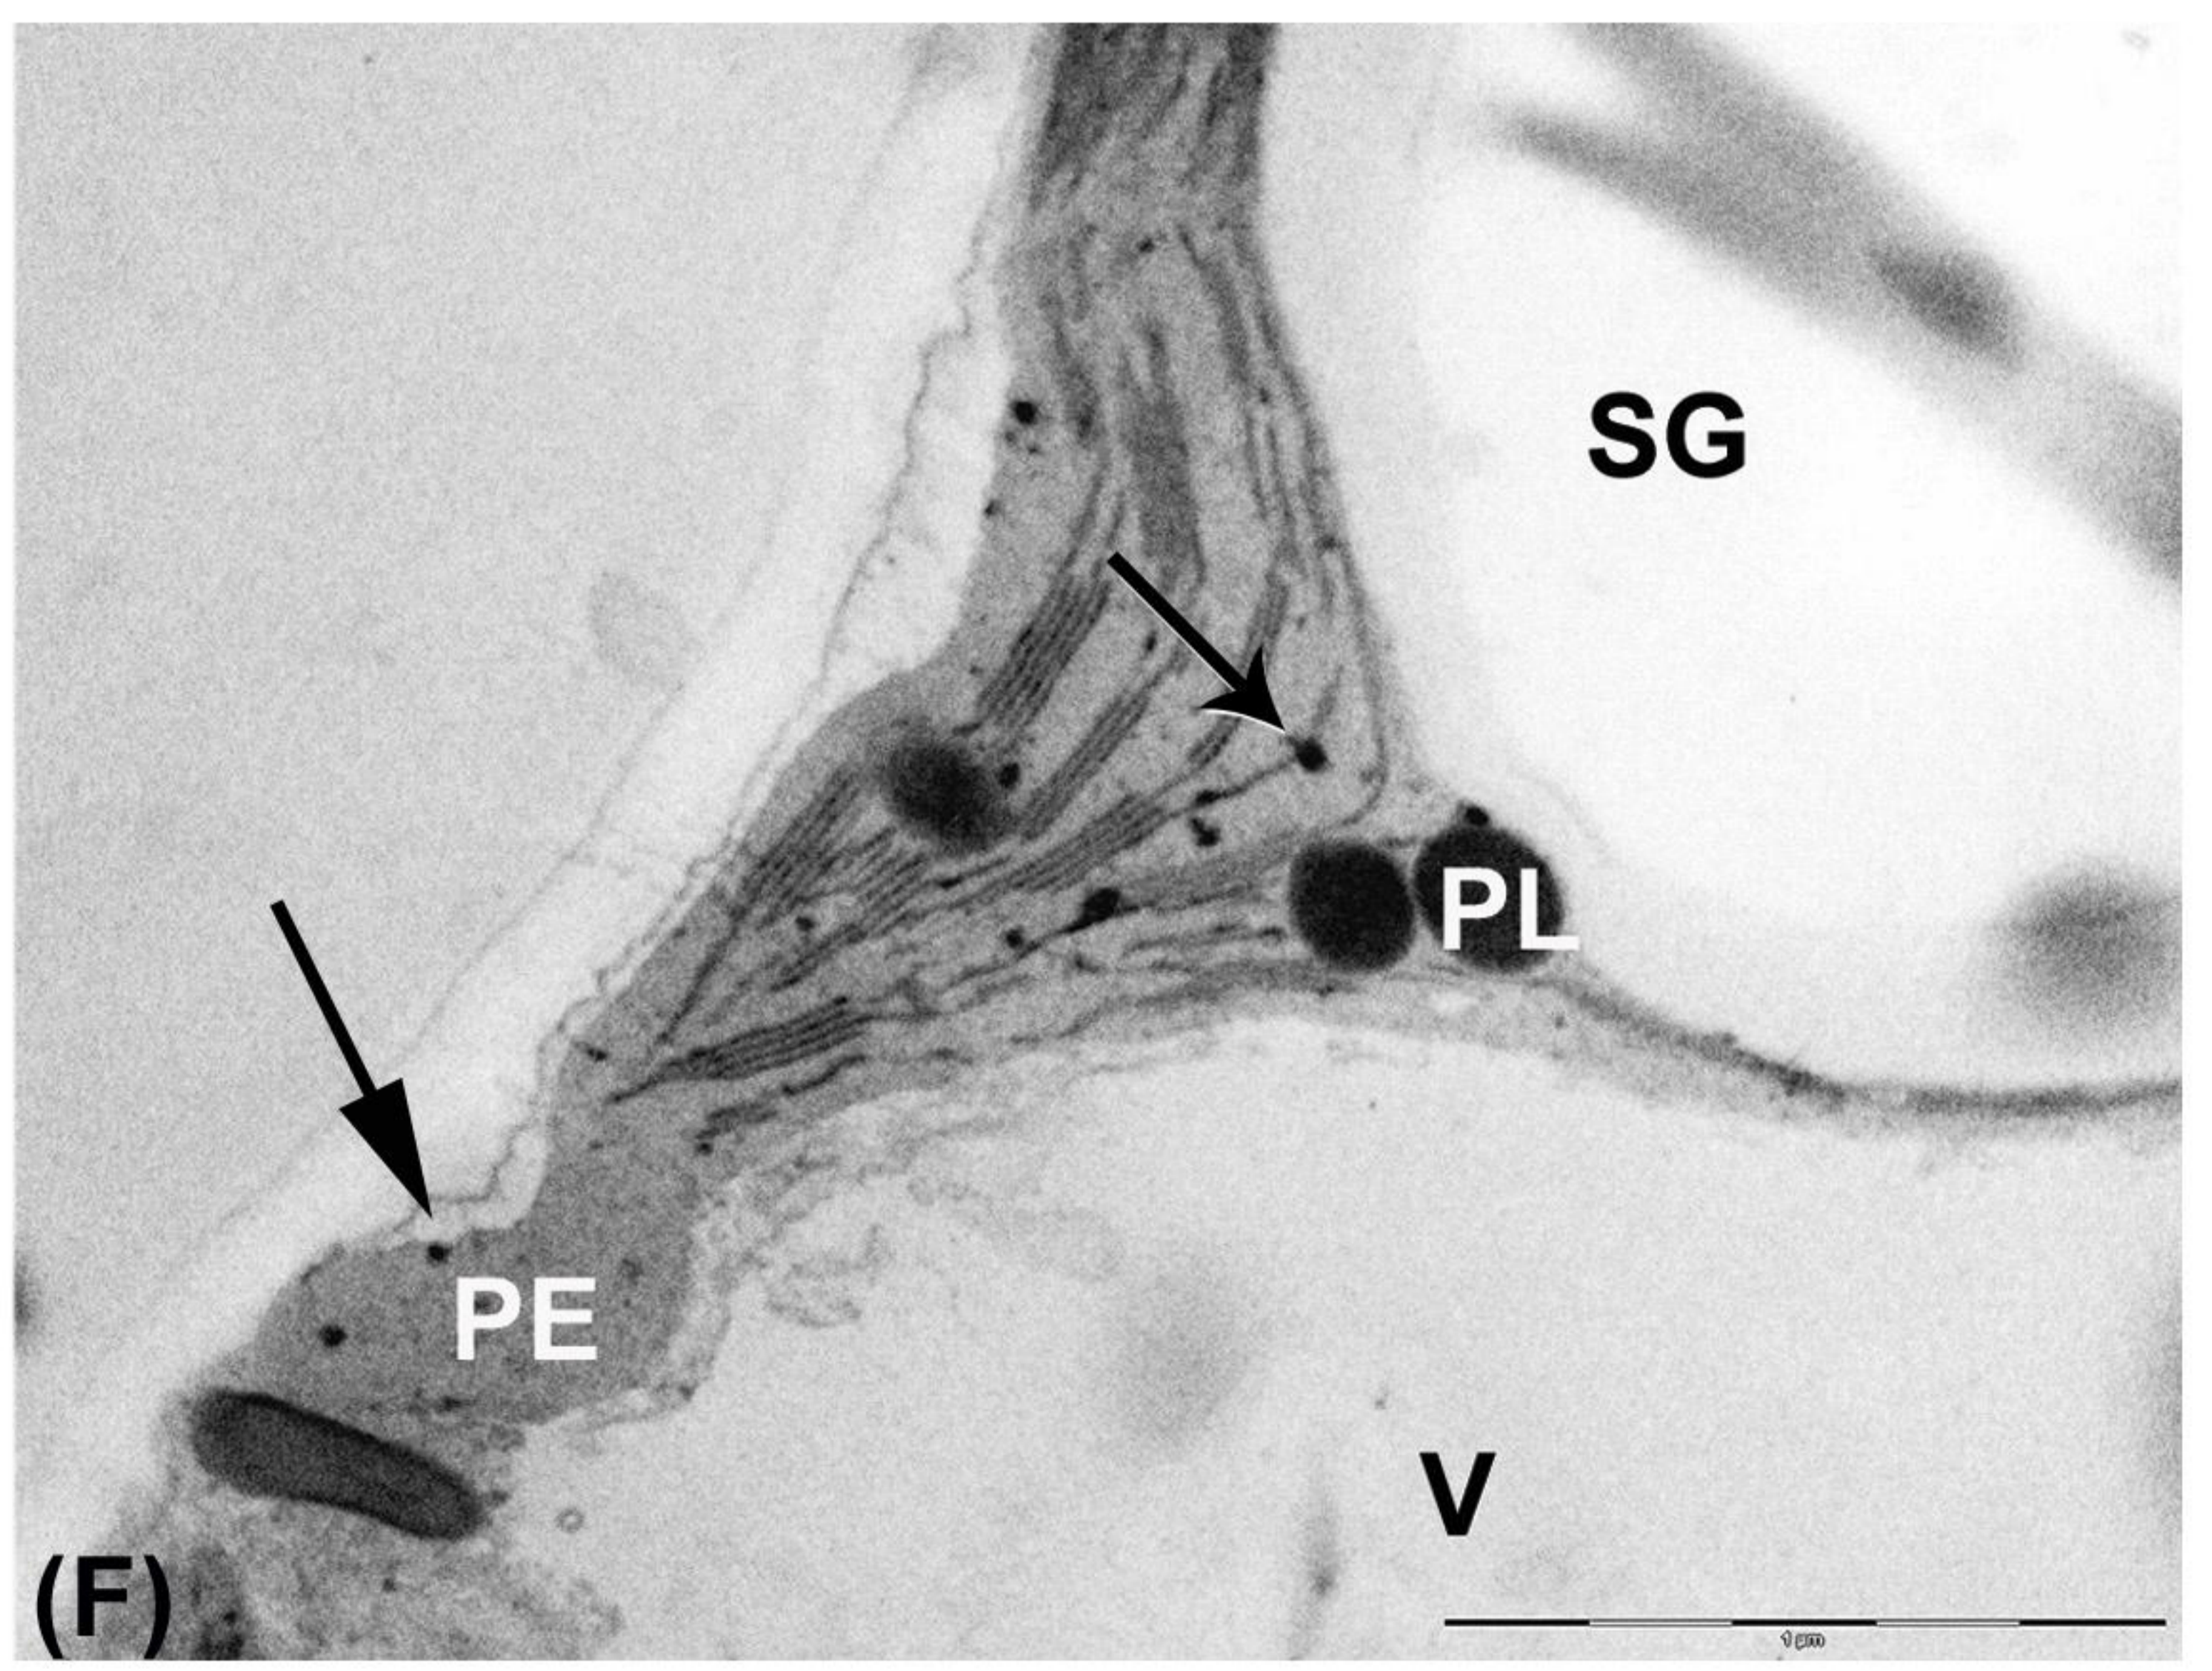

Source: https://www.biorxiv.org/content/10.1101/477810v1.full.pdf
